# Supplementary material for: Identification of AGR2 Gene-Specific Expression Patterns Associated with Epithelial-Mesenchymal Transition
Source: MDPI journal article supplement (doi:10.3390/ijms231810845), 2022-09-16
Supplement: s1 [file s1]

Table S1: Transcripts with their corresponding log fold change with adjusted P-value < 0.05

|              | scr vs TGFbeta |         | scr vs KO |         | scr vs KO+TGFbeta |         | TGFbeta vs KO+TGFbeta |                   |         | TGFbeta vs KO |      |         | KO+TGFbeta vs KO |      |         |
|--------------|----------------|---------|-----------|---------|-------------------|---------|-----------------------|-------------------|---------|---------------|------|---------|------------------|------|---------|
| Row.names    | X <sup>1</sup> | Log2FC  | X         | Log2FC  | X                 | Log2FC  | X                     | sign <sup>2</sup> | Log2FC  | X             | sign | Log2FC  | X                | sign | Log2FC  |
| RP11-395B7.7 | 46             | 0,9775  | 152       | -0,3194 | 303               | -0,7095 | 2                     | -1                | -1,6870 | 21            | -1   | -1,2969 | 802              | 1    | 0,3901  |
| PXDN         | 20051          | 0,0100  | 5         | -1,0451 | 22                | -1,6078 | 3                     | -1                | -1,6178 | 41            | -1   | -1,0552 | 412              | 1    | 0,5627  |
| HPGD         | 2932           | 0,1553  | 194       | -0,2914 | 49                | -1,2734 | 4                     | -1                | -1,4287 | 557           | -1   | -0,4467 | 77               | 1    | 0,9820  |
| HIST1H4L     | 3623           | 0,1348  | 14        | -0,6787 | 44                | -1,2916 | 5                     | -1                | -1,4264 | 117           | -1   | -0,8136 | 330              | 1    | 0,6128  |
| TP63         | 409            | 0,4766  | 113       | -0,3635 | 238               | -0,7787 | 8                     | -1                | -1,2553 | 104           | -1   | -0,8401 | 730              | 1    | 0,4152  |
| TNC          | 10907          | -0,0400 | 10        | 0,7451  | 84                | 1,0763  | 12                    | -1                | 1,1163  | 134           | -1   | 0,7851  | 1075             | 1    | -0,3311 |
| HNF4A        | 77             | 0,8211  | 2116      | -0,1028 | 1972              | -0,2607 | 13                    | -1                | -1,0818 | 74            | -1   | -0,9238 | 3089             | 1    | 0,1579  |
| ABCA1        | 1121           | 0,2811  | 246       | -0,2620 | 229               | -0,7865 | 14                    | -1                | -1,0676 | 362           | -1   | -0,5431 | 471              | 1    | 0,5245  |
| PAK3         | 11866          | -0,0348 | 74        | 0,4093  | 160               | 0,9068  | 23                    | -1                | 0,9416  | 566           | -1   | 0,4442  | 521              | 1    | -0,4974 |
| GREM1        | 134            | 0,7221  | 63        | -0,4418 | 3053              | -0,1927 | 26                    | -1                | -0,9148 | 27            | -1   | -1,1639 | 1648             | 1    | -0,2491 |
| F11R         | 1246           | 0,2640  | 47        | -0,4721 | 407               | -0,6260 | 29                    | -1                | -0,8900 | 165           | -1   | -0,7360 | 3199             | 1    | 0,1539  |
| UACA         | 74             | 0,8310  | 223       | -0,2727 | 14062             | -0,0282 | 34                    | -1                | -0,8592 | 30            | -1   | -1,1038 | 1694             | 1    | -0,2446 |
| DMBT1        | 25405          | -0,0051 | 54        | 0,4622  | 204               | 0,8274  | 38                    | -1                | 0,8325  | 510           | -1   | 0,4673  | 916              | 1    | -0,3652 |
| SEMA3E       | 360            | 0,5115  | 112       | -0,3645 | 1497              | -0,3111 | 39                    | -1                | -0,8226 | 89            | -1   | -0,8760 | 9178             | 1    | -0,0534 |
| F2RL1        | 1505           | 0,2371  | 22        | -0,5752 | 494               | -0,5748 | 41                    | -1                | -0,8119 | 119           | -1   | -0,8123 | 29102            | 1    | -0,0004 |
| TM4SF1       | 4695           | 0,1102  | 30        | -0,5182 | 337               | -0,6768 | 47                    | -1                | -0,7870 | 243           | -1   | -0,6284 | 3078             | 1    | 0,1586  |
| ITGB4        | 254            | 0,5830  | 229       | -0,2701 | 2997              | -0,1954 | 51                    | -1                | -0,7785 | 99            | -1   | -0,8532 | 7152             | 1    | -0,0747 |
| FST          | 183            | 0,6642  | 238       | -0,2655 | 5762              | -0,1125 | 53                    | -1                | -0,7767 | 68            | -1   | -0,9297 | 3231             | 1    | -0,1530 |
| SLC16A4      | 919            | 0,3161  | 296       | -0,2451 | 801               | -0,4546 | 55                    | -1                | -0,7707 | 335           | -1   | -0,5612 | 2095             | 1    | 0,2094  |
| BCL2A1       | 25402          | -0,0051 | 13302     | 0,0106  | 251               | 0,7655  | 56                    | -1                | 0,7706  | 16985         | -1   | 0,0157  | 198              | 1    | -0,7549 |
| STXBP6       | 8270           | 0,0615  | 145       | -0,3270 | 326               | -0,6878 | 61                    | -1                | -0,7493 | 738           | -1   | -0,3884 | 941              | 1    | 0,3609  |
| ACSF2        | 1677           | 0,2199  | 95        | -0,3791 | 636               | -0,5133 | 64                    | -1                | -0,7332 | 278           | -1   | -0,5990 | 3836             | 1    | 0,1342  |
| GLUL         | 2013           | 0,1947  | 108       | -0,3710 | 587               | -0,5349 | 65                    | -1                | -0,7296 | 325           | -1   | -0,5656 | 2954             | 1    | 0,1639  |
| ADD3         | 15814          | 0,0196  | 142       | -0,3279 | 308               | -0,7074 | 66                    | -1                | -0,7270 | 898           | -1   | -0,3475 | 850              | 1    | 0,3794  |
| COL4A4       | 404            | 0,4804  | 359       | -0,2268 | 2391              | -0,2289 | 72                    | -1                | -0,7094 | 190           | -1   | -0,7072 | 28333            | 1    | 0,0022  |
| PTPRD        | 19330          | -0,0114 | 65        | 0,4348  | 316               | 0,6979  | 73                    | -1                | 0,7093  | 559           | -1   | 0,4461  | 1532             | 1    | -0,2631 |
| CELSR3       | 14095          | 0,0250  | 50        | -0,4661 | 344               | -0,6716 | 76                    | -1                | -0,6966 | 456           | -1   | -0,4911 | 2153             | 1    | 0,2055  |
| SCD          | 762            | 0,3502  | 31        | -0,5104 | 1292              | -0,3412 | 77                    | -1                | -0,6914 | 95            | -1   | -0,8606 | 2841             | 1    | -0,1692 |
| GBP1         | 6333           | -0,0842 | 168       | 0,3084  | 434               | 0,6062  | 78                    | -1                | 0,6904  | 723           | -1   | 0,3925  | 1273             | 1    | -0,2979 |

|               |       |         |      |         |      |         |     |    |         |         |    |         |        |   |         |
|---------------|-------|---------|------|---------|------|---------|-----|----|---------|---------|----|---------|--------|---|---------|
| CAPG          | 4027  | 0,1245  | 283  | -0,2484 | 565  | -0,5444 | 86  | -1 | -0,6689 | 786     | -1 | -0,3729 | 1282   | 1 | 0,2960  |
| ARAP2         | 7516  | 0,0697  | 264  | -0,2559 | 444  | -0,5985 | 87  | -1 | -0,6682 | 1014    | -1 | -0,3256 | 1024   | 1 | 0,3426  |
| PLEKHA6       | 6806  | 0,0777  | 100  | -0,3758 | 472  | -0,5889 | 88  | -1 | -0,6666 | 541     | -1 | -0,4536 | 2052   | 1 | 0,2130  |
| HOXB9         | 19135 | -0,0123 | 488  | 0,2027  | 368  | 0,6513  | 91  | -1 | 0,6635  | 2130    | -1 | 0,2149  | 637    | 1 | -0,4486 |
| SORT1         | 5214  | 0,1012  | 131  | -0,3385 | 522  | -0,5585 | 92  | -1 | -0,6597 | 581     | -1 | -0,4397 | 1976   | 1 | 0,2200  |
| ATP9A         | 6788  | 0,0779  | 105  | -0,3718 | 514  | -0,5632 | 103 | -1 | -0,6411 | 549     | -1 | -0,4497 | 2387   | 1 | 0,1914  |
| FLRT3         | 1173  | 0,2736  | 252  | -0,2601 | 1234 | -0,3509 | 114 | -1 | -0,6245 | 376     | -1 | -0,5337 | 5998   | 1 | 0,0907  |
| CCL2          | 1104  | -0,2837 | 302  | 0,2443  | 1325 | 0,3350  | 116 | -1 | 0,6187  | 384     | -1 | 0,5280  | 5999   | 1 | -0,0907 |
| CTD-2377D24.8 | 18519 | -0,0131 | 9803 | 0,0210  | 441  | 0,5995  | 120 | -1 | 0,6126  | 11907,5 | -1 | 0,0341  | 381    | 1 | -0,5785 |
| MAP7          | 15174 | 0,0208  | 35   | -0,4931 | 474  | -0,5871 | 125 | -1 | -0,6080 | 407     | -1 | -0,5139 | 5797   | 1 | 0,0940  |
| THY1          | 8210  | 0,0622  | 226  | -0,2723 | 574  | -0,5414 | 126 | -1 | -0,6036 | 966     | -1 | -0,3345 | 1473   | 1 | 0,2691  |
| RPL23A        | 6427  | 0,0827  | 796  | -0,1645 | 734  | -0,4795 | 151 | -1 | -0,5622 | 1676    | -1 | -0,2472 | 1156   | 1 | 0,3150  |
| DCLK1         | 2384  | -0,1767 | 26   | 0,5528  | 1075 | 0,3829  | 153 | -1 | 0,5596  | 170     | -1 | 0,7295  | 2827   | 1 | 0,1699  |
| IL8           | 9326  | -0,0516 | 45   | 0,4745  | 678  | 0,4958  | 162 | -1 | 0,5474  | 388     | -1 | 0,5262  | 14984  | 1 | -0,0213 |
| RGS3          | 12107 | -0,0337 | 3889 | 0,0679  | 640  | 0,5117  | 164 | -1 | 0,5454  | 5654    | -1 | 0,1015  | 652    | 1 | -0,4438 |
| GPRC5B        | 2068  | 0,1921  | 5074 | -0,0534 | 1465 | -0,3149 | 200 | -1 | -0,5070 | 1702    | -1 | -0,2455 | 1543   | 1 | 0,2615  |
| APOBEC3C      | 6322  | 0,0843  | 1317 | -0,1316 | 987  | -0,4083 | 212 | -1 | -0,4927 | 2107    | -1 | -0,2159 | 1406   | 1 | 0,2767  |
| ITGB5         | 8761  | 0,0566  | 99   | -0,3761 | 909  | -0,4240 | 230 | -1 | -0,4806 | 601     | -1 | -0,4327 | 9861   | 1 | 0,0479  |
| TUSC3         | 14880 | -0,0221 | 70   | 0,4138  | 793  | 0,4565  | 235 | -1 | 0,4786  | 593     | -1 | 0,4359  | 10568  | 1 | -0,0427 |
| CTD-2354A18.1 | 817   | -0,3406 | 197  | 0,2855  | 4868 | 0,1325  | 241 | -1 | 0,4731  | 247     | -1 | 0,6262  | 3230   | 1 | 0,1531  |
| SLC8A1        | 6198  | -0,0862 | 1280 | 0,1336  | 1101 | 0,3777  | 251 | -1 | 0,4640  | 2045    | -1 | 0,2198  | 1699   | 1 | -0,2442 |
| NDRG4         | 2304  | 0,1802  | 509  | -0,1989 | 1832 | -0,2738 | 266 | -1 | -0,4540 | 763     | -1 | -0,3791 | 7125   | 1 | 0,0749  |
| TSPAN15       | 1228  | 0,2663  | 642  | -0,1808 | 3441 | -0,1774 | 281 | -1 | -0,4437 | 555     | -1 | -0,4471 | 24928  | 1 | -0,0034 |
| ANK3          | 3358  | 0,1425  | 1884 | -0,1096 | 1666 | -0,2918 | 297 | -1 | -0,4343 | 1628    | -1 | -0,2521 | 2560,5 | 1 | 0,1822  |
| FLCN          | 4596  | 0,1120  | 370  | -0,2237 | 1427 | -0,3213 | 300 | -1 | -0,4332 | 958     | -1 | -0,3357 | 5567   | 1 | 0,0975  |
| BNIP3L        | 900   | 0,3200  | 326  | -0,2375 | 5819 | -0,1115 | 303 | -1 | -0,4315 | 342     | -1 | -0,5575 | 4136   | 1 | -0,1260 |
| HNRNPA1P33    | 5766  | -0,0924 | 269  | 0,2537  | 1400 | 0,3255  | 331 | -1 | 0,4179  | 902     | -1 | 0,3462  | 7369   | 1 | -0,0718 |
| STC2          | 1756  | -0,2138 | 15   | 0,6693  | 3014 | 0,1950  | 351 | -1 | 0,4088  | 84      | -1 | 0,8831  | 566    | 1 | 0,4743  |
| C15orf52      | 1832  | -0,2081 | 2483 | 0,0934  | 2958 | 0,1971  | 359 | -1 | 0,4053  | 1161    | -1 | 0,3015  | 5229   | 1 | -0,1037 |
| KIRREL        | 5536  | -0,0959 | 153  | 0,3194  | 1516 | 0,3085  | 362 | -1 | 0,4044  | 645     | -1 | 0,4153  | 19935  | 1 | 0,0109  |
| MPP2          | 6483  | 0,0821  | 1491 | -0,1243 | 1431 | -0,3209 | 365 | -1 | -0,4030 | 2277    | -1 | -0,2065 | 2284   | 1 | 0,1965  |
| STX8          | 3489  | 0,1384  | 659  | -0,1785 | 1981 | -0,2599 | 371 | -1 | -0,3983 | 1061    | -1 | -0,3169 | 6611   | 1 | 0,0814  |
| SUPT4H1       | 10140 | 0,0454  | 794  | -0,1647 | 1238 | -0,3506 | 372 | -1 | -0,3960 | 2226    | -1 | -0,2101 | 2488   | 1 | 0,1859  |

|            |       |         |       |         |      |         |     |    |         |       |    |         |       |   |         |
|------------|-------|---------|-------|---------|------|---------|-----|----|---------|-------|----|---------|-------|---|---------|
| ELOVL4     | 5377  | 0,0986  | 1908  | -0,1091 | 1612 | -0,2971 | 374 | -1 | -0,3957 | 2263  | -1 | -0,2076 | 2447  | 1 | 0,1880  |
| TMEM154    | 4585  | 0,1123  | 1485  | -0,1246 | 1795 | -0,2784 | 387 | -1 | -0,3907 | 1804  | -1 | -0,2369 | 3202  | 1 | 0,1538  |
| AC005682.5 | 26910 | -0,0022 | 7159  | 0,0353  | 1063 | 0,3850  | 398 | -1 | 0,3872  | 11318 | -1 | 0,0375  | 985   | 1 | -0,3497 |
| OGFRL1     | 7162  | -0,0734 | 373   | 0,2234  | 1531 | 0,3063  | 422 | -1 | 0,3797  | 1196  | -1 | 0,2968  | 6495  | 1 | -0,0829 |
| RSPO3      | 929   | -0,3134 | 13    | 0,6800  | 9044 | 0,0644  | 427 | -1 | 0,3778  | 54    | -1 | 0,9934  | 327   | 1 | 0,6156  |
| LGALS3     | 19455 | 0,0111  | 397   | -0,2186 | 1210 | -0,3564 | 463 | -1 | -0,3675 | 1901  | -1 | -0,2297 | 3717  | 1 | 0,1378  |
| TRIP12     | 25778 | -0,0042 | 270   | 0,2537  | 1221 | 0,3541  | 491 | -1 | 0,3582  | 1565  | -1 | 0,2579  | 5410  | 1 | -0,1003 |
| GCA        | 24629 | 0,0063  | 1103  | -0,1431 | 1241 | -0,3496 | 501 | -1 | -0,3559 | 3636  | -1 | -0,1494 | 2133  | 1 | 0,2065  |
| BDKRB2     | 13081 | -0,0289 | 627   | 0,1824  | 1395 | 0,3261  | 505 | -1 | 0,3550  | 2204  | -1 | 0,2113  | 3507  | 1 | -0,1437 |
| SAT1       | 9216  | 0,0526  | 27    | -0,5391 | 1584 | -0,3005 | 512 | -1 | -0,3532 | 287   | -1 | -0,5917 | 1760  | 1 | -0,2385 |
| AFAP1L2    | 7839  | 0,0661  | 1131  | -0,1417 | 1815 | -0,2754 | 552 | -1 | -0,3414 | 2261  | -1 | -0,2078 | 3861  | 1 | 0,1337  |
| RAP1GAP2   | 1857  | 0,2061  | 492   | -0,2016 | 5090 | -0,1271 | 584 | -1 | -0,3332 | 667   | -1 | -0,4077 | 7166  | 1 | -0,0745 |
| SEC14L4    | 3136  | 0,1489  | 4881  | -0,0556 | 3355 | -0,1806 | 600 | -1 | -0,3295 | 2324  | -1 | -0,2045 | 4181  | 1 | 0,1250  |
| SPOCD1     | 6563  | -0,0812 | 1407  | 0,1278  | 2148 | 0,2464  | 608 | -1 | 0,3276  | 2246  | -1 | 0,2090  | 4471  | 1 | -0,1186 |
| TRABD2A    | 1441  | 0,2442  | 351   | -0,2289 | 7660 | -0,0820 | 611 | -1 | -0,3261 | 490   | -1 | -0,4731 | 3406  | 1 | -0,1469 |
| PARP8      | 5157  | 0,1019  | 3328  | -0,0764 | 2611 | -0,2153 | 668 | -1 | -0,3172 | 2837  | -1 | -0,1783 | 3676  | 1 | 0,1389  |
| PCTP       | 8403  | 0,0602  | 593   | -0,1862 | 2018 | -0,2563 | 672 | -1 | -0,3165 | 1688  | -1 | -0,2464 | 7504  | 1 | 0,0701  |
| CALCOCO2   | 5271  | 0,1002  | 662   | -0,1781 | 2597 | -0,2160 | 676 | -1 | -0,3162 | 1364  | -1 | -0,2783 | 11284 | 1 | 0,0379  |
| HID1       | 14094 | 0,0250  | 377   | -0,2219 | 1714 | -0,2869 | 694 | -1 | -0,3119 | 1680  | -1 | -0,2469 | 7946  | 1 | 0,0651  |
| MYH14      | 3896  | 0,1277  | 1035  | -0,1464 | 3324 | -0,1822 | 707 | -1 | -0,3098 | 1403  | -1 | -0,2741 | 11605 | 1 | 0,0357  |
| NFIB       | 3231  | -0,1453 | 288   | 0,2467  | 3957 | 0,1590  | 738 | -1 | 0,3044  | 725   | -1 | 0,3920  | 6184  | 1 | 0,0876  |
| CCND3      | 11198 | 0,0382  | 3285  | -0,0771 | 1924 | -0,2649 | 743 | -1 | -0,3031 | 4968  | -1 | -0,1153 | 2452  | 1 | 0,1878  |
| CLU        | 11793 | 0,0355  | 997   | -0,1490 | 1977 | -0,2602 | 793 | -1 | -0,2957 | 2697  | -1 | -0,1846 | 4840  | 1 | 0,1111  |
| NARF       | 5170  | 0,1017  | 436   | -0,2109 | 3038 | -0,1936 | 794 | -1 | -0,2954 | 1093  | -1 | -0,3127 | 16457 | 1 | -0,0173 |
| DHX40      | 27953 | 0,0014  | 176   | -0,3038 | 1677 | -0,2911 | 817 | -1 | -0,2925 | 1140  | -1 | -0,3052 | 18258 | 1 | -0,0127 |
| TRHDE-AS1  | 24452 | -0,0066 | 5295  | 0,0513  | 1766 | 0,2816  | 850 | -1 | 0,2882  | 8854  | -1 | 0,0579  | 1860  | 1 | -0,2303 |
| GLOD4      | 26944 | 0,0019  | 434   | -0,2111 | 1729 | -0,2855 | 859 | -1 | -0,2874 | 2175  | -1 | -0,2130 | 7172  | 1 | 0,0744  |
| FDFT1      | 13005 | 0,0293  | 150   | -0,3209 | 2024 | -0,2556 | 876 | -1 | -0,2849 | 883   | -1 | -0,3502 | 7933  | 1 | -0,0653 |
| BICD1      | 17094 | -0,0158 | 2393  | 0,0953  | 1900 | 0,2671  | 885 | -1 | 0,2830  | 5159  | -1 | 0,1112  | 2780  | 1 | -0,1718 |
| CNTROB     | 20241 | 0,0095  | 2645  | -0,0893 | 1835 | -0,2734 | 886 | -1 | -0,2829 | 5791  | -1 | -0,0989 | 2530  | 1 | 0,1841  |
| BECN1      | 4328  | 0,1179  | 581   | -0,1880 | 3780 | -0,1648 | 889 | -1 | -0,2827 | 1137  | -1 | -0,3058 | 14453 | 1 | -0,0231 |
| WNT5A      | 5213  | 0,1012  | 3643  | -0,0717 | 3459 | -0,1769 | 929 | -1 | -0,2781 | 2970  | -1 | -0,1729 | 5144  | 1 | 0,1052  |
| BAIAP2-AS1 | 26584 | 0,0031  | 16097 | -0,0070 | 1821 | -0,2746 | 934 | -1 | -0,2777 | 19649 | -1 | -0,0100 | 1491  | 1 | 0,2677  |

|               |       |         |       |         |       |         |      |    |         |         |    |         |       |   |         |
|---------------|-------|---------|-------|---------|-------|---------|------|----|---------|---------|----|---------|-------|---|---------|
| MOCS1         | 9657  | 0,0489  | 2091  | -0,1033 | 2400  | -0,2281 | 937  | -1 | -0,2771 | 3546    | -1 | -0,1523 | 4192  | 1 | 0,1248  |
| ZBTB18        | 1953  | -0,1994 | 107   | 0,3711  | 8026  | 0,0769  | 943  | -1 | 0,2763  | 319     | -1 | 0,5706  | 1292  | 1 | 0,2943  |
| ABCG1         | 11990 | 0,0345  | 3211  | -0,0786 | 2223  | -0,2416 | 944  | -1 | -0,2761 | 5086    | -1 | -0,1131 | 2973  | 1 | 0,1630  |
| MAP3K8        | 26679 | 0,0024  | 367   | -0,2241 | 1875  | -0,2696 | 980  | -1 | -0,2720 | 1952    | -1 | -0,2266 | 10167 | 1 | 0,0454  |
| ANKRD29       | 10304 | 0,0444  | 12964 | -0,0114 | 2466  | -0,2244 | 1007 | -1 | -0,2687 | 9049    | -1 | -0,0558 | 2054  | 1 | 0,2130  |
| PDK2          | 15235 | 0,0205  | 1548  | -0,1214 | 2206  | -0,2426 | 1063 | -1 | -0,2630 | 3900    | -1 | -0,1418 | 4353  | 1 | 0,1212  |
| ADAMTS16      | 9304  | -0,0518 | 735   | 0,1704  | 2776  | 0,2070  | 1099 | -1 | 0,2588  | 2007    | -1 | 0,2222  | 11499 | 1 | -0,0366 |
| LINC00592     | 7924  | 0,0650  | 3327  | -0,0764 | 3148  | -0,1890 | 1156 | -1 | -0,2540 | 3913    | -1 | -0,1415 | 4776  | 1 | 0,1125  |
| ASPSR1        | 24707 | 0,0061  | 2987  | -0,0827 | 2243  | -0,2402 | 1253 | -1 | -0,2463 | 6412    | -1 | -0,0888 | 3100  | 1 | 0,1575  |
| SLC16A13      | 25389 | 0,0053  | 3288  | -0,0770 | 2355  | -0,2320 | 1366 | -1 | -0,2374 | 6822    | -1 | -0,0824 | 3167  | 1 | 0,1550  |
| CACNG8        | 11997 | 0,0344  | 4860  | -0,0558 | 2903  | -0,1997 | 1411 | -1 | -0,2341 | 6326    | -1 | -0,0903 | 3503  | 1 | 0,1439  |
| MAOA          | 19967 | 0,0107  | 2848  | -0,0852 | 2563  | -0,2187 | 1483 | -1 | -0,2294 | 5982    | -1 | -0,0959 | 3865  | 1 | 0,1335  |
| ZNF711        | 7761  | 0,0668  | 4238  | -0,0629 | 4137  | -0,1531 | 1642 | -1 | -0,2199 | 4324    | -1 | -0,1298 | 6030  | 1 | 0,0902  |
| FMN1          | 2992  | 0,1534  | 410   | -0,2161 | 9088  | -0,0640 | 1682 | -1 | -0,2175 | 800     | -1 | -0,3695 | 3261  | 1 | -0,1520 |
| NUDT14        | 16746 | 0,0175  | 3145  | -0,0798 | 2964  | -0,1969 | 1741 | -1 | -0,2145 | 5873    | -1 | -0,0973 | 4537  | 1 | 0,1171  |
| MKI67         | 2097  | -0,1908 | 327   | 0,2371  | 15449 | 0,0232  | 1750 | -1 | 0,2140  | 613     | -1 | 0,4279  | 2044  | 1 | 0,2139  |
| HOGA1         | 13973 | 0,0255  | 5741  | -0,0471 | 3184  | -0,1872 | 1781 | -1 | -0,2127 | 7536    | -1 | -0,0726 | 3624  | 1 | 0,1402  |
| SLC16A7       | 5918  | -0,0904 | 1330  | 0,1310  | 5370  | 0,1208  | 1802 | -1 | 0,2113  | 2021    | -1 | 0,2214  | 20216 | 1 | 0,0101  |
| ANKRD36C      | 18153 | -0,0141 | 25684 | 0,0015  | 2975  | 0,1964  | 1813 | -1 | 0,2104  | 17000   | -1 | 0,0156  | 2319  | 1 | -0,1948 |
| ADA           | 2836  | 0,1586  | 2556  | -0,0916 | 10769 | -0,0485 | 1869 | -1 | -0,2071 | 1645    | -1 | -0,2502 | 10515 | 1 | -0,0431 |
| FHL1          | 26072 | 0,0039  | 129   | -0,3418 | 2865  | -0,2018 | 1898 | -1 | -0,2057 | 907     | -1 | -0,3457 | 3628  | 1 | -0,1400 |
| FRMD4B        | 20018 | 0,0103  | 5463  | -0,0498 | 3129  | -0,1897 | 2028 | -1 | -0,2000 | 8649    | -1 | -0,0601 | 3632  | 1 | 0,1399  |
| BASP1         | 6622  | 0,0804  | 261   | -0,2570 | 5744  | -0,1129 | 2183 | -1 | -0,1933 | 952     | -1 | -0,3374 | 3498  | 1 | -0,1440 |
| SAP30L-AS1    | 14185 | -0,0241 | 6023  | 0,0447  | 3724  | 0,1665  | 2242 | -1 | 0,1907  | 7859    | -1 | 0,0688  | 4326  | 1 | -0,1219 |
| GRB2          | 9388  | 0,0513  | 1286  | -0,1333 | 4683  | -0,1374 | 2287 | -1 | -0,1887 | 2698    | -1 | -0,1845 | 24532 | 1 | 0,0041  |
| STXBP5L       | 22387 | -0,0071 | 4763  | 0,0569  | 3430  | 0,1780  | 2372 | -1 | 0,1850  | 8290    | -1 | 0,0640  | 4361  | 1 | -0,1211 |
| MST4          | 7304  | 0,0720  | 839   | -0,1616 | 5886  | -0,1100 | 2436 | -1 | -0,1820 | 1844    | -1 | -0,2336 | 9388  | 1 | -0,0516 |
| RP11-443A13.5 | 10226 | -0,0450 | 9199  | 0,0235  | 4731  | 0,1362  | 2450 | -1 | 0,1813  | 7885    | -1 | 0,0685  | 4765  | 1 | -0,1127 |
| ZNF468        | 25314 | -0,0058 | 3294  | 0,0770  | 3560  | 0,1730  | 2513 | -1 | 0,1788  | 6795    | -1 | 0,0828  | 5657  | 1 | -0,0960 |
| RP11-214O1.2  | 25954 | -0,0041 | 10632 | 0,0178  | 3521  | 0,1744  | 2519 | -1 | 0,1785  | 14719,5 | -1 | 0,0219  | 3123  | 1 | -0,1566 |
| PXDNL         | 13577 | -0,0275 | 3653  | 0,0715  | 4304  | 0,1477  | 2589 | -1 | 0,1753  | 5781    | -1 | 0,0991  | 7028  | 1 | -0,0762 |
| TNFAIP3       | 2763  | -0,1620 | 668   | 0,1775  | 20895 | 0,0120  | 2631 | -1 | 0,1740  | 938     | -1 | 0,3395  | 2915  | 1 | 0,1655  |
| NR2F2         | 4030  | -0,1244 | 383   | 0,2212  | 11347 | 0,0433  | 2815 | -1 | 0,1677  | 909     | -1 | 0,3456  | 2659  | 1 | 0,1779  |



|               |       |         |       |         |       |         |        |    |         |         |    |         |         |    |         |
|---------------|-------|---------|-------|---------|-------|---------|--------|----|---------|---------|----|---------|---------|----|---------|
| P2RY6         | 28257 | 0,0003  | 835   | -0,1620 | 3701  | -0,1674 | 2817   | -1 | -0,1677 | 3256    | -1 | -0,1623 | 24040   | 1  | 0,0054  |
| DOK4          | 6689  | 0,0794  | 3917  | -0,0675 | 7197  | -0,0881 | 2822   | -1 | -0,1675 | 3725    | -1 | -0,1469 | 15305   | 1  | 0,0205  |
| RUNX2         | 7134  | -0,0738 | 328   | 0,2367  | 7481  | 0,0843  | 3109   | -1 | 0,1581  | 1110    | -1 | 0,3105  | 3254    | 1  | 0,1523  |
| BLID          | 19201 | -0,0116 | 12876 | 0,0115  | 4726  | 0,1364  | 3467   | -1 | 0,1479  | 14346,5 | -1 | 0,0231  | 4187,5  | 1  | -0,1248 |
| NABP1         | 28259 | -0,0003 | 210   | 0,2780  | 4741  | 0,1360  | 3908   | -1 | 0,1363  | 1363    | -1 | 0,2783  | 3564    | 1  | 0,1420  |
| ZNF736        | 18079 | -0,0149 | 4971  | 0,0547  | 5381  | 0,1207  | 3950   | -1 | 0,1355  | 7794    | -1 | 0,0695  | 7862    | 1  | -0,0660 |
| HNRNPU-AS1    | 4769  | -0,1086 | 5504  | 0,0493  | 15596 | 0,0224  | 4150   | -1 | 0,1310  | 3386,5  | -1 | 0,1579  | 13395   | 1  | 0,0269  |
| RPL9P28       | 24323 | -0,0066 | 19976 | 0,0039  | 5484  | 0,1184  | 4400   | -1 | 0,1250  | 19298,5 | -1 | 0,0105  | 4674    | 1  | -0,1145 |
| RAB42         | 25791 | 0,0041  | 4790  | -0,0566 | 5415  | -0,1199 | 4449   | -1 | -0,1240 | 8592    | -1 | -0,0607 | 8117    | 1  | 0,0633  |
| ANKRD36       | 12557 | -0,0310 | 9425  | 0,0226  | 7062  | 0,0902  | 4589   | -1 | 0,1212  | 9296    | -1 | 0,0536  | 7742    | 1  | -0,0675 |
| B3GNT3        | 11451 | 0,0370  | 6769  | -0,0384 | 7756  | -0,0806 | 4776   | -1 | -0,1176 | 7299    | -1 | -0,0753 | 10631,5 | 1  | 0,0422  |
| NTRK3-AS1     | 16840 | -0,0168 | 4568  | 0,0590  | 7216  | 0,0878  | 5457,5 | -1 | 0,1045  | 7275    | -1 | 0,0758  | 13033   | 1  | -0,0287 |
| SDK1          | 5428  | -0,0977 | 1109  | 0,1429  | 27310 | 0,0013  | 5796   | -1 | 0,0990  | 1757    | -1 | 0,2406  | 3573    | 1  | 0,1417  |
| PID1          | 4923  | -0,1058 | 3111  | -0,0805 | 561   | 0,5454  | 97     | -1 | 0,6512  | 13796   | 1  | 0,0254  | 317     | -1 | -0,6259 |
| GALNT16       | 14154 | -0,0244 | 15592 | -0,0074 | 569   | 0,5438  | 147    | -1 | 0,5682  | 16458   | 1  | 0,0171  | 430     | -1 | -0,5512 |
| OLFML2A       | 12380 | 0,0320  | 12355 | 0,0129  | 915   | -0,4222 | 264    | -1 | -0,4542 | 15544   | 1  | -0,0191 | 671     | -1 | 0,4351  |
| RARB          | 5303  | 0,0997  | 2345  | 0,0966  | 8272  | -0,0737 | 2645   | -1 | -0,1735 | 27899   | 1  | -0,0031 | 2815    | -1 | 0,1704  |
| CLDN2         | 6175  | 0,0865  | 40    | 0,4855  | 7967  | -0,0776 | 2913   | -1 | -0,1641 | 702     | 1  | 0,3991  | 409     | -1 | 0,5632  |
| RP11-115C10.1 | 11756 | -0,0358 | 27827 | -0,0004 | 5971  | 0,1082  | 3623   | -1 | 0,1440  | 11708   | 1  | 0,0353  | 4959    | -1 | -0,1087 |
| MEGF6         | 8594  | 0,0580  | 254   | 0,2595  | 16734 | -0,0190 | 7419   | -1 | -0,0770 | 2366    | 1  | 0,2015  | 1400    | -1 | 0,2785  |
| CNR1          | 11414 | 0,0372  | 1285  | 0,1333  | 20931 | -0,0116 | 10247  | -1 | -0,0488 | 5971    | 1  | 0,0961  | 3475    | -1 | 0,1449  |
| CXCL5         | 25    | -1,1584 | 24    | 0,5609  | 1616  | -0,2968 | 33     | 1  | 0,8616  | 2       | -1 | 1,7193  | 127     | -1 | 0,8577  |
| CD300C        | 5357  | 0,0989  | 17635 | -0,0052 | 175   | 0,8760  | 52     | 1  | 0,7770  | 5498    | -1 | -0,1042 | 117     | -1 | -0,8812 |
| JUP           | 115   | 0,7492  | 4     | -1,0602 | 13049 | 0,0328  | 68     | 1  | -0,7164 | 1       | -1 | -1,8095 | 55      | -1 | -1,0930 |
| SEMA7A        | 204   | 0,6386  | 8958  | -0,0247 | 40    | 1,3275  | 79     | 1  | 0,6889  | 219     | -1 | -0,6633 | 25      | -1 | -1,3522 |
| RET           | 6433  | 0,0827  | 13887 | -0,0098 | 296   | 0,7163  | 106    | 1  | 0,6336  | 6192    | -1 | -0,0925 | 223     | -1 | -0,7261 |
| SLFN5         | 130   | 0,7261  | 845   | -0,1609 | 6450  | 0,1000  | 112    | 1  | -0,6261 | 82      | -1 | -0,8870 | 1548    | -1 | -0,2609 |
| HAPLN3        | 189   | 0,6602  | 810   | -0,1635 | 8574  | 0,0702  | 134    | 1  | -0,5900 | 111     | -1 | -0,8237 | 1824    | -1 | -0,2337 |
| SYT1          | 216   | 0,6271  | 56    | -0,4542 | 6635  | 0,0973  | 178    | 1  | -0,5298 | 38      | -1 | -1,0812 | 428     | -1 | -0,5514 |
| WNT7A         | 170   | 0,6824  | 1376  | -0,1293 | 2829  | 0,2034  | 234    | 1  | -0,4790 | 120     | -1 | -0,8117 | 1067    | -1 | -0,3327 |
| THBS1         | 52    | 0,9248  | 5331  | -0,0510 | 38    | 1,3676  | 283    | 1  | 0,4427  | 57      | -1 | -0,9758 | 18      | -1 | -1,4185 |
| SPHK1         | 50    | 0,9543  | 6584  | -0,0399 | 35    | 1,3954  | 285    | 1  | 0,4411  | 53      | -1 | -0,9943 | 17      | -1 | -1,4353 |
| XYLT1         | 13    | 1,3472  | 2446  | -0,0942 | 157   | 0,9131  | 299    | 1  | -0,4340 | 16      | -1 | -1,4414 | 70      | -1 | -1,0074 |

|               |      |         |       |         |       |         |     |   |         |      |    |         |      |    |         |
|---------------|------|---------|-------|---------|-------|---------|-----|---|---------|------|----|---------|------|----|---------|
| GPAM          | 3572 | 0,1362  | 10316 | -0,0191 | 532   | 0,5556  | 327 | 1 | 0,4194  | 3474 | -1 | -0,1552 | 386  | -1 | -0,5746 |
| ANGPTL4       | 15   | 1,3162  | 3608  | -0,0723 | 11    | 1,7263  | 347 | 1 | 0,4101  | 17   | -1 | -1,3885 | 6    | -1 | -1,7986 |
| KLHDC8A       | 4450 | 0,1155  | 25805 | -0,0014 | 615   | 0,5210  | 356 | 1 | 0,4055  | 4882 | -1 | -0,1169 | 475  | -1 | -0,5224 |
| NKD1          | 2100 | 0,1907  | 21976 | -0,0032 | 481   | 0,5823  | 383 | 1 | 0,3916  | 2516 | -1 | -0,1939 | 366  | -1 | -0,5855 |
| PRDM1         | 234  | 0,6079  | 935   | -0,1535 | 2345  | 0,2326  | 434 | 1 | -0,3753 | 151  | -1 | -0,7614 | 821  | -1 | -0,3862 |
| FOXS1         | 369  | 0,5041  | 20217 | -0,0034 | 174   | 0,8786  | 440 | 1 | 0,3745  | 425  | -1 | -0,5075 | 116  | -1 | -0,8820 |
| AKR1C1        | 64   | -0,8596 | 3979  | 0,0666  | 57    | -1,2317 | 446 | 1 | -0,3721 | 71   | -1 | 0,9261  | 32   | -1 | 1,2982  |
| SLC19A2       | 608  | 0,3940  | 8498  | -0,0271 | 253   | 0,7639  | 454 | 1 | 0,3699  | 630  | -1 | -0,4211 | 171  | -1 | -0,7910 |
| RHOBTB3       | 645  | -0,3826 | 357   | 0,2269  | 16125 | -0,0218 | 486 | 1 | 0,3609  | 271  | -1 | 0,6096  | 1651 | -1 | 0,2487  |
| GFRA1         | 308  | -0,5469 | 678   | 0,1765  | 3066  | -0,1922 | 508 | 1 | 0,3548  | 178  | -1 | 0,7234  | 901  | -1 | 0,3687  |
| STRA6         | 332  | 0,5250  | 116   | -0,3546 | 3543  | 0,1736  | 516 | 1 | -0,3514 | 87   | -1 | -0,8796 | 465  | -1 | -0,5282 |
| JAG1          | 107  | 0,7629  | 1450  | -0,1261 | 71    | 1,1123  | 528 | 1 | 0,3494  | 81   | -1 | -0,8890 | 35   | -1 | -1,2384 |
| KBTBD11       | 1006 | 0,2991  | 8092  | -0,0294 | 381   | 0,6425  | 549 | 1 | 0,3435  | 1002 | -1 | -0,3284 | 275  | -1 | -0,6719 |
| MEG3          | 42   | 0,9882  | 2178  | -0,1011 | 376   | 0,6487  | 556 | 1 | -0,3395 | 37   | -1 | -1,0893 | 202  | -1 | -0,7499 |
| FN1           | 40   | 0,9963  | 12    | -0,7143 | 358   | 0,6592  | 569 | 1 | -0,3371 | 4    | -1 | -1,7107 | 24   | -1 | -1,3735 |
| TCF4          | 1417 | 0,2466  | 8267  | -0,0285 | 510   | 0,5677  | 643 | 1 | 0,3211  | 1395 | -1 | -0,2750 | 351  | -1 | -0,5962 |
| GSN           | 292  | 0,5543  | 251   | -0,2602 | 2222  | 0,2417  | 690 | 1 | -0,3126 | 115  | -1 | -0,8145 | 511  | -1 | -0,5019 |
| LINC00704     | 197  | 0,6493  | 7201  | -0,0350 | 1312  | 0,3372  | 691 | 1 | -0,3121 | 206  | -1 | -0,6843 | 882  | -1 | -0,3722 |
| RP11-572C15.6 | 16   | 1,2885  | 5872  | -0,0459 | 23    | 1,5946  | 731 | 1 | 0,3061  | 19   | -1 | -1,3344 | 10   | -1 | -1,6406 |
| CEBPD         | 2276 | -0,1818 | 5863  | 0,0459  | 702   | -0,4878 | 732 | 1 | -0,3060 | 1930 | -1 | 0,2278  | 458  | -1 | 0,5337  |
| STARD4        | 442  | 0,4636  | 165   | -0,3100 | 3987  | 0,1580  | 734 | 1 | -0,3056 | 144  | -1 | -0,7736 | 579  | -1 | -0,4680 |
| AKR1B15       | 908  | -0,3185 | 6032  | 0,0446  | 422   | -0,6150 | 787 | 1 | -0,2965 | 826  | -1 | 0,3631  | 287  | -1 | 0,6596  |
| GRAMD1B       | 513  | 0,4269  | 59    | -0,4492 | 4926  | 0,1310  | 790 | 1 | -0,2958 | 88   | -1 | -0,8760 | 375  | -1 | -0,5802 |
| SOGA2         | 2497 | -0,1719 | 2919  | 0,0840  | 774   | -0,4613 | 837 | 1 | -0,2895 | 1589 | -1 | 0,2558  | 435  | -1 | 0,5453  |
| PIK3AP1       | 195  | 0,6529  | 4646  | -0,0581 | 1175  | 0,3648  | 854 | 1 | -0,2880 | 188  | -1 | -0,7110 | 710  | -1 | -0,4229 |
| LDLRAD4       | 133  | 0,7226  | 14698 | -0,0086 | 111   | 1,0093  | 863 | 1 | 0,2867  | 169  | -1 | -0,7311 | 68   | -1 | -1,0179 |
| PTK7          | 1157 | 0,2756  | 14699 | -0,0086 | 517   | 0,5610  | 871 | 1 | 0,2854  | 1306 | -1 | -0,2842 | 398  | -1 | -0,5696 |
| TNFAIP6       | 32   | 1,0605  | 1198  | -0,1382 | 244   | 0,7754  | 874 | 1 | -0,2851 | 25   | -1 | -1,1987 | 106  | -1 | -0,9136 |
| MOK           | 435  | -0,4673 | 43    | 0,4810  | 3284  | -0,1832 | 880 | 1 | 0,2841  | 64   | -1 | 0,9483  | 281  | -1 | 0,6642  |
| DGKA          | 692  | 0,3689  | 738   | -0,1701 | 7147  | 0,0889  | 908 | 1 | -0,2801 | 370  | -1 | -0,5390 | 1563 | -1 | -0,2590 |
| ARID5A        | 3295 | 0,1438  | 14425 | -0,0091 | 911   | 0,4228  | 918 | 1 | 0,2790  | 3537 | -1 | -0,1528 | 686  | -1 | -0,4318 |
| IGFBP7        | 83   | 0,8137  | 201   | -0,2828 | 586   | 0,5356  | 928 | 1 | -0,2781 | 31   | -1 | -1,0965 | 155  | -1 | -0,8183 |
| WNT7B         | 94   | -0,7896 | 16830 | 0,0065  | 641   | -0,5115 | 930 | 1 | 0,2781  | 126  | -1 | 0,7962  | 487  | -1 | 0,5181  |

|         |      |         |       |         |       |         |      |   |         |        |    |         |        |    |         |
|---------|------|---------|-------|---------|-------|---------|------|---|---------|--------|----|---------|--------|----|---------|
| SEL1L3  | 239  | 0,6024  | 7551  | -0,0327 | 1361  | 0,3312  | 987  | 1 | -0,2712 | 234    | -1 | -0,6351 | 923    | -1 | -0,3639 |
| EFHD2   | 90   | -0,7974 | 1800  | 0,1120  | 593   | -0,5311 | 1034 | 1 | 0,2663  | 78     | -1 | 0,9094  | 304    | -1 | 0,6432  |
| CYP1B1  | 179  | -0,6678 | 120   | 0,3534  | 1004  | -0,4023 | 1039 | 1 | 0,2655  | 47     | -1 | 1,0212  | 196    | -1 | 0,7556  |
| ITGA1   | 78   | 0,8185  | 17336 | -0,0056 | 523   | 0,5585  | 1091 | 1 | -0,2600 | 110    | -1 | -0,8241 | 408    | -1 | -0,5641 |
| PGM2L1  | 178  | 0,6702  | 126   | -0,3441 | 956   | 0,4141  | 1127 | 1 | -0,2561 | 49     | -1 | -1,0143 | 191    | -1 | -0,7582 |
| KCNJ6   | 1044 | 0,2927  | 13019 | -0,0112 | 11996 | 0,0391  | 1163 | 1 | -0,2535 | 1145   | -1 | -0,3039 | 9567,5 | -1 | -0,0504 |
| PLEK2   | 98   | 0,7819  | 3749  | -0,0702 | 102   | 1,0327  | 1191 | 1 | 0,2508  | 101    | -1 | -0,8521 | 53     | -1 | -1,1029 |
| NLRP1   | 106  | 0,7634  | 20048 | -0,0038 | 637   | 0,5131  | 1202 | 1 | -0,2502 | 149    | -1 | -0,7671 | 489    | -1 | -0,5169 |
| AHR     | 275  | -0,5649 | 22508 | 0,0023  | 211   | -0,8126 | 1229 | 1 | -0,2477 | 322    | -1 | 0,5673  | 157    | -1 | 0,8150  |
| GPR115  | 159  | 0,6923  | 2708  | -0,0878 | 842   | 0,4451  | 1238 | 1 | -0,2471 | 140    | -1 | -0,7801 | 460    | -1 | -0,5329 |
| RNF152  | 6588 | 0,0809  | 24997 | -0,0020 | 1390  | 0,3271  | 1256 | 1 | 0,2462  | 6785,5 | -1 | -0,0829 | 1090   | -1 | -0,3291 |
| NDRG1   | 713  | 0,3620  | 563   | -0,1907 | 5368  | 0,1209  | 1309 | 1 | -0,2412 | 351    | -1 | -0,5527 | 1183   | -1 | -0,3115 |
| BMF     | 633  | 0,3870  | 12755 | -0,0119 | 408   | 0,6253  | 1357 | 1 | 0,2383  | 703    | -1 | -0,3989 | 306    | -1 | -0,6371 |
| PCSK9   | 6338 | -0,0842 | 12972 | 0,0114  | 1428  | -0,3213 | 1370 | 1 | -0,2371 | 6002   | -1 | 0,0955  | 1068   | -1 | 0,3326  |
| CSF1    | 212  | -0,6310 | 1050  | 0,1457  | 1032  | -0,3954 | 1387 | 1 | 0,2356  | 141    | -1 | 0,7767  | 445    | -1 | 0,5411  |
| DOCK4   | 81   | 0,8145  | 1788  | -0,1123 | 95    | 1,0479  | 1424 | 1 | 0,2334  | 70     | -1 | -0,9268 | 43     | -1 | -1,1602 |
| STC1    | 38   | 1,0163  | 1145  | -0,1410 | 234   | 0,7834  | 1433 | 1 | -0,2329 | 28     | -1 | -1,1573 | 98     | -1 | -0,9244 |
| APBB2   | 463  | 0,4473  | 28102 | 0,0000  | 336   | 0,6773  | 1476 | 1 | 0,2300  | 554    | -1 | -0,4473 | 270    | -1 | -0,6773 |
| NFKBIZ  | 158  | 0,6948  | 1755  | -0,1136 | 150   | 0,9242  | 1484 | 1 | 0,2294  | 122    | -1 | -0,8084 | 63     | -1 | -1,0378 |
| NEK7    | 367  | 0,5083  | 10452 | -0,0185 | 276   | 0,7362  | 1509 | 1 | 0,2279  | 386    | -1 | -0,5268 | 200    | -1 | -0,7547 |
| SH3RF2  | 1374 | -0,2503 | 301   | 0,2446  | 15425 | -0,0234 | 1527 | 1 | 0,2269  | 444    | -1 | 0,4949  | 1488   | -1 | 0,2680  |
| CLDN1   | 174  | -0,6768 | 128   | 0,3418  | 812   | -0,4519 | 1559 | 1 | 0,2249  | 48     | -1 | 1,0187  | 168    | -1 | 0,7937  |
| MLXIP   | 75   | 0,8225  | 5963  | -0,0451 | 97    | 1,0472  | 1568 | 1 | 0,2246  | 91     | -1 | -0,8676 | 56     | -1 | -1,0923 |
| MAF     | 236  | 0,6049  | 11307 | -0,0156 | 1080  | 0,3818  | 1588 | 1 | -0,2231 | 257    | -1 | -0,6205 | 782    | -1 | -0,3974 |
| LGMN    | 164  | 0,6865  | 1467  | -0,1251 | 766   | 0,4639  | 1599 | 1 | -0,2225 | 121    | -1 | -0,8116 | 361    | -1 | -0,5891 |
| LMCD1   | 499  | 0,4351  | 2696  | -0,0881 | 361   | 0,6574  | 1608 | 1 | 0,2223  | 393    | -1 | -0,5233 | 206    | -1 | -0,7456 |
| AJUBA   | 70   | -0,8409 | 186   | 0,2971  | 419   | -0,6187 | 1610 | 1 | 0,2222  | 29     | -1 | 1,1380  | 102    | -1 | 0,9158  |
| PARD6B  | 573  | -0,4073 | 4543  | 0,0594  | 402   | -0,6294 | 1615 | 1 | -0,2220 | 513    | -1 | 0,4668  | 257    | -1 | 0,6888  |
| TRNP1   | 66   | -0,8468 | 3185  | 0,0790  | 409   | -0,6249 | 1620 | 1 | 0,2219  | 72     | -1 | 0,9258  | 247    | -1 | 0,7039  |
| GAL3ST1 | 5887 | -0,0908 | 10129 | 0,0197  | 1489  | -0,3121 | 1625 | 1 | -0,2213 | 5188   | -1 | 0,1106  | 1073   | -1 | 0,3318  |
| PHF15   | 439  | -0,4658 | 4218  | 0,0631  | 333   | -0,6829 | 1688 | 1 | -0,2170 | 383    | -1 | 0,5289  | 205    | -1 | 0,7460  |
| WNT5B   | 2    | 1,6842  | 24690 | -0,0022 | 29    | 1,4692  | 1731 | 1 | -0,2150 | 5      | -1 | -1,6864 | 15     | -1 | -1,4715 |
| LMNA    | 4221 | -0,1202 | 6325  | 0,0419  | 1332  | -0,3348 | 1739 | 1 | -0,2146 | 3261   | -1 | 0,1621  | 861    | -1 | 0,3767  |

|              |      |         |       |         |      |         |      |   |         |      |    |         |      |    |         |
|--------------|------|---------|-------|---------|------|---------|------|---|---------|------|----|---------|------|----|---------|
| AL132709.5   | 173  | 0,6786  | 8349  | -0,0280 | 758  | 0,4676  | 1805 | 1 | -0,2110 | 191  | -1 | -0,7066 | 522  | -1 | -0,4956 |
| RP11-401P9.4 | 7577 | 0,0691  | 11731 | -0,0144 | 1782 | 0,2800  | 1808 | 1 | 0,2110  | 6751 | -1 | -0,0834 | 1290 | -1 | -0,2944 |
| RAB11FIP1    | 1019 | -0,2973 | 1922  | 0,1086  | 650  | -0,5058 | 1845 | 1 | -0,2086 | 674  | -1 | 0,4058  | 328  | -1 | 0,6144  |
| CCDC93       | 1419 | 0,2465  | 21965 | -0,0032 | 805  | 0,4538  | 1863 | 1 | 0,2073  | 1649 | -1 | -0,2497 | 613  | -1 | -0,4570 |
| COTL1        | 630  | -0,3877 | 684   | 0,1756  | 3252 | -0,1843 | 1935 | 1 | 0,2034  | 330  | -1 | 0,5634  | 945  | -1 | 0,3600  |
| PEG10        | 131  | -0,7255 | 11997 | 0,0137  | 146  | -0,9275 | 1973 | 1 | -0,2020 | 162  | -1 | 0,7392  | 92   | -1 | 0,9412  |
| ITPKB        | 357  | 0,5137  | 4204  | -0,0634 | 297  | 0,7152  | 1987 | 1 | 0,2015  | 310  | -1 | -0,5770 | 178  | -1 | -0,7786 |
| RHOU         | 20   | 1,2378  | 241   | -0,2644 | 100  | 1,0370  | 2003 | 1 | -0,2008 | 13   | -1 | -1,5022 | 31   | -1 | -1,3015 |
| BAZ2B        | 501  | 0,4349  | 2015  | -0,1054 | 2291 | 0,2364  | 2065 | 1 | -0,1985 | 366  | -1 | -0,5403 | 1028 | -1 | -0,3418 |
| CEP250       | 3197 | -0,1462 | 6185  | 0,0431  | 1276 | -0,3444 | 2071 | 1 | -0,1982 | 2598 | -1 | 0,1894  | 812  | -1 | 0,3875  |
| TOM1         | 585  | 0,4015  | 4251  | -0,0628 | 446  | 0,5979  | 2106 | 1 | 0,1964  | 520  | -1 | -0,4643 | 284  | -1 | -0,6607 |
| SLC4A7       | 359  | 0,5124  | 2843  | -0,0853 | 1450 | 0,3182  | 2165 | 1 | -0,1941 | 279  | -1 | -0,5977 | 762  | -1 | -0,4036 |
| GADD45B      | 337  | 0,5227  | 8654  | -0,0263 | 295  | 0,7166  | 2170 | 1 | 0,1939  | 355  | -1 | -0,5489 | 210  | -1 | -0,7428 |
| RP4-555D20.2 | 200  | -0,6444 | 236   | 0,2662  | 817  | -0,4510 | 2180 | 1 | 0,1934  | 77   | -1 | 0,9106  | 230  | -1 | 0,7172  |
| CACNA1I      | 485  | 0,4398  | 8969  | -0,0247 | 398  | 0,6324  | 2196 | 1 | 0,1926  | 519  | -1 | -0,4645 | 289  | -1 | -0,6570 |
| ZSWIM6       | 4569 | 0,1126  | 11180 | -0,0160 | 1559 | 0,3041  | 2223 | 1 | 0,1915  | 4365 | -1 | -0,1286 | 1130 | -1 | -0,3201 |
| CTPS1        | 994  | 0,3014  | 8146  | -0,0291 | 694  | 0,4909  | 2269 | 1 | 0,1895  | 987  | -1 | -0,3305 | 483  | -1 | -0,5200 |
| MORC4        | 448  | -0,4594 | 1900  | 0,1092  | 375  | -0,6487 | 2271 | 1 | -0,1894 | 320  | -1 | 0,5686  | 192  | -1 | 0,7579  |
| N4BP2        | 4856 | 0,1072  | 27811 | -0,0005 | 1638 | 0,2947  | 2316 | 1 | 0,1875  | 5334 | -1 | -0,1077 | 1289 | -1 | -0,2952 |
| FOXP1-IT1    | 2067 | 0,1921  | 11137 | -0,0162 | 1095 | 0,3789  | 2336 | 1 | 0,1867  | 2254 | -1 | -0,2083 | 789  | -1 | -0,3951 |
| FARP1        | 1066 | 0,2901  | 14411 | -0,0092 | 742  | 0,4741  | 2396 | 1 | 0,1840  | 1177 | -1 | -0,2992 | 554  | -1 | -0,4832 |
| SH3BP5L      | 416  | 0,4748  | 17136 | -0,0059 | 362  | 0,6574  | 2422 | 1 | 0,1826  | 476  | -1 | -0,4808 | 283  | -1 | -0,6633 |
| NPY4R        | 637  | -0,3859 | 3159  | 0,0795  | 508  | -0,5681 | 2431 | 1 | -0,1821 | 515  | -1 | 0,4654  | 299  | -1 | 0,6476  |
| FAM43A       | 1168 | 0,2743  | 1863  | -0,1102 | 6949 | 0,0921  | 2433 | 1 | -0,1821 | 748  | -1 | -0,3845 | 2205 | -1 | -0,2024 |
| DDB2         | 723  | 0,3600  | 955   | -0,1519 | 573  | 0,5417  | 2440 | 1 | 0,1817  | 411  | -1 | -0,5118 | 255  | -1 | -0,6936 |
| PLCXD2       | 116  | 0,7490  | 8791  | -0,0256 | 507  | 0,5683  | 2458 | 1 | -0,1807 | 143  | -1 | -0,7746 | 355  | -1 | -0,5938 |
| IMPA2        | 3468 | -0,1390 | 3538  | 0,0734  | 1449 | -0,3184 | 2488 | 1 | -0,1794 | 2186 | -1 | 0,2124  | 797  | -1 | 0,3917  |
| FURIN        | 256  | 0,5829  | 313   | -0,2403 | 258  | 0,7602  | 2546 | 1 | 0,1773  | 112  | -1 | -0,8232 | 72   | -1 | -1,0004 |
| KLHDC7A      | 1204 | -0,2698 | 5694  | 0,0475  | 840  | -0,4453 | 2583 | 1 | -0,1755 | 1059 | -1 | 0,3173  | 528  | -1 | 0,4928  |
| IGFL3        | 296  | 0,5515  | 13443 | -0,0104 | 1106 | 0,3765  | 2598 | 1 | -0,1750 | 334  | -1 | -0,5619 | 814  | -1 | -0,3869 |
| CYP26B1      | 669  | 0,3756  | 7932  | -0,0303 | 553  | 0,5486  | 2651 | 1 | 0,1731  | 675  | -1 | -0,4058 | 378  | -1 | -0,5789 |
| ARFGAP1      | 500  | 0,4350  | 11491 | -0,0150 | 432  | 0,6080  | 2654 | 1 | 0,1730  | 548  | -1 | -0,4500 | 319  | -1 | -0,6230 |
| PDGFB        | 51   | 0,9429  | 9440  | -0,0226 | 69   | 1,1154  | 2669 | 1 | 0,1725  | 59   | -1 | -0,9655 | 46   | -1 | -1,1380 |



|               |       |         |       |         |       |         |      |   |         |         |    |         |      |    |         |
|---------------|-------|---------|-------|---------|-------|---------|------|---|---------|---------|----|---------|------|----|---------|
| CCDC80        | 14    | 1,3311  | 660   | -0,1782 | 27    | 1,5031  | 2682 | 1 | 0,1721  | 11      | -1 | -1,5093 | 8    | -1 | -1,6814 |
| CSRN1P        | 330   | 0,5263  | 4733  | -0,0572 | 318   | 0,6959  | 2752 | 1 | 0,1696  | 299     | -1 | -0,5835 | 201  | -1 | -0,7531 |
| OCIAD2        | 808   | 0,3421  | 1092  | -0,1437 | 642   | 0,5114  | 2762 | 1 | 0,1693  | 467     | -1 | -0,4858 | 293  | -1 | -0,6551 |
| TCEAL1        | 190   | 0,6588  | 8306  | -0,0282 | 693   | 0,4909  | 2807 | 1 | -0,1679 | 202     | -1 | -0,6871 | 485  | -1 | -0,5192 |
| BIRC3         | 59    | -0,8858 | 3019  | 0,0821  | 290   | -0,7192 | 2849 | 1 | 0,1666  | 58      | -1 | 0,9679  | 165  | -1 | 0,8013  |
| RP1-27K12.4   | 3210  | 0,1459  | 18546 | -0,0048 | 1533  | 0,3062  | 3033 | 1 | 0,1603  | 3596    | -1 | -0,1507 | 1188 | -1 | -0,3110 |
| SERPINE2      | 27    | 1,1284  | 2138  | -0,1020 | 128   | 0,9682  | 3034 | 1 | -0,1602 | 24      | -1 | -1,2304 | 59   | -1 | -1,0702 |
| UBA6          | 352   | 0,5158  | 14985 | -0,0079 | 339   | 0,6752  | 3070 | 1 | 0,1593  | 391     | -1 | -0,5238 | 265  | -1 | -0,6831 |
| DHRS2         | 252   | 0,5846  | 4500  | -0,0599 | 272   | 0,7433  | 3095 | 1 | 0,1586  | 231     | -1 | -0,6445 | 163  | -1 | -0,8032 |
| SMTN          | 208   | 0,6362  | 5621  | -0,0482 | 224   | 0,7938  | 3123 | 1 | 0,1576  | 205     | -1 | -0,6844 | 138  | -1 | -0,8420 |
| UAP1          | 1242  | 0,2646  | 9424  | -0,0226 | 930   | 0,4192  | 3220 | 1 | 0,1546  | 1283    | -1 | -0,2872 | 654  | -1 | -0,4418 |
| ABHD2         | 127   | 0,7299  | 4969  | -0,0547 | 491   | 0,5754  | 3225 | 1 | -0,1544 | 136     | -1 | -0,7846 | 313  | -1 | -0,6302 |
| MYH16         | 349   | 0,5163  | 17469 | -0,0054 | 347   | 0,6686  | 3298 | 1 | 0,1523  | 397     | -1 | -0,5217 | 272  | -1 | -0,6739 |
| MYOF          | 187   | -0,6605 | 2994  | 0,0826  | 212   | -0,8115 | 3353 | 1 | -0,1511 | 158     | -1 | 0,7430  | 110  | -1 | 0,8941  |
| RFTN1         | 400   | 0,4820  | 6557  | -0,0402 | 399   | 0,6314  | 3410 | 1 | 0,1494  | 396     | -1 | -0,5222 | 276  | -1 | -0,6716 |
| RP1-60N8.1    | 10511 | 0,0429  | 27939 | -0,0003 | 3071  | 0,1919  | 3425 | 1 | 0,1490  | 10508   | -1 | -0,0432 | 2370 | -1 | -0,1922 |
| SIRPA         | 102   | 0,7692  | 9313  | -0,0231 | 155   | 0,9177  | 3451 | 1 | 0,1485  | 128     | -1 | -0,7923 | 93   | -1 | -0,9408 |
| FNDC3A        | 262   | 0,5745  | 1993  | -0,1060 | 899   | 0,4267  | 3473 | 1 | -0,1478 | 210     | -1 | -0,6805 | 462  | -1 | -0,5327 |
| LPAR5         | 491   | 0,4382  | 24926 | -0,0020 | 1681  | 0,2905  | 3476 | 1 | -0,1477 | 580     | -1 | -0,4403 | 1300 | -1 | -0,2926 |
| ACSL4         | 814   | 0,3407  | 3698  | -0,0708 | 704   | 0,4870  | 3529 | 1 | 0,1463  | 656     | -1 | -0,4115 | 421  | -1 | -0,5579 |
| RP1-86D1.5    | 5692  | 0,0935  | 14290 | -0,0093 | 2258  | 0,2388  | 3568 | 1 | 0,1453  | 5584    | -1 | -0,1028 | 1659 | -1 | -0,2482 |
| MRC2          | 84    | 0,8116  | 26469 | -0,0011 | 133   | 0,9565  | 3593 | 1 | 0,1448  | 118     | -1 | -0,8127 | 87   | -1 | -0,9576 |
| RFFL          | 6680  | -0,0796 | 10056 | 0,0200  | 2477  | -0,2236 | 3619 | 1 | -0,1440 | 5753    | -1 | 0,0996  | 1708 | -1 | 0,2436  |
| STXBP5        | 302   | 0,5489  | 7342  | -0,0341 | 994   | 0,4052  | 3637 | 1 | -0,1437 | 300     | -1 | -0,5830 | 659  | -1 | -0,4393 |
| FAT4          | 2803  | -0,1601 | 615   | 0,1836  | 17220 | -0,0173 | 3670 | 1 | 0,1427  | 918     | -1 | 0,3436  | 2227 | -1 | 0,2009  |
| MCTP1         | 1789  | -0,2118 | 1272  | 0,1339  | 8670  | -0,0691 | 3672 | 1 | 0,1427  | 906     | -1 | 0,3457  | 2188 | -1 | 0,2031  |
| RP11-154H23.3 | 2726  | 0,1632  | 9761  | -0,0212 | 1550  | 0,3053  | 3694 | 1 | 0,1421  | 2705    | -1 | -0,1843 | 1099 | -1 | -0,3264 |
| CGB5          | 7318  | 0,0720  | 22895 | -0,0023 | 2665  | 0,2124  | 3746 | 1 | 0,1404  | 7405,5  | -1 | -0,0743 | 2035 | -1 | -0,2147 |
| CHRNA9        | 214   | 0,6287  | 4292  | -0,0623 | 247   | 0,7690  | 3753 | 1 | 0,1403  | 197     | -1 | -0,6910 | 144  | -1 | -0,8314 |
| DIRC3         | 18945 | 0,0123  | 17700 | -0,0052 | 4165  | 0,1523  | 3774 | 1 | 0,1400  | 16283,5 | -1 | -0,0176 | 3097 | -1 | -0,1576 |
| CGB8          | 2369  | 0,1774  | 15677 | -0,0073 | 1459  | 0,3165  | 3801 | 1 | 0,1391  | 2695    | -1 | -0,1847 | 1107 | -1 | -0,3238 |
| TGFBR1        | 147   | 0,7109  | 472   | -0,2044 | 496   | 0,5739  | 3874 | 1 | -0,1370 | 76      | -1 | -0,9154 | 179  | -1 | -0,7784 |
| IGFBP6        | 756   | -0,3525 | 3403  | 0,0753  | 703   | -0,4872 | 3984 | 1 | -0,1346 | 614     | -1 | 0,4278  | 413  | -1 | 0,5625  |

|               |      |         |       |         |      |         |      |   |         |      |    |         |      |    |         |
|---------------|------|---------|-------|---------|------|---------|------|---|---------|------|----|---------|------|----|---------|
| SNHG14        | 3931 | 0,1266  | 8980  | -0,0246 | 1971 | 0,2608  | 4010 | 1 | 0,1341  | 3581 | -1 | -0,1513 | 1348 | -1 | -0,2854 |
| MTSS1L        | 639  | -0,3846 | 1540  | 0,1218  | 2089 | -0,2507 | 4019 | 1 | 0,1339  | 428  | -1 | 0,5064  | 880  | -1 | 0,3725  |
| SLC39A10      | 826  | 0,3389  | 1391  | -0,1285 | 2806 | 0,2052  | 4022 | 1 | -0,1338 | 509  | -1 | -0,4675 | 1063 | -1 | -0,3337 |
| PCDH1         | 436  | 0,4671  | 10386 | -0,0188 | 442  | 0,5994  | 4091 | 1 | 0,1323  | 465  | -1 | -0,4859 | 322  | -1 | -0,6182 |
| PPP1R15A      | 3807 | -0,1304 | 4756  | 0,0570  | 1961 | -0,2617 | 4137 | 1 | -0,1314 | 2647 | -1 | 0,1873  | 1139 | -1 | 0,3187  |
| ELFN2         | 942  | -0,3095 | 628   | 0,1824  | 3402 | -0,1792 | 4181 | 1 | 0,1303  | 451  | -1 | 0,4918  | 938  | -1 | 0,3615  |
| PWAR6         | 3987 | 0,1254  | 11998 | -0,0137 | 2036 | 0,2551  | 4199 | 1 | 0,1297  | 3993 | -1 | -0,1391 | 1475 | -1 | -0,2688 |
| CHD9          | 776  | 0,3471  | 475   | -0,2042 | 2573 | 0,2178  | 4221 | 1 | -0,1293 | 353  | -1 | -0,5513 | 715  | -1 | -0,4220 |
| MIR31HG       | 897  | 0,3201  | 6571  | -0,0401 | 827  | 0,4486  | 4258 | 1 | 0,1285  | 837  | -1 | -0,3602 | 542  | -1 | -0,4887 |
| PAQR5         | 185  | -0,6613 | 2373  | 0,0959  | 589  | -0,5333 | 4272 | 1 | 0,1280  | 153  | -1 | 0,7572  | 314  | -1 | 0,6292  |
| TREH          | 570  | 0,4077  | 17450 | -0,0054 | 1784 | 0,2799  | 4284 | 1 | -0,1278 | 652  | -1 | -0,4131 | 1350 | -1 | -0,2853 |
| CES2          | 3320 | -0,1432 | 20098 | 0,0036  | 1856 | -0,2710 | 4285 | 1 | -0,1278 | 3735 | -1 | 0,1468  | 1425 | -1 | 0,2745  |
| MAFG-AS1      | 8227 | -0,0621 | 5748  | 0,0470  | 3183 | -0,1874 | 4388 | 1 | -0,1254 | 5265 | -1 | 0,1091  | 1812 | -1 | 0,2345  |
| PLXND1        | 1122 | 0,2810  | 92    | -0,3820 | 3865 | 0,1618  | 4674 | 1 | -0,1192 | 221  | -1 | -0,6630 | 441  | -1 | -0,5438 |
| JHDM1D        | 775  | 0,3471  | 3716  | -0,0706 | 759  | 0,4662  | 4678 | 1 | 0,1191  | 638  | -1 | -0,4177 | 450  | -1 | -0,5368 |
| SRC           | 739  | -0,3566 | 2358  | 0,0963  | 2267 | -0,2380 | 4710 | 1 | 0,1186  | 543  | -1 | 0,4529  | 1062 | -1 | 0,3343  |
| RP11-383H13.1 | 4277 | 0,1189  | 14748 | -0,0083 | 2283 | 0,2372  | 4729 | 1 | 0,1183  | 4428 | -1 | -0,1272 | 1679 | -1 | -0,2455 |
| BHLHE40       | 427  | 0,4706  | 72    | -0,4118 | 1223 | 0,3535  | 4799 | 1 | -0,1170 | 85   | -1 | -0,8824 | 186  | -1 | -0,7654 |
| SQSTM1        | 1304 | -0,2575 | 7111  | 0,0357  | 1125 | -0,3732 | 4869 | 1 | -0,1157 | 1223 | -1 | 0,2932  | 751  | -1 | 0,4089  |
| MPV17L        | 977  | -0,3039 | 10235 | 0,0194  | 931  | -0,4190 | 4896 | 1 | -0,1151 | 1025 | -1 | 0,3233  | 663  | -1 | 0,4384  |
| TRIM16        | 540  | -0,4173 | 8497  | 0,0271  | 1567 | -0,3029 | 4928 | 1 | 0,1144  | 563  | -1 | 0,4444  | 1086 | -1 | 0,3300  |
| LINC00473     | 2339 | -0,1786 | 2786  | 0,0862  | 8976 | -0,0652 | 4976 | 1 | 0,1135  | 1498 | -1 | 0,2648  | 3286 | -1 | 0,1513  |
| CGB7          | 950  | 0,3076  | 25764 | -0,0014 | 924  | 0,4195  | 5062 | 1 | 0,1119  | 1121 | -1 | -0,3091 | 719  | -1 | -0,4210 |
| MEG8          | 297  | 0,5506  | 6107  | -0,0438 | 849  | 0,4419  | 5243 | 1 | -0,1087 | 284  | -1 | -0,5944 | 551  | -1 | -0,4858 |
| GAL           | 153  | 0,7006  | 6112  | -0,0438 | 218  | 0,8055  | 5440 | 1 | 0,1049  | 156  | -1 | -0,7444 | 133  | -1 | -0,8493 |
| DOCK4-AS1     | 1561 | 0,2316  | 9302  | -0,0231 | 1338 | 0,3337  | 5602 | 1 | 0,1021  | 1598 | -1 | -0,2547 | 958  | -1 | -0,3568 |
| ZNF185        | 29   | 1,1076  | 848   | -0,1608 | 112  | 1,0062  | 5642 | 1 | -0,1015 | 23   | -1 | -1,2684 | 41   | -1 | -1,1670 |
| WSCD1         | 5155 | 0,1019  | 2072  | -0,1040 | 2834 | 0,2031  | 5655 | 1 | 0,1012  | 2289 | -1 | -0,2059 | 1211 | -1 | -0,3072 |
| PRR5L         | 326  | 0,5294  | 6890  | -0,0375 | 897  | 0,4291  | 5712 | 1 | -0,1003 | 324  | -1 | -0,5669 | 582  | -1 | -0,4666 |
| AC003080.4    | 8442 | 0,0595  | 22175 | -0,0028 | 3938 | 0,1595  | 5733 | 1 | 0,1000  | 8446 | -1 | -0,0624 | 2985 | -1 | -0,1623 |
| LINC00312     | 5073 | 0,1031  | 11494 | -0,0150 | 2837 | 0,2030  | 5736 | 1 | 0,1000  | 4830 | -1 | -0,1181 | 2004 | -1 | -0,2180 |
| BMPER         | 1681 | -0,2197 | 1218  | 0,1371  | 5363 | -0,1210 | 5818 | 1 | 0,0986  | 855  | -1 | 0,3568  | 1570 | -1 | 0,2581  |
| KANK4         | 145  | 0,7115  | 8999  | -0,0245 | 214  | 0,8095  | 5853 | 1 | 0,0981  | 166  | -1 | -0,7360 | 142  | -1 | -0,8340 |

|              |       |         |       |         |      |         |      |   |         |        |    |         |      |    |         |
|--------------|-------|---------|-------|---------|------|---------|------|---|---------|--------|----|---------|------|----|---------|
| MBOAT2       | 62    | 0,8730  | 7795  | -0,0311 | 125  | 0,9706  | 5888 | 1 | 0,0976  | 79     | -1 | -0,9041 | 71   | -1 | -1,0017 |
| PLXNA4       | 314   | 0,5418  | 17007 | -0,0062 | 388  | 0,6389  | 5921 | 1 | 0,0971  | 357    | -1 | -0,5479 | 303  | -1 | -0,6450 |
| DUSP5        | 2583  | -0,1686 | 7270  | 0,0346  | 8312 | -0,0729 | 6008 | 1 | 0,0957  | 2342   | -1 | 0,2032  | 5025 | -1 | 0,1075  |
| GPR64        | 3726  | -0,1323 | 17377 | 0,0055  | 2411 | -0,2273 | 6053 | 1 | -0,0950 | 4037   | -1 | 0,1378  | 1835 | -1 | 0,2328  |
| MFAP3L       | 160   | 0,6908  | 1017  | -0,1478 | 451  | 0,5964  | 6094 | 1 | -0,0944 | 105    | -1 | -0,8387 | 209  | -1 | -0,7443 |
| RIPK4        | 1695  | -0,2187 | 3336  | 0,0763  | 1488 | -0,3121 | 6160 | 1 | -0,0934 | 1209   | -1 | 0,2950  | 808  | -1 | 0,3885  |
| AIFM2        | 3423  | -0,1403 | 8089  | 0,0294  | 2347 | -0,2325 | 6226 | 1 | -0,0922 | 3068   | -1 | 0,1697  | 1536 | -1 | 0,2619  |
| ADAMTS15     | 512   | 0,4272  | 5132  | -0,0529 | 1324 | 0,3351  | 6231 | 1 | -0,0921 | 479    | -1 | -0,4801 | 811  | -1 | -0,3879 |
| DRAP1        | 2724  | -0,1632 | 5769  | 0,0468  | 2033 | -0,2551 | 6250 | 1 | -0,0919 | 2227   | -1 | 0,2100  | 1242 | -1 | 0,3019  |
| PYGB         | 682   | -0,3724 | 7335  | 0,0342  | 1776 | -0,2810 | 6288 | 1 | 0,0914  | 671    | -1 | 0,4065  | 1154 | -1 | 0,3151  |
| ACSS1        | 842   | -0,3341 | 1033  | 0,1466  | 2201 | -0,2427 | 6290 | 1 | 0,0914  | 477    | -1 | 0,4807  | 805  | -1 | 0,3893  |
| DIXDC1       | 171   | 0,6804  | 2145  | -0,1017 | 246  | 0,7715  | 6306 | 1 | 0,0911  | 137    | -1 | -0,7821 | 120  | -1 | -0,8732 |
| GSE1         | 261   | -0,5751 | 964   | 0,1515  | 713  | -0,4843 | 6314 | 1 | 0,0909  | 174    | -1 | 0,7267  | 308  | -1 | 0,6358  |
| PLEKHG4      | 697   | -0,3659 | 1459  | 0,1255  | 802  | -0,4543 | 6513 | 1 | -0,0884 | 452    | -1 | 0,4914  | 376  | -1 | 0,5798  |
| CTC-340I23.2 | 9344  | 0,0514  | 14336 | -0,0092 | 4587 | 0,1398  | 6517 | 1 | 0,0884  | 8598,5 | -1 | -0,0606 | 3342 | -1 | -0,1490 |
| IGSF9        | 2512  | 0,1713  | 8901  | -0,0251 | 1991 | 0,2586  | 6597 | 1 | 0,0873  | 2455   | -1 | -0,1964 | 1367 | -1 | -0,2837 |
| SMAD6        | 741   | -0,3566 | 5977  | 0,0450  | 1874 | -0,2697 | 6624 | 1 | 0,0869  | 691    | -1 | 0,4016  | 1159 | -1 | 0,3147  |
| MIR181A1HG   | 13335 | 0,0277  | 12663 | -0,0120 | 5673 | 0,1144  | 6645 | 1 | 0,0867  | 10975  | -1 | -0,0397 | 4114 | -1 | -0,1265 |
| OLFM2        | 454   | 0,4531  | 9303  | -0,0231 | 576  | 0,5397  | 6649 | 1 | 0,0866  | 484    | -1 | -0,4762 | 410  | -1 | -0,5628 |
| RP11-554I8.2 | 730   | -0,3587 | 10413 | 0,0187  | 841  | -0,4453 | 6656 | 1 | -0,0865 | 770    | -1 | 0,3774  | 591  | -1 | 0,4640  |
| SKIL         | 321   | 0,5330  | 449   | -0,2086 | 416  | 0,6191  | 6688 | 1 | 0,0861  | 159    | -1 | -0,7417 | 147  | -1 | -0,8277 |
| AMIGO2       | 273   | 0,5659  | 6070  | -0,0441 | 731  | 0,4802  | 6715 | 1 | -0,0857 | 268    | -1 | -0,6100 | 472  | -1 | -0,5244 |
| R3HDML       | 347   | 0,5183  | 23546 | -0,0023 | 880  | 0,4327  | 6719 | 1 | -0,0856 | 400    | -1 | -0,5206 | 672  | -1 | -0,4350 |
| ETV4         | 2741  | 0,1628  | 529   | -0,1960 | 7992 | 0,0774  | 6727 | 1 | -0,0854 | 846    | -1 | -0,3588 | 1433 | -1 | -0,2734 |
| P2RY2        | 415   | 0,4753  | 300   | -0,2447 | 1050 | 0,3901  | 6753 | 1 | -0,0852 | 180    | -1 | -0,7200 | 309  | -1 | -0,6349 |
| INSIG1       | 1069  | 0,2900  | 2868  | -0,0848 | 1120 | 0,3740  | 6846 | 1 | 0,0840  | 780    | -1 | -0,3748 | 608  | -1 | -0,4588 |
| TENC1        | 683   | -0,3723 | 1243  | 0,1353  | 1700 | -0,2888 | 6884 | 1 | 0,0835  | 424    | -1 | 0,5076  | 707  | -1 | 0,4241  |
| TP53I3       | 232   | 0,6081  | 1254  | -0,1350 | 603  | 0,5249  | 6906 | 1 | -0,0831 | 157    | -1 | -0,7430 | 286  | -1 | -0,6599 |
| LSAMP        | 1816  | 0,2093  | 9484  | -0,0224 | 1678 | 0,2909  | 7031 | 1 | 0,0816  | 1874   | -1 | -0,2316 | 1170 | -1 | -0,3133 |
| FSTL3        | 291   | 0,5546  | 13703 | -0,0101 | 395  | 0,6354  | 7099 | 1 | 0,0809  | 328    | -1 | -0,5646 | 301  | -1 | -0,6455 |
| LRR8C        | 285   | 0,5594  | 3417  | -0,0751 | 389  | 0,6382  | 7266 | 1 | 0,0788  | 235    | -1 | -0,6345 | 234  | -1 | -0,7133 |
| GABRE        | 1542  | -0,2332 | 487   | 0,2027  | 1505 | -0,3106 | 7387 | 1 | -0,0774 | 592    | -1 | 0,4359  | 496  | -1 | 0,5133  |
| SMAD3        | 63    | -0,8629 | 549   | 0,1929  | 230  | -0,7858 | 7413 | 1 | 0,0771  | 40     | -1 | 1,0558  | 79   | -1 | 0,9787  |

|               |       |         |       |         |      |         |        |   |         |        |    |         |        |    |         |
|---------------|-------|---------|-------|---------|------|---------|--------|---|---------|--------|----|---------|--------|----|---------|
| KLF13         | 990   | 0,3021  | 945   | -0,1530 | 2421 | 0,2265  | 7536   | 1 | -0,0756 | 538    | -1 | -0,4551 | 849    | -1 | -0,3795 |
| EXTL2         | 1426  | 0,2455  | 11580 | -0,0148 | 1435 | 0,3204  | 7570   | 1 | 0,0750  | 1542   | -1 | -0,2603 | 1057   | -1 | -0,3353 |
| PLIN2         | 737   | -0,3571 | 1055  | 0,1456  | 885  | -0,4318 | 7591   | 1 | -0,0747 | 433    | -1 | 0,5027  | 382    | -1 | 0,5773  |
| LOX           | 953   | 0,3072  | 6907  | -0,0373 | 2346 | 0,2326  | 7595   | 1 | -0,0746 | 913    | -1 | -0,3445 | 1465   | -1 | -0,2699 |
| CTD-2194F4.2  | 9725  | 0,0484  | 25773 | -0,0014 | 5274 | 0,1229  | 7610,5 | 1 | 0,0745  | 9716,5 | -1 | -0,0499 | 4209   | -1 | -0,1244 |
| FTL           | 601   | -0,3956 | 2967  | 0,0831  | 1423 | -0,3220 | 7690   | 1 | 0,0736  | 480    | -1 | 0,4787  | 758    | -1 | 0,4051  |
| FAM83G        | 324   | 0,5297  | 1278  | -0,1336 | 438  | 0,6016  | 7815   | 1 | 0,0719  | 220    | -1 | -0,6633 | 217    | -1 | -0,7352 |
| LAMA5         | 1333  | -0,2546 | 7385  | 0,0339  | 1412 | -0,3235 | 8060   | 1 | -0,0690 | 1271   | -1 | 0,2884  | 956    | -1 | 0,3574  |
| SERPINE1      | 8     | 1,4941  | 387   | -0,2200 | 32   | 1,4274  | 8276   | 1 | -0,0667 | 3      | -1 | -1,7141 | 9      | -1 | -1,6474 |
| CPT1A         | 1906  | -0,2026 | 460   | 0,2063  | 1879 | -0,2692 | 8291   | 1 | -0,0666 | 663    | -1 | 0,4089  | 563    | -1 | 0,4755  |
| CHRNA4        | 2566  | 0,1693  | 13844 | -0,0098 | 2324 | 0,2344  | 8401   | 1 | 0,0652  | 2829   | -1 | -0,1791 | 1697   | -1 | -0,2443 |
| NOVA2         | 999   | 0,3006  | 11963 | -0,0137 | 2282 | 0,2373  | 8565   | 1 | -0,0633 | 1079   | -1 | -0,3144 | 1627   | -1 | -0,2511 |
| RP11-74C1.2   | 9886  | 0,0474  | 25167 | -0,0020 | 5890 | 0,1099  | 8645,5 | 1 | 0,0625  | 9765   | -1 | -0,0494 | 4798,5 | -1 | -0,1119 |
| RP11-215G15.5 | 738   | -0,3567 | 2736  | 0,0872  | 1634 | -0,2951 | 8746   | 1 | 0,0616  | 568    | -1 | 0,4439  | 837    | -1 | 0,3823  |
| SCG5          | 748   | 0,3538  | 5897  | -0,0457 | 950  | 0,4150  | 8797   | 1 | 0,0613  | 698    | -1 | -0,3994 | 600    | -1 | -0,4607 |
| RP11-218E20.3 | 473   | 0,4445  | 10995 | -0,0167 | 651  | 0,5053  | 8839   | 1 | 0,0608  | 527    | -1 | -0,4612 | 476    | -1 | -0,5220 |
| P4HA3         | 34    | 1,0537  | 6290  | -0,0423 | 116  | 0,9947  | 9063   | 1 | -0,0590 | 32     | -1 | -1,0960 | 64     | -1 | -1,0370 |
| TRIM16L       | 420   | -0,4739 | 2608  | 0,0903  | 949  | -0,4151 | 9087   | 1 | 0,0587  | 329    | -1 | 0,5642  | 504    | -1 | 0,5054  |
| PKP2          | 288   | -0,5589 | 1302  | 0,1324  | 657  | -0,5011 | 9173   | 1 | 0,0577  | 196    | -1 | 0,6913  | 310    | -1 | 0,6336  |
| HMOX1         | 3441  | 0,1398  | 374   | -0,2232 | 7573 | 0,0833  | 9284   | 1 | -0,0565 | 827    | -1 | -0,3630 | 1214   | -1 | -0,3065 |
| FLOT1         | 831   | -0,3372 | 26450 | 0,0012  | 1040 | -0,3936 | 9299   | 1 | -0,0564 | 946    | -1 | 0,3384  | 792    | -1 | 0,3948  |
| SH3TC1        | 399   | -0,4821 | 6101  | 0,0439  | 901  | -0,4262 | 9348   | 1 | 0,0559  | 389    | -1 | 0,5260  | 573    | -1 | 0,4701  |
| DDC8          | 2135  | 0,1891  | 13263 | -0,0107 | 2168 | 0,2449  | 9354   | 1 | 0,0559  | 2394   | -1 | -0,1998 | 1590   | -1 | -0,2556 |
| PLXNA2        | 301   | 0,5495  | 473   | -0,2044 | 684  | 0,4938  | 9370   | 1 | -0,0557 | 154    | -1 | -0,7539 | 250    | -1 | -0,6982 |
| MAML3         | 313   | 0,5418  | 1601  | -0,1193 | 706  | 0,4862  | 9380   | 1 | -0,0556 | 223    | -1 | -0,6611 | 339    | -1 | -0,6055 |
| UNC13D        | 11193 | -0,0383 | 4453  | 0,0604  | 6866 | -0,0936 | 9413   | 1 | -0,0553 | 5809   | -1 | 0,0986  | 3197   | -1 | 0,1540  |
| PDE11A        | 258   | 0,5800  | 8023  | -0,0298 | 602  | 0,5251  | 9481   | 1 | -0,0548 | 269    | -1 | -0,6098 | 426    | -1 | -0,5549 |
| CNKS3         | 1000  | -0,2999 | 2627  | 0,0899  | 1219 | -0,3546 | 9494   | 1 | -0,0547 | 733    | -1 | 0,3898  | 650    | -1 | 0,4445  |
| CTD-2066L21.3 | 198   | 0,6485  | 6505  | -0,0406 | 452  | 0,5955  | 9683   | 1 | -0,0530 | 201    | -1 | -0,6891 | 307    | -1 | -0,6361 |
| JMJD1C        | 1137  | 0,2783  | 3449  | -0,0747 | 2419 | 0,2266  | 9871   | 1 | -0,0517 | 869    | -1 | -0,3531 | 1247   | -1 | -0,3014 |
| KLF4          | 4045  | -0,1242 | 12475 | 0,0125  | 3496 | -0,1756 | 9906   | 1 | -0,0514 | 4079   | -1 | 0,1367  | 2444   | -1 | 0,1881  |
| RP11-519G16.5 | 2305  | 0,1801  | 24160 | -0,0023 | 4999 | 0,1292  | 9964   | 1 | -0,0509 | 2756   | -1 | -0,1824 | 3929   | -1 | -0,1315 |
| VGLL3         | 55    | 0,9035  | 90    | -0,3831 | 137  | 0,9531  | 10146  | 1 | 0,0496  | 22     | -1 | -1,2867 | 27     | -1 | -1,3363 |



|               |       |         |       |         |      |         |         |   |         |         |    |         |      |    |         |
|---------------|-------|---------|-------|---------|------|---------|---------|---|---------|---------|----|---------|------|----|---------|
| KDM6B         | 37    | 1,0235  | 5637  | -0,0481 | 87   | 1,0725  | 10220   | 1 | 0,0490  | 39      | -1 | -1,0716 | 49   | -1 | -1,1206 |
| TSPAN9        | 372   | 0,5005  | 6248  | -0,0426 | 552  | 0,5487  | 10326   | 1 | 0,0482  | 361     | -1 | -0,5432 | 358  | -1 | -0,5913 |
| LMO4          | 1068  | -0,2900 | 1642  | 0,1175  | 1305 | -0,3380 | 10354   | 1 | -0,0480 | 668     | -1 | 0,4075  | 623  | -1 | 0,4555  |
| COL15A1       | 1036  | 0,2937  | 10003 | -0,0201 | 2154 | 0,2460  | 10395   | 1 | -0,0476 | 1082    | -1 | -0,3138 | 1507 | -1 | -0,2661 |
| RP11-597K23.2 | 493   | 0,4378  | 20267 | -0,0034 | 1048 | 0,3913  | 10554   | 1 | -0,0464 | 576     | -1 | -0,4412 | 790  | -1 | -0,3948 |
| PRKAB2        | 871   | 0,3269  | 11893 | -0,0139 | 1128 | 0,3725  | 10660   | 1 | 0,0456  | 928     | -1 | -0,3408 | 818  | -1 | -0,3864 |
| AP002954.3    | 1831  | 0,2082  | 25744 | -0,0014 | 3793 | 0,1643  | 10890   | 1 | -0,0439 | 2234    | -1 | -0,2096 | 2912 | -1 | -0,1657 |
| RP11-460N11.2 | 15103 | 0,0213  | 18088 | -0,0052 | 8989 | 0,0650  | 10908   | 1 | 0,0438  | 13528,5 | -1 | -0,0265 | 7493 | -1 | -0,0703 |
| SPOCK1        | 60    | 0,8819  | 11170 | -0,0160 | 151  | 0,9240  | 11153   | 1 | 0,0420  | 80      | -1 | -0,8979 | 94   | -1 | -0,9400 |
| RELL1         | 91    | 0,7969  | 7198  | -0,0350 | 262  | 0,7551  | 11198   | 1 | -0,0418 | 107     | -1 | -0,8319 | 173  | -1 | -0,7901 |
| OSGIN1        | 389   | -0,4873 | 3442  | 0,0748  | 839  | -0,4458 | 11263   | 1 | 0,0415  | 333     | -1 | 0,5621  | 480  | -1 | 0,5206  |
| MT2A          | 269   | 0,5717  | 24627 | -0,0023 | 596  | 0,5306  | 11323   | 1 | -0,0411 | 313     | -1 | -0,5740 | 461  | -1 | -0,5329 |
| TPCN1         | 868   | -0,3274 | 25338 | 0,0018  | 1709 | -0,2875 | 11479   | 1 | 0,0399  | 997     | -1 | 0,3292  | 1316 | -1 | 0,2893  |
| BCL2L1        | 453   | -0,4559 | 5145  | 0,0527  | 938  | -0,4179 | 11760   | 1 | 0,0380  | 421     | -1 | 0,5086  | 572  | -1 | 0,4706  |
| KLHL4         | 949   | -0,3082 | 220   | 0,2735  | 1857 | -0,2710 | 11897   | 1 | 0,0373  | 302     | -1 | 0,5817  | 439  | -1 | 0,5445  |
| TNFAIP2       | 57    | -0,8917 | 1948  | 0,1077  | 186  | -0,8568 | 12407   | 1 | 0,0349  | 52      | -1 | 0,9995  | 82   | -1 | 0,9645  |
| RPL9P16       | 8641  | 0,0578  | 19541 | -0,0040 | 6939 | 0,0922  | 12526,5 | 1 | 0,0345  | 8498    | -1 | -0,0618 | 5642 | -1 | -0,0963 |
| SEMA6B        | 351   | -0,5162 | 125   | 0,3494  | 547  | -0,5498 | 12711   | 1 | -0,0336 | 92      | -1 | 0,8656  | 109  | -1 | 0,8992  |
| C3            | 350   | -0,5162 | 217   | 0,2752  | 719  | -0,4836 | 12933   | 1 | 0,0325  | 130     | -1 | 0,7914  | 189  | -1 | 0,7589  |
| MYLK          | 264   | -0,5740 | 299   | 0,2449  | 433  | -0,6064 | 12956   | 1 | -0,0324 | 113     | -1 | 0,8189  | 131  | -1 | 0,8513  |
| SGCD          | 167   | 0,6853  | 253   | -0,2598 | 294  | 0,7171  | 13086   | 1 | 0,0318  | 65      | -1 | -0,9451 | 81   | -1 | -0,9769 |
| FOXQ1         | 1167  | -0,2743 | 7566  | 0,0326  | 2185 | -0,2435 | 13187   | 1 | 0,0308  | 1131    | -1 | 0,3069  | 1415 | -1 | 0,2761  |
| PAX7          | 879   | -0,3252 | 28097 | 0,0000  | 1215 | -0,3557 | 13231   | 1 | -0,0305 | 1017    | -1 | 0,3252  | 962  | -1 | 0,3557  |
| P4HA2         | 583   | 0,4033  | 3042  | -0,0817 | 881  | 0,4324  | 13506   | 1 | 0,0291  | 468     | -1 | -0,4849 | 494  | -1 | -0,5140 |
| RP11-103C16.2 | 3001  | 0,1532  | 25594 | -0,0016 | 3329 | 0,1819  | 13548   | 1 | 0,0287  | 3483    | -1 | -0,1548 | 2539 | -1 | -0,1836 |
| RP11-408N14.1 | 1588  | 0,2274  | 6054  | -0,0443 | 2020 | 0,2560  | 13556   | 1 | 0,0287  | 1425    | -1 | -0,2717 | 1256 | -1 | -0,3004 |
| ZDHHC17       | 830   | 0,3376  | 22271 | -0,0028 | 1170 | 0,3656  | 13729   | 1 | 0,0280  | 931     | -1 | -0,3404 | 907  | -1 | -0,3684 |
| CTD-2066L21.2 | 515   | 0,4263  | 13851 | -0,0098 | 803  | 0,4542  | 13741   | 1 | 0,0279  | 590     | -1 | -0,4361 | 590  | -1 | -0,4640 |
| SLC36A1       | 930   | 0,3134  | 8339  | -0,0280 | 1725 | 0,2860  | 13864   | 1 | -0,0274 | 924     | -1 | -0,3414 | 1165 | -1 | -0,3140 |
| MAPKAPK3      | 1296  | -0,2584 | 6141  | 0,0435  | 1728 | -0,2858 | 13869   | 1 | -0,0273 | 1155    | -1 | 0,3020  | 1089 | -1 | 0,3293  |
| PIK3IP1       | 441   | 0,4639  | 8994  | -0,0246 | 856  | 0,4396  | 14728   | 1 | -0,0243 | 458     | -1 | -0,4885 | 589  | -1 | -0,4642 |
| RP1-86D1.3    | 2468  | 0,1729  | 22372 | -0,0024 | 2970 | 0,1966  | 15150   | 1 | 0,0237  | 2903    | -1 | -0,1753 | 2246 | -1 | -0,1990 |
| GSR           | 948   | -0,3083 | 7980  | 0,0300  | 1360 | -0,3315 | 15397   | 1 | -0,0232 | 947     | -1 | 0,3384  | 937  | -1 | 0,3615  |

|                |      |         |       |         |      |         |         |   |         |        |    |         |        |    |         |
|----------------|------|---------|-------|---------|------|---------|---------|---|---------|--------|----|---------|--------|----|---------|
| CD59           | 434  | 0,4676  | 1000  | -0,1488 | 843  | 0,4449  | 15557   | 1 | -0,0226 | 263    | -1 | -0,6164 | 356    | -1 | -0,5937 |
| RN7SKP97       | 6422 | -0,0827 | 5954  | 0,0452  | 9376 | -0,0610 | 15646   | 1 | 0,0218  | 4393   | -1 | 0,1279  | 5097   | -1 | 0,1061  |
| CDC25B         | 411  | -0,4762 | 1978  | 0,1066  | 800  | -0,4547 | 15740   | 1 | 0,0215  | 301    | -1 | 0,5829  | 416    | -1 | 0,5614  |
| CHST3          | 335  | 0,5235  | 7611  | -0,0323 | 562  | 0,5449  | 15803   | 1 | 0,0213  | 346    | -1 | -0,5558 | 383    | -1 | -0,5772 |
| TIMP2          | 35   | 1,0426  | 15360 | -0,0078 | 89   | 1,0634  | 15937   | 1 | 0,0208  | 42     | -1 | -1,0504 | 58     | -1 | -1,0712 |
| COL1A1         | 9    | 1,4803  | 8776  | -0,0256 | 30   | 1,4605  | 16042   | 1 | -0,0198 | 12     | -1 | -1,5060 | 14     | -1 | -1,4861 |
| SGK2           | 277  | -0,5627 | 8018  | 0,0298  | 567  | -0,5440 | 16258   | 1 | 0,0187  | 285    | -1 | 0,5925  | 388    | -1 | 0,5738  |
| MBP            | 358  | -0,5131 | 10301 | 0,0192  | 594  | -0,5307 | 17067   | 1 | -0,0176 | 378    | -1 | 0,5322  | 431    | -1 | 0,5498  |
| TAPT1          | 788  | 0,3443  | 2396  | -0,0953 | 1188 | 0,3617  | 17142   | 1 | 0,0174  | 582    | -1 | -0,4396 | 614    | -1 | -0,4570 |
| TMEM88         | 3161 | 0,1478  | 25273 | -0,0020 | 4913 | 0,1313  | 17466   | 1 | -0,0165 | 3620   | -1 | -0,1498 | 3872   | -1 | -0,1333 |
| AHNAK          | 2292 | -0,1811 | 93    | 0,3800  | 3785 | -0,1647 | 17470   | 1 | 0,0164  | 336    | -1 | 0,5611  | 438    | -1 | 0,5446  |
| ANKRD33B       | 1812 | -0,2095 | 13295 | 0,0106  | 2436 | -0,2258 | 17479   | 1 | -0,0164 | 2041   | -1 | 0,2201  | 1784   | -1 | 0,2364  |
| RP11-342M21.2  | 6810 | -0,0777 | 8569  | 0,0268  | 6962 | -0,0919 | 18752,5 | 1 | -0,0142 | 5478   | -1 | 0,1045  | 4469   | -1 | 0,1186  |
| TPST1          | 494  | 0,4375  | 6039  | -0,0445 | 908  | 0,4242  | 18851   | 1 | -0,0133 | 473    | -1 | -0,4821 | 576    | -1 | -0,4687 |
| SLCO5A1        | 53   | 0,9178  | 7762  | -0,0314 | 161  | 0,9050  | 18940   | 1 | -0,0128 | 62     | -1 | -0,9492 | 95     | -1 | -0,9364 |
| CRLF1          | 31   | 1,0792  | 11747 | -0,0144 | 76   | 1,0916  | 19146   | 1 | 0,0124  | 34     | -1 | -1,0935 | 51     | -1 | -1,1059 |
| RASGRP3        | 5    | 1,6240  | 5532  | -0,0490 | 20   | 1,6351  | 20534   | 1 | 0,0111  | 6      | -1 | -1,6731 | 7      | -1 | -1,6841 |
| TBC1D2         | 163  | -0,6877 | 13647 | 0,0103  | 338  | -0,6766 | 20538   | 1 | 0,0111  | 194    | -1 | 0,6980  | 261    | -1 | 0,6870  |
| MED12L         | 1149 | 0,2765  | 9114  | -0,0239 | 1712 | 0,2872  | 20939   | 1 | 0,0107  | 1166   | -1 | -0,3005 | 1187   | -1 | -0,3111 |
| TESC           | 1636 | -0,2234 | 3712  | 0,0707  | 2653 | -0,2132 | 21090   | 1 | 0,0102  | 1216   | -1 | 0,2941  | 1363   | -1 | 0,2839  |
| JUNB           | 140  | 0,7164  | 450   | -0,2085 | 310  | 0,7065  | 21131   | 1 | -0,0099 | 73     | -1 | -0,9249 | 104    | -1 | -0,9150 |
| HIST1H2BI      | 707  | -0,3634 | 1030  | 0,1470  | 1222 | -0,3537 | 21200   | 1 | 0,0097  | 417    | -1 | 0,5104  | 512    | -1 | 0,5007  |
| TGFBI          | 28   | 1,1101  | 3381  | -0,0757 | 68   | 1,1198  | 21220   | 1 | 0,0096  | 26     | -1 | -1,1858 | 38     | -1 | -1,1954 |
| BLOC1S2        | 85   | 0,8050  | 4598  | -0,0586 | 222  | 0,7960  | 22538   | 1 | -0,0090 | 93     | -1 | -0,8636 | 130    | -1 | -0,8546 |
| PTPRK          | 71   | 0,8400  | 1906  | -0,1091 | 192  | 0,8487  | 22953   | 1 | 0,0087  | 63     | -1 | -0,9491 | 86     | -1 | -0,9578 |
| RP11-217E22.5  | 5906 | 0,0906  | 25057 | -0,0020 | 6515 | 0,0990  | 23078   | 1 | 0,0085  | 6185,5 | -1 | -0,0926 | 5369,5 | -1 | -0,1011 |
| SLAMF9         | 668  | 0,3758  | 19550 | -0,0040 | 1158 | 0,3681  | 23381   | 1 | -0,0077 | 759    | -1 | -0,3799 | 883    | -1 | -0,3722 |
| CABLES1        | 957  | -0,3068 | 1130  | 0,1417  | 1474 | -0,3144 | 23398   | 1 | -0,0076 | 550    | -1 | 0,4485  | 618    | -1 | 0,4561  |
| CREM           | 96   | 0,7847  | 6240  | -0,0427 | 239  | 0,7772  | 23425   | 1 | -0,0075 | 108    | -1 | -0,8273 | 151    | -1 | -0,8199 |
| NFATC2         | 638  | 0,3846  | 9831  | -0,0208 | 1100 | 0,3777  | 24063   | 1 | -0,0069 | 677    | -1 | -0,4054 | 775    | -1 | -0,3985 |
| RP11-54F2.1    | 4602 | -0,1119 | 11983 | 0,0137  | 6113 | -0,1058 | 24633   | 1 | 0,0061  | 4494   | -1 | 0,1256  | 4426,5 | -1 | 0,1195  |
| FLRT2          | 270  | 0,5696  | 225   | -0,2725 | 495  | 0,5744  | 25115   | 1 | 0,0048  | 103    | -1 | -0,8421 | 134    | -1 | -0,8469 |
| RP11-284F21.10 | 1164 | -0,2746 | 1982  | 0,1065  | 1867 | -0,2701 | 25169   | 1 | 0,0045  | 755    | -1 | 0,3811  | 862    | -1 | 0,3766  |

|               |       |         |       |         |      |         |       |   |         |       |    |         |      |    |         |
|---------------|-------|---------|-------|---------|------|---------|-------|---|---------|-------|----|---------|------|----|---------|
| RXRA          | 1792  | -0,2116 | 2099  | 0,1032  | 2744 | -0,2086 | 25748 | 1 | 0,0030  | 1074  | -1 | 0,3148  | 1179 | -1 | 0,3118  |
| ARHGAP26      | 354   | -0,5141 | 3006  | 0,0823  | 625  | -0,5170 | 25783 | 1 | -0,0029 | 281   | -1 | 0,5965  | 349  | -1 | 0,5994  |
| LRRC15        | 916   | 0,3171  | 17807 | -0,0052 | 1452 | 0,3181  | 28510 | 1 | 0,0010  | 1029  | -1 | -0,3223 | 1111 | -1 | -0,3233 |
| SERPINB9      | 1247  | -0,2639 | 995   | 0,1491  | 1942 | -0,2633 | 28625 | 1 | 0,0006  | 653   | -1 | 0,4130  | 739  | -1 | 0,4124  |
| MTUS1         | 417   | -0,4747 | 3     | -1,0989 | 1    | -2,2610 | 1     | 1 | -1,7863 | 250   | 1  | -0,6242 | 42   | 1  | 1,1621  |
| IGFBP5        | 142   | 0,7127  | 6218  | 0,0428  | 2    | 2,1022  | 6     | 1 | 1,3895  | 215   | 1  | -0,6699 | 1    | 1  | -2,0594 |
| TNS4          | 607   | -0,3942 | 2     | -1,1178 | 10   | -1,7362 | 7     | 1 | -1,3420 | 177   | 1  | -0,7236 | 321  | 1  | 0,6184  |
| KRT19         | 356   | -0,5138 | 8     | -0,8111 | 9    | -1,7547 | 9     | 1 | -1,2409 | 1193  | 1  | -0,2973 | 91   | 1  | 0,9436  |
| CTD-2377D24.6 | 12300 | 0,0325  | 1408  | 0,1278  | 63   | 1,1535  | 10    | 1 | 1,1210  | 6017  | 1  | 0,0953  | 66   | 1  | -1,0257 |
| ELF3          | 295   | -0,5525 | 66    | -0,4261 | 17   | -1,6702 | 11    | 1 | -1,1177 | 4456  | 1  | 0,1265  | 34   | 1  | 1,2441  |
| SLFN11        | 1699  | -0,2182 | 16    | -0,6683 | 46   | -1,2787 | 15    | 1 | -1,0606 | 547   | 1  | -0,4501 | 333  | 1  | 0,6104  |
| GPRIN3        | 3437  | -0,1398 | 20    | -0,6080 | 60   | -1,1738 | 17    | 1 | -1,0339 | 504   | 1  | -0,4682 | 404  | 1  | 0,5658  |
| IFI44L        | 8843  | 0,0559  | 3129  | 0,0801  | 91   | 1,0595  | 20    | 1 | 1,0035  | 14060 | 1  | 0,0241  | 78   | 1  | -0,9794 |
| DHRS3         | 4674  | -0,1107 | 71    | -0,4124 | 75   | -1,0989 | 21    | 1 | -0,9882 | 1158  | 1  | -0,3017 | 262  | 1  | 0,6865  |
| VCAN          | 119   | 0,7459  | 6     | 0,9608  | 16   | 1,6952  | 22    | 1 | 0,9493  | 2132  | 1  | 0,2149  | 218  | 1  | -0,7344 |
| SH2B3         | 823   | 0,3393  | 25    | 0,5569  | 51   | 1,2653  | 24    | 1 | 0,9260  | 2084  | 1  | 0,2176  | 241  | 1  | -0,7084 |
| LAMA3         | 4163  | -0,1215 | 639   | -0,1814 | 98   | -1,0406 | 25    | 1 | -0,9192 | 8656  | 1  | -0,0600 | 126  | 1  | 0,8592  |
| EPHA5         | 4366  | 0,1169  | 132   | 0,3358  | 106  | 1,0245  | 27    | 1 | 0,9075  | 2062  | 1  | 0,2189  | 258  | 1  | -0,6886 |
| CXCL1         | 4939  | 0,1056  | 18    | 0,6348  | 114  | 1,0011  | 28    | 1 | 0,8955  | 382   | 1  | 0,5292  | 914  | 1  | -0,3663 |
| POF1B         | 9562  | -0,0497 | 94    | -0,3798 | 191  | -0,8494 | 46    | 1 | -0,7997 | 991   | 1  | -0,3300 | 575  | 1  | 0,4696  |
| ANTXR2        | 6571  | 0,0811  | 1375  | 0,1293  | 183  | 0,8620  | 49    | 1 | 0,7809  | 9914  | 1  | 0,0482  | 219  | 1  | -0,7327 |
| AKR1C2        | 54    | -0,9153 | 67    | -0,4240 | 14   | -1,6960 | 50    | 1 | -0,7807 | 454   | 1  | 0,4913  | 33   | 1  | 1,2720  |
| SPINT2        | 2124  | -0,1895 | 17    | -0,6588 | 130  | -0,9614 | 54    | 1 | -0,7718 | 497   | 1  | -0,4693 | 1237 | 1  | 0,3026  |
| BCAT1         | 2224  | 0,1844  | 62    | 0,4439  | 135  | 0,9544  | 57    | 1 | 0,7699  | 1546  | 1  | 0,2595  | 497  | 1  | -0,5104 |
| DNER          | 13850 | 0,0259  | 609   | 0,1837  | 231  | 0,7858  | 58    | 1 | 0,7598  | 3395  | 1  | 0,1578  | 344  | 1  | -0,6020 |
| CFH           | 2450  | -0,1733 | 134   | -0,3353 | 149  | -0,9250 | 59    | 1 | -0,7516 | 3268  | 1  | -0,1619 | 360  | 1  | 0,5897  |
| SLC4A4        | 828   | 0,3381  | 260   | 0,2575  | 78   | 1,0896  | 60    | 1 | 0,7515  | 6942  | 1  | -0,0806 | 143  | 1  | -0,8321 |
| HS3ST3B1      | 787   | 0,3444  | 2478  | 0,0934  | 80   | 1,0857  | 62    | 1 | 0,7413  | 1639  | 1  | -0,2510 | 75   | 1  | -0,9922 |
| MCAM          | 6320  | 0,0843  | 49    | 0,4670  | 205  | 0,8246  | 63    | 1 | 0,7403  | 751   | 1  | 0,3827  | 954  | 1  | -0,3576 |
| PTGS2         | 597   | -0,3968 | 23    | -0,5675 | 70   | -1,1147 | 67    | 1 | -0,7179 | 3036  | 1  | -0,1707 | 433  | 1  | 0,5472  |
| LLGL2         | 710   | -0,3623 | 51    | -0,4644 | 85   | -1,0757 | 69    | 1 | -0,7134 | 5627  | 1  | -0,1021 | 332  | 1  | 0,6113  |
| GPX2          | 41    | -0,9933 | 7     | -0,8948 | 12   | -1,7066 | 70    | 1 | -0,7133 | 5818  | 1  | 0,0985  | 159  | 1  | 0,8118  |
| EPS8          | 9234  | -0,0524 | 205   | -0,2803 | 261  | -0,7551 | 75    | 1 | -0,7027 | 1929  | 1  | -0,2278 | 564  | 1  | 0,4749  |

|               |       |         |       |         |       |         |     |   |         |       |   |         |       |   |         |
|---------------|-------|---------|-------|---------|-------|---------|-----|---|---------|-------|---|---------|-------|---|---------|
| AGR2          | 17    | -1,2625 | 1     | -1,2256 | 6     | -1,9427 | 82  | 1 | -0,6801 | 11407 | 1 | 0,0369  | 231   | 1 | 0,7170  |
| SCARNA6       | 144   | 0,7119  | 7901  | 0,0305  | 11898 | 0,0395  | 83  | 1 | -0,6725 | 209   | 1 | -0,6815 | 21324 | 1 | -0,0090 |
| IL6           | 11099 | 0,0388  | 3293  | 0,0770  | 302   | 0,7096  | 84  | 1 | 0,6708  | 11215 | 1 | 0,0382  | 311   | 1 | -0,6326 |
| FSTL1         | 226   | 0,6159  | 97    | 0,3772  | 45    | 1,2814  | 89  | 1 | 0,6655  | 1783  | 1 | -0,2387 | 107   | 1 | -0,9042 |
| PDK4          | 720   | -0,3604 | 68    | -0,4151 | 105   | -1,0253 | 90  | 1 | -0,6649 | 9160  | 1 | -0,0547 | 335   | 1 | 0,6103  |
| TBC1D8        | 504   | -0,4319 | 166   | -0,3093 | 77    | -1,0903 | 93  | 1 | -0,6584 | 4624  | 1 | 0,1226  | 177   | 1 | 0,7811  |
| SLC27A2       | 184   | -0,6632 | 79    | -0,3970 | 42    | -1,3151 | 96  | 1 | -0,6519 | 1480  | 1 | 0,2662  | 101   | 1 | 0,9181  |
| RP11-184M15.1 | 4407  | 0,1163  | 7944  | 0,0302  | 256   | 0,7607  | 99  | 1 | 0,6444  | 6600  | 1 | -0,0861 | 221   | 1 | -0,7305 |
| PLA2G4A       | 1893  | -0,2035 | 19    | -0,6279 | 195   | -0,8457 | 101 | 1 | -0,6422 | 622   | 1 | -0,4244 | 2007  | 1 | 0,2178  |
| ADAMTS9       | 509   | 0,4299  | 1403  | 0,1279  | 92    | 1,0588  | 108 | 1 | 0,6289  | 1153  | 1 | -0,3020 | 96    | 1 | -0,9309 |
| TNFSF9        | 3869  | -0,1284 | 148   | -0,3222 | 269   | -0,7470 | 117 | 1 | -0,6186 | 2517  | 1 | -0,1938 | 700   | 1 | 0,4248  |
| SREBF1        | 11138 | -0,0386 | 103   | -0,3728 | 365   | -0,6548 | 118 | 1 | -0,6161 | 969   | 1 | -0,3341 | 1380  | 1 | 0,2820  |
| S1PR5         | 309   | 0,5454  | 7421  | 0,0336  | 62    | 1,1609  | 119 | 1 | 0,6155  | 412   | 1 | -0,5117 | 48    | 1 | -1,1273 |
| ADAMTS12      | 5977  | -0,0896 | 180   | -0,2999 | 313   | -0,7011 | 121 | 1 | -0,6115 | 2221  | 1 | -0,2103 | 770   | 1 | 0,4012  |
| PBX3          | 938   | 0,3110  | 1325  | 0,1312  | 153   | 0,9221  | 122 | 1 | 0,6111  | 2812  | 1 | -0,1798 | 172   | 1 | -0,7909 |
| SHROOM3       | 438   | -0,4663 | 140   | -0,3332 | 86    | -1,0757 | 124 | 1 | -0,6094 | 4205  | 1 | 0,1331  | 212   | 1 | 0,7425  |
| HIST1H3I      | 11132 | -0,0387 | 42    | -0,4830 | 392   | -0,6370 | 128 | 1 | -0,5983 | 564   | 1 | -0,4443 | 3195  | 1 | 0,1540  |
| PCLO          | 10470 | -0,0432 | 173   | -0,3043 | 391   | -0,6373 | 129 | 1 | -0,5940 | 1530  | 1 | -0,2611 | 1066  | 1 | 0,3330  |
| IL18          | 1343  | -0,2536 | 844   | -0,1609 | 194   | -0,8469 | 130 | 1 | -0,5934 | 6187  | 1 | 0,0926  | 263   | 1 | 0,6860  |
| GALNT9        | 11061 | 0,0390  | 2005  | 0,1056  | 400   | 0,6299  | 132 | 1 | 0,5909  | 8063  | 1 | 0,0666  | 473   | 1 | -0,5243 |
| SHC3          | 4079  | 0,1236  | 1412  | 0,1277  | 299   | 0,7117  | 135 | 1 | 0,5881  | 25880 | 1 | 0,0041  | 367   | 1 | -0,5840 |
| CD70          | 4292  | -0,1186 | 117   | -0,3545 | 311   | -0,7062 | 136 | 1 | -0,5876 | 1811  | 1 | -0,2359 | 976   | 1 | 0,3517  |
| NRIP3         | 1215  | 0,2680  | 5832  | 0,0463  | 189   | 0,8531  | 137 | 1 | 0,5851  | 2017  | 1 | -0,2217 | 162   | 1 | -0,8068 |
| ALDH3A1       | 36    | -1,0388 | 89    | -0,3835 | 21    | -1,6216 | 139 | 1 | -0,5829 | 225   | 1 | 0,6553  | 36    | 1 | 1,2382  |
| AC006262.5    | 4153  | -0,1218 | 34    | -0,5006 | 319   | -0,6952 | 143 | 1 | -0,5735 | 764   | 1 | -0,3789 | 2324  | 1 | 0,1946  |
| NKX3-1        | 753   | 0,3526  | 2328  | 0,0971  | 156   | 0,9161  | 150 | 1 | 0,5635  | 1593  | 1 | -0,2555 | 152   | 1 | -0,8190 |
| CORO2B        | 79    | 0,8158  | 7334  | 0,0342  | 37    | 1,3770  | 152 | 1 | 0,5612  | 138   | 1 | -0,7816 | 26    | 1 | -1,3428 |
| SYT12         | 14452 | -0,0229 | 11440 | -0,0152 | 483   | -0,5797 | 154 | 1 | -0,5568 | 22071 | 1 | 0,0077  | 406   | 1 | 0,5646  |
| KRT8          | 1680  | -0,2197 | 41    | -0,4846 | 241   | -0,7762 | 155 | 1 | -0,5565 | 1496  | 1 | -0,2649 | 1307  | 1 | 0,2916  |
| CNN2          | 5829  | 0,0916  | 36    | 0,4917  | 378   | 0,6433  | 157 | 1 | 0,5517  | 695   | 1 | 0,4001  | 3274  | 1 | -0,1516 |
| TRIM8         | 2094  | 0,1910  | 293   | 0,2461  | 274   | 0,7412  | 158 | 1 | 0,5502  | 9118  | 1 | 0,0551  | 523   | 1 | -0,4951 |
| LRRK2         | 4955  | -0,1054 | 169   | -0,3084 | 364   | -0,6550 | 160 | 1 | -0,5496 | 2344  | 1 | -0,2030 | 1001  | 1 | 0,3466  |
| ZNF724P       | 14536 | 0,0226  | 219   | 0,2736  | 500   | 0,5716  | 161 | 1 | 0,5490  | 1641  | 1 | 0,2509  | 1271  | 1 | -0,2981 |



|               |       |         |       |         |     |         |     |   |         |         |   |         |      |   |         |
|---------------|-------|---------|-------|---------|-----|---------|-----|---|---------|---------|---|---------|------|---|---------|
| GPRC5C        | 796   | -0,3437 | 3718  | -0,0706 | 169 | -0,8892 | 163 | 1 | -0,5455 | 1413    | 1 | 0,2731  | 154  | 1 | 0,8186  |
| COL27A1       | 398   | 0,4823  | 1954  | 0,1076  | 104 | 1,0271  | 166 | 1 | 0,5447  | 781     | 1 | -0,3748 | 99   | 1 | -0,9195 |
| NLRC5         | 7891  | 0,0654  | 491   | 0,2017  | 429 | 0,6097  | 167 | 1 | 0,5442  | 4089    | 1 | 0,1362  | 754  | 1 | -0,4080 |
| TPD52L1       | 883   | -0,3245 | 182   | -0,2992 | 180 | -0,8685 | 168 | 1 | -0,5440 | 13830   | 1 | 0,0253  | 399  | 1 | 0,5693  |
| KIRREL3       | 881   | 0,3246  | 418   | 0,2145  | 181 | 0,8676  | 169 | 1 | 0,5430  | 5212    | 1 | -0,1101 | 295  | 1 | -0,6531 |
| DYSF          | 49    | 0,9546  | 9779  | 0,0211  | 958 | 0,4136  | 170 | 1 | -0,5410 | 67      | 1 | -0,9335 | 795  | 1 | -0,3925 |
| SLFN13        | 4637  | -0,1113 | 249   | -0,2609 | 373 | -0,6499 | 172 | 1 | -0,5386 | 3628    | 1 | -0,1496 | 806  | 1 | 0,3890  |
| FGF5          | 18950 | 0,0123  | 13169 | 0,0109  | 557 | 0,5470  | 173 | 1 | 0,5347  | 28656,5 | 1 | -0,0014 | 454  | 1 | -0,5361 |
| TAGLN         | 24    | 1,1659  | 167   | 0,3092  | 13  | 1,6976  | 174 | 1 | 0,5317  | 98      | 1 | -0,8567 | 20   | 1 | -1,3884 |
| KRT18         | 968   | -0,3051 | 110   | -0,3698 | 197 | -0,8364 | 175 | 1 | -0,5313 | 8224    | 1 | -0,0647 | 583  | 1 | 0,4666  |
| MYO15B        | 1445  | -0,2435 | 500   | -0,2000 | 245 | -0,7728 | 179 | 1 | -0,5293 | 10470   | 1 | 0,0435  | 391  | 1 | 0,5728  |
| SORCS2        | 205   | 0,6382  | 1083  | 0,1441  | 61  | 1,1658  | 180 | 1 | 0,5276  | 446     | 1 | -0,4941 | 67   | 1 | -1,0217 |
| TSPAN2        | 56    | 0,9004  | 6793  | 0,0382  | 33  | 1,4260  | 181 | 1 | 0,5256  | 94      | 1 | -0,8622 | 21   | 1 | -1,3877 |
| PTPN14        | 9823  | 0,0478  | 76    | 0,4073  | 505 | 0,5696  | 184 | 1 | 0,5219  | 841     | 1 | 0,3596  | 2986 | 1 | -0,1623 |
| LTBP4         | 126   | 0,7311  | 242   | 0,2642  | 55  | 1,2528  | 185 | 1 | 0,5217  | 512     | 1 | -0,4668 | 76   | 1 | -0,9886 |
| RASGRP1       | 589   | 0,4006  | 3001  | 0,0824  | 152 | 0,9221  | 186 | 1 | 0,5215  | 1052    | 1 | -0,3182 | 140  | 1 | -0,8397 |
| TNS3          | 221   | -0,6224 | 1711  | -0,1152 | 64  | -1,1438 | 187 | 1 | -0,5215 | 426     | 1 | 0,5072  | 65   | 1 | 1,0287  |
| PDCD1LG2      | 2873  | 0,1571  | 692   | 0,1751  | 343 | 0,6727  | 189 | 1 | 0,5156  | 16124   | 1 | 0,0180  | 519  | 1 | -0,4977 |
| PLCB4         | 419   | 0,4739  | 1356  | 0,1301  | 119 | 0,9867  | 191 | 1 | 0,5128  | 917     | 1 | -0,3438 | 128  | 1 | -0,8566 |
| LGSN          | 11449 | -0,0370 | 1072  | -0,1446 | 554 | -0,5484 | 192 | 1 | -0,5114 | 5332    | 1 | -0,1077 | 761  | 1 | 0,4037  |
| RP11-166D19.1 | 1911  | 0,2021  | 420   | 0,2143  | 298 | 0,7119  | 194 | 1 | 0,5098  | 18637   | 1 | 0,0122  | 520  | 1 | -0,4976 |
| GALNT10       | 11381 | 0,0376  | 912   | 0,1555  | 560 | 0,5465  | 195 | 1 | 0,5089  | 4833    | 1 | 0,1180  | 801  | 1 | -0,3909 |
| KIAA1024      | 887   | 0,3230  | 12510 | 0,0125  | 200 | 0,8312  | 196 | 1 | 0,5082  | 1109    | 1 | -0,3106 | 153  | 1 | -0,8187 |
| DAPK1         | 114   | -0,7496 | 178   | -0,3027 | 53  | -1,2568 | 198 | 1 | -0,5072 | 556     | 1 | 0,4469  | 89   | 1 | 0,9541  |
| PCYT2         | 5862  | -0,0912 | 102   | -0,3728 | 445 | -0,5982 | 199 | 1 | -0,5070 | 1333    | 1 | -0,2816 | 1915 | 1 | 0,2254  |
| CHRNA3        | 1288  | 0,2591  | 28055 | 0,0001  | 248 | 0,7657  | 201 | 1 | 0,5066  | 1551    | 1 | -0,2589 | 185  | 1 | -0,7656 |
| CYP2S1        | 743   | -0,3555 | 1086  | -0,1441 | 184 | -0,8619 | 202 | 1 | -0,5064 | 2201    | 1 | 0,2115  | 229  | 1 | 0,7179  |
| ZYX           | 576   | 0,4055  | 109   | 0,3707  | 159 | 0,9075  | 203 | 1 | 0,5019  | 11792   | 1 | -0,0348 | 451  | 1 | -0,5367 |
| ST3GAL1       | 866   | 0,3276  | 7194  | 0,0351  | 203 | 0,8283  | 204 | 1 | 0,5007  | 1229    | 1 | -0,2925 | 170  | 1 | -0,7932 |
| FMNL3         | 1572  | 0,2305  | 1216  | 0,1372  | 281 | 0,7286  | 207 | 1 | 0,4981  | 6146    | 1 | -0,0933 | 357  | 1 | -0,5914 |
| LPXN          | 28267 | 0,0002  | 6712  | 0,0390  | 677 | 0,4958  | 210 | 1 | 0,4956  | 11141   | 1 | 0,0388  | 617  | 1 | -0,4568 |
| ITPRIP        | 449   | 0,4591  | 1831  | 0,1110  | 138 | 0,9505  | 215 | 1 | 0,4914  | 896     | 1 | -0,3481 | 141  | 1 | -0,8395 |
| MAP7D2        | 1383  | -0,2494 | 162   | -0,3138 | 275 | -0,7398 | 216 | 1 | -0,4904 | 8244    | 1 | -0,0644 | 697  | 1 | 0,4260  |

|          |       |         |       |         |     |         |     |   |         |       |   |         |      |   |         |
|----------|-------|---------|-------|---------|-----|---------|-----|---|---------|-------|---|---------|------|---|---------|
| AKR1C3   | 257   | -0,5821 | 308   | -0,2418 | 88  | -1,0698 | 219 | 1 | -0,4876 | 932   | 1 | 0,3403  | 146  | 1 | 0,8280  |
| KCNS3    | 5798  | -0,0921 | 149   | -0,3209 | 492 | -0,5754 | 222 | 1 | -0,4834 | 1914  | 1 | -0,2289 | 1597 | 1 | 0,2545  |
| ARSE     | 4494  | -0,1144 | 1385  | -0,1289 | 449 | -0,5973 | 223 | 1 | -0,4829 | 17401 | 1 | -0,0145 | 577  | 1 | 0,4684  |
| KIAA1644 | 10122 | 0,0456  | 218   | 0,2750  | 601 | 0,5268  | 229 | 1 | 0,4811  | 1904  | 1 | 0,2294  | 1618 | 1 | -0,2518 |
| GPRC5A   | 856   | -0,3304 | 37    | -0,4908 | 213 | -0,8104 | 231 | 1 | -0,4800 | 3315  | 1 | -0,1605 | 1136 | 1 | 0,3196  |
| F3       | 1154  | 0,2761  | 3024  | 0,0820  | 265 | 0,7533  | 236 | 1 | 0,4771  | 2507  | 1 | -0,1941 | 277  | 1 | -0,6713 |
| DMKN     | 1397  | -0,2484 | 281   | -0,2505 | 287 | -0,7232 | 238 | 1 | -0,4748 | 28479 | 1 | -0,0021 | 569  | 1 | 0,4727  |
| SYT13    | 44    | 0,9863  | 60    | 0,4478  | 31  | 1,4595  | 240 | 1 | 0,4732  | 371   | 1 | -0,5385 | 69   | 1 | -1,0117 |
| GNPNAT1  | 1689  | 0,2192  | 3470  | 0,0744  | 323 | 0,6916  | 242 | 1 | 0,4724  | 3799  | 1 | -0,1448 | 323  | 1 | -0,6172 |
| NTN4     | 225   | -0,6176 | 712   | -0,1730 | 79  | -1,0880 | 244 | 1 | -0,4704 | 562   | 1 | 0,4446  | 105  | 1 | 0,9150  |
| ABLIM1   | 506   | -0,4310 | 584   | -0,1875 | 162 | -0,8995 | 247 | 1 | -0,4684 | 1722  | 1 | 0,2436  | 237  | 1 | 0,7120  |
| ANXA4    | 2260  | -0,1824 | 484   | -0,2032 | 371 | -0,6503 | 248 | 1 | -0,4679 | 15032 | 1 | -0,0207 | 640  | 1 | 0,4471  |
| RASA3    | 3253  | 0,1449  | 758   | 0,1677  | 424 | 0,6117  | 249 | 1 | 0,4668  | 14416 | 1 | 0,0228  | 651  | 1 | -0,4440 |
| ARHGAP29 | 294   | -0,5527 | 354   | -0,2273 | 110 | -1,0145 | 254 | 1 | -0,4617 | 1016  | 1 | 0,3254  | 175  | 1 | 0,7872  |
| BVES     | 364   | 0,5094  | 607   | 0,1839  | 124 | 0,9711  | 255 | 1 | 0,4617  | 1015  | 1 | -0,3255 | 174  | 1 | -0,7872 |
| KIF26B   | 1073  | 0,2895  | 22083 | 0,0030  | 267 | 0,7509  | 256 | 1 | 0,4614  | 1289  | 1 | -0,2866 | 203  | 1 | -0,7480 |
| VASN     | 505   | 0,4316  | 26582 | 0,0009  | 166 | 0,8930  | 257 | 1 | 0,4613  | 605   | 1 | -0,4307 | 111  | 1 | -0,8921 |
| ST3GAL5  | 346   | -0,5185 | 481   | -0,2036 | 121 | -0,9781 | 258 | 1 | -0,4596 | 1073  | 1 | 0,3149  | 182  | 1 | 0,7745  |
| GLRX     | 2819  | -0,1594 | 482   | -0,2034 | 417 | -0,6190 | 259 | 1 | -0,4596 | 10422 | 1 | -0,0440 | 728  | 1 | 0,4156  |
| ATP1B1   | 12837 | -0,0294 | 478   | -0,2038 | 699 | -0,4885 | 260 | 1 | -0,4590 | 2928  | 1 | -0,1744 | 1354 | 1 | 0,2847  |
| DCDC2    | 521   | -0,4245 | 86    | -0,3889 | 173 | -0,8829 | 261 | 1 | -0,4584 | 11634 | 1 | 0,0356  | 525  | 1 | 0,4940  |
| MITF     | 322   | -0,5305 | 547   | -0,1930 | 118 | -0,9868 | 262 | 1 | -0,4564 | 951   | 1 | 0,3375  | 167  | 1 | 0,7939  |
| ARHGAP31 | 199   | 0,6468  | 365   | 0,2244  | 73  | 1,1010  | 265 | 1 | 0,4542  | 628   | 1 | -0,4224 | 118  | 1 | -0,8766 |
| SSFA2    | 15002 | -0,0216 | 136   | -0,3343 | 740 | -0,4744 | 268 | 1 | -0,4528 | 1091  | 1 | -0,3128 | 3626 | 1 | 0,1401  |
| TOB1     | 215   | -0,6279 | 80    | -0,3961 | 83  | -1,0784 | 272 | 1 | -0,4505 | 1870  | 1 | 0,2318  | 267  | 1 | 0,6822  |
| MYOM3    | 251   | 0,5850  | 192   | 0,2919  | 103 | 1,0289  | 279 | 1 | 0,4438  | 1222  | 1 | -0,2932 | 216  | 1 | -0,7370 |
| ABCA3    | 4460  | 0,1153  | 141   | 0,3292  | 520 | 0,5591  | 280 | 1 | 0,4438  | 2153  | 1 | 0,2139  | 1869 | 1 | -0,2299 |
| CYR61    | 850   | 0,3323  | 154   | 0,3188  | 243 | 0,7756  | 282 | 1 | 0,4433  | 17869 | 1 | -0,0135 | 616  | 1 | -0,4568 |
| SLC16A3  | 1145  | 0,2768  | 172   | 0,3052  | 293 | 0,7173  | 287 | 1 | 0,4405  | 13027 | 1 | 0,0283  | 741  | 1 | -0,4121 |
| JUN      | 804   | 0,3428  | 808   | 0,1636  | 237 | 0,7804  | 289 | 1 | 0,4375  | 2824  | 1 | -0,1792 | 324  | 1 | -0,6168 |
| ARNTL2   | 2886  | 0,1567  | 278   | 0,2516  | 458 | 0,5937  | 290 | 1 | 0,4370  | 6033  | 1 | 0,0950  | 1026 | 1 | -0,3420 |
| POPDC3   | 2122  | 0,1896  | 1442  | 0,1265  | 405 | 0,6266  | 291 | 1 | 0,4369  | 8361  | 1 | -0,0632 | 514  | 1 | -0,5001 |
| FAM46A   | 2862  | -0,1575 | 515   | -0,1978 | 457 | -0,5942 | 292 | 1 | -0,4366 | 10884 | 1 | -0,0403 | 786  | 1 | 0,3963  |

|          |       |         |       |         |     |         |     |   |         |        |   |         |       |   |         |
|----------|-------|---------|-------|---------|-----|---------|-----|---|---------|--------|---|---------|-------|---|---------|
| LAMC2    | 6     | 1,5784  | 5168  | 0,0525  | 5   | 2,0137  | 294 | 1 | 0,4353  | 10     | 1 | -1,5259 | 3     | 1 | -1,9613 |
| LRRC20   | 1658  | -0,2214 | 1620  | -0,1182 | 370 | -0,6506 | 306 | 1 | -0,4292 | 5563   | 1 | 0,1031  | 464   | 1 | 0,5324  |
| CD9      | 6900  | -0,0765 | 2425  | -0,0948 | 653 | -0,5043 | 309 | 1 | -0,4277 | 16052  | 1 | -0,0183 | 748   | 1 | 0,4095  |
| GALNT5   | 3142  | -0,1486 | 495   | -0,2013 | 493 | -0,5751 | 310 | 1 | -0,4264 | 9391   | 1 | -0,0526 | 877   | 1 | 0,3738  |
| PDLIM7   | 375   | 0,4993  | 87    | 0,3870  | 148 | 0,9251  | 312 | 1 | 0,4258  | 5113   | 1 | -0,1123 | 447   | 1 | -0,5381 |
| FHL3     | 2638  | 0,1665  | 2910  | 0,0842  | 461 | 0,5918  | 315 | 1 | 0,4253  | 6829   | 1 | -0,0823 | 500   | 1 | -0,5076 |
| IGFBP3   | 188   | 0,6603  | 248   | 0,2613  | 81  | 1,0846  | 318 | 1 | 0,4243  | 701    | 1 | -0,3991 | 149   | 1 | -0,8234 |
| SERPINB1 | 1244  | -0,2644 | 655   | -0,1791 | 330 | -0,6866 | 322 | 1 | -0,4222 | 6648   | 1 | 0,0852  | 501   | 1 | 0,5074  |
| PABPC4L  | 676   | 0,3740  | 6651  | 0,0395  | 223 | 0,7958  | 323 | 1 | 0,4219  | 965    | 1 | -0,3345 | 194   | 1 | -0,7564 |
| BMP2     | 7708  | 0,0675  | 12263 | 0,0131  | 697 | 0,4888  | 325 | 1 | 0,4213  | 9182,5 | 1 | -0,0545 | 562   | 1 | -0,4757 |
| RAET1G   | 5874  | 0,0911  | 20127 | 0,0036  | 644 | 0,5103  | 328 | 1 | 0,4193  | 6499   | 1 | -0,0875 | 503   | 1 | -0,5068 |
| DOCK2    | 67    | 0,8444  | 114   | 0,3597  | 52  | 1,2618  | 332 | 1 | 0,4174  | 470    | 1 | -0,4847 | 108   | 1 | -0,9021 |
| CNNM1    | 486   | -0,4394 | 156   | -0,3167 | 187 | -0,8563 | 334 | 1 | -0,4169 | 4618   | 1 | 0,1227  | 446   | 1 | 0,5396  |
| NCALD    | 9126  | -0,0535 | 1530  | -0,1224 | 752 | -0,4700 | 335 | 1 | -0,4166 | 7842   | 1 | -0,0689 | 996   | 1 | 0,3476  |
| ARHGEF40 | 135   | 0,7187  | 247   | 0,2614  | 66  | 1,1350  | 336 | 1 | 0,4163  | 533    | 1 | -0,4574 | 119   | 1 | -0,8737 |
| FAT3     | 22339 | -0,0074 | 360   | -0,2264 | 913 | -0,4224 | 337 | 1 | -0,4150 | 2059   | 1 | -0,2190 | 2299  | 1 | 0,1960  |
| SLC29A1  | 233   | 0,6080  | 849   | 0,1605  | 107 | 1,0228  | 338 | 1 | 0,4149  | 553    | 1 | -0,4475 | 123   | 1 | -0,8623 |
| B4GALT4  | 1273  | -0,2610 | 85    | -0,3900 | 340 | -0,6739 | 340 | 1 | -0,4128 | 4354   | 1 | -0,1290 | 1364  | 1 | 0,2839  |
| MMP2     | 4     | 1,6519  | 613   | 0,1836  | 4   | 2,0629  | 344 | 1 | 0,4110  | 15     | 1 | -1,4682 | 4     | 1 | -1,8792 |
| LPP      | 20100 | 0,0098  | 77    | 0,4044  | 919 | 0,4202  | 346 | 1 | 0,4104  | 720    | 1 | 0,3946  | 16877 | 1 | -0,0159 |
| GLDC     | 14551 | -0,0225 | 433   | -0,2113 | 882 | -0,4321 | 348 | 1 | -0,4096 | 2608   | 1 | -0,1888 | 1971  | 1 | 0,2208  |
| S100A6   | 11380 | -0,0376 | 316   | -0,2399 | 836 | -0,4467 | 349 | 1 | -0,4092 | 2350   | 1 | -0,2024 | 2125  | 1 | 0,2068  |
| AUTS2    | 2809  | 0,1598  | 1938  | 0,1080  | 511 | 0,5675  | 353 | 1 | 0,4077  | 9489   | 1 | -0,0518 | 603   | 1 | -0,4595 |
| FAM129A  | 22359 | 0,0073  | 376   | 0,2222  | 959 | 0,4134  | 354 | 1 | 0,4061  | 2129   | 1 | 0,2150  | 2394  | 1 | -0,1911 |
| ABCC3    | 1098  | -0,2847 | 2222  | -0,0998 | 325 | -0,6881 | 364 | 1 | -0,4034 | 2690   | 1 | 0,1849  | 363   | 1 | 0,5883  |
| DUSP7    | 2118  | 0,1897  | 1148  | 0,1409  | 465 | 0,5905  | 369 | 1 | 0,4008  | 9838   | 1 | -0,0488 | 632   | 1 | -0,4496 |
| ACO1     | 11064 | 0,0390  | 48    | 0,4717  | 860 | 0,4379  | 370 | 1 | 0,3989  | 600    | 1 | 0,4327  | 12001 | 1 | 0,0338  |
| PTGES    | 991   | -0,3019 | 430   | -0,2126 | 317 | -0,6973 | 376 | 1 | -0,3955 | 6386   | 1 | 0,0892  | 552   | 1 | 0,4847  |
| MMP7     | 5909  | -0,0906 | 854   | -0,1603 | 710 | -0,4854 | 378 | 1 | -0,3949 | 7781   | 1 | -0,0697 | 1104  | 1 | 0,3251  |
| LIPH     | 3084  | -0,1504 | 1425  | -0,1272 | 566 | -0,5444 | 380 | 1 | -0,3939 | 14305  | 1 | 0,0233  | 724   | 1 | 0,4172  |
| PACSIN3  | 678   | 0,3729  | 2585  | 0,0908  | 254 | 0,7636  | 386 | 1 | 0,3907  | 1329   | 1 | -0,2821 | 274   | 1 | -0,6728 |
| RGMB     | 8764  | 0,0566  | 2047  | 0,1046  | 835 | 0,4472  | 388 | 1 | 0,3906  | 9939   | 1 | 0,0479  | 1023  | 1 | -0,3426 |
| GXYLT2   | 235   | 0,6064  | 1980  | 0,1065  | 115 | 0,9968  | 389 | 1 | 0,3903  | 435    | 1 | -0,4999 | 113   | 1 | -0,8903 |

|               |       |         |      |         |      |         |     |   |         |       |   |         |      |   |         |
|---------------|-------|---------|------|---------|------|---------|-----|---|---------|-------|---|---------|------|---|---------|
| TSHZ3         | 489   | 0,4386  | 1986 | 0,1063  | 202  | 0,8287  | 390 | 1 | 0,3901  | 984   | 1 | -0,3323 | 224  | 1 | -0,7224 |
| KLHL21        | 3985  | 0,1254  | 2052 | 0,1044  | 632  | 0,5152  | 391 | 1 | 0,3898  | 14898 | 1 | -0,0210 | 745  | 1 | -0,4108 |
| KIAA1549L     | 112   | 0,7503  | 3051 | 0,0815  | 65   | 1,1391  | 393 | 1 | 0,3888  | 216   | 1 | -0,6689 | 61   | 1 | -1,0576 |
| SAT2          | 9101  | -0,0538 | 525  | -0,1962 | 852  | -0,4409 | 399 | 1 | -0,3871 | 3872  | 1 | -0,1424 | 1691 | 1 | 0,2447  |
| PURB          | 14365 | 0,0235  | 724  | 0,1712  | 978  | 0,4100  | 402 | 1 | 0,3866  | 3692  | 1 | 0,1477  | 1758 | 1 | -0,2388 |
| TNS1          | 3     | 1,6781  | 2519 | 0,0925  | 3    | 2,0641  | 403 | 1 | 0,3860  | 9     | 1 | -1,5856 | 2    | 1 | -1,9716 |
| COL4A1        | 12    | 1,3870  | 61   | 0,4466  | 8    | 1,7726  | 405 | 1 | 0,3855  | 66    | 1 | -0,9405 | 29   | 1 | -1,3260 |
| IL7R          | 138   | 0,7170  | 603  | 0,1852  | 74   | 1,1009  | 410 | 1 | 0,3839  | 379   | 1 | -0,5317 | 103  | 1 | -0,9156 |
| LFNG          | 310   | 0,5435  | 4201 | 0,0634  | 147  | 0,9272  | 412 | 1 | 0,3837  | 478   | 1 | -0,4801 | 122  | 1 | -0,8637 |
| TMC7          | 6088  | -0,0877 | 596  | -0,1857 | 753  | -0,4700 | 415 | 1 | -0,3824 | 5829  | 1 | -0,0981 | 1359 | 1 | 0,2843  |
| FLNA          | 1269  | 0,2614  | 88   | 0,3836  | 380  | 0,6429  | 420 | 1 | 0,3815  | 4650  | 1 | 0,1222  | 1560 | 1 | -0,2593 |
| MGLL          | 12140 | -0,0333 | 466  | -0,2055 | 971  | -0,4114 | 426 | 1 | -0,3781 | 2988  | 1 | -0,1722 | 2145 | 1 | 0,2059  |
| POMT1         | 7027  | -0,0749 | 600  | -0,1854 | 821  | -0,4501 | 435 | 1 | -0,3752 | 5194  | 1 | -0,1105 | 1517 | 1 | 0,2647  |
| TRHDE         | 21928 | 0,0093  | 2981 | 0,0829  | 1070 | 0,3838  | 439 | 1 | 0,3745  | 7456  | 1 | 0,0736  | 1252 | 1 | -0,3010 |
| SERPINH1      | 15813 | 0,0196  | 159  | 0,3154  | 1036 | 0,3939  | 441 | 1 | 0,3743  | 1206  | 1 | 0,2959  | 6845 | 1 | -0,0785 |
| C11orf86      | 715   | -0,3615 | 793  | -0,1647 | 277  | -0,7354 | 442 | 1 | -0,3739 | 2449  | 1 | 0,1968  | 396  | 1 | 0,5706  |
| RP11-438N16.1 | 26071 | -0,0039 | 240  | -0,2649 | 1107 | -0,3762 | 445 | 1 | -0,3723 | 1532  | 1 | -0,2609 | 4829 | 1 | 0,1114  |
| TOM1L2        | 8523  | -0,0587 | 575  | -0,1889 | 894  | -0,4298 | 450 | 1 | -0,3711 | 4311  | 1 | -0,1302 | 1730 | 1 | 0,2409  |
| PRR15         | 2328  | -0,1791 | 284  | -0,2478 | 548  | -0,5498 | 452 | 1 | -0,3707 | 7870  | 1 | -0,0687 | 1241 | 1 | 0,3020  |
| GRB7          | 2133  | -0,1892 | 502  | -0,1999 | 519  | -0,5591 | 455 | 1 | -0,3699 | 19150 | 1 | -0,0106 | 946  | 1 | 0,3593  |
| LURAP1L       | 3753  | -0,1316 | 9250 | -0,0232 | 661  | -0,5004 | 459 | 1 | -0,3689 | 5298  | 1 | 0,1083  | 559  | 1 | 0,4772  |
| CDK6          | 677   | 0,3738  | 214  | 0,2756  | 273  | 0,7422  | 460 | 1 | 0,3685  | 5826  | 1 | -0,0981 | 584  | 1 | -0,4666 |
| ST8SIA4       | 452   | -0,4567 | 69   | -0,4150 | 206  | -0,8240 | 465 | 1 | -0,3673 | 10710 | 1 | 0,0417  | 750  | 1 | 0,4090  |
| RAB31         | 8778  | -0,0565 | 938  | -0,1534 | 916  | -0,4220 | 469 | 1 | -0,3655 | 5902  | 1 | -0,0969 | 1477 | 1 | 0,2686  |
| GLI3          | 25514 | 0,0049  | 341  | 0,2315  | 1150 | 0,3696  | 473 | 1 | 0,3647  | 1949  | 1 | 0,2266  | 3708 | 1 | -0,1381 |
| FRMD6         | 21    | 1,2038  | 1939 | 0,1080  | 26   | 1,5683  | 475 | 1 | 0,3645  | 33    | 1 | -1,0958 | 16   | 1 | -1,4603 |
| SPATA20       | 1004  | -0,2992 | 511  | -0,1989 | 354  | -0,6626 | 476 | 1 | -0,3634 | 5701  | 1 | 0,1004  | 592  | 1 | 0,4638  |
| ST6GAL2       | 14557 | -0,0224 | 38   | -0,4908 | 1072 | -0,3832 | 487 | 1 | -0,3608 | 503   | 1 | -0,4684 | 5017 | 1 | -0,1077 |
| LACTB2        | 2813  | -0,1596 | 2606 | -0,0903 | 622  | -0,5186 | 490 | 1 | -0,3590 | 7818  | 1 | 0,0693  | 693  | 1 | 0,4283  |
| PIEZO1        | 536   | 0,4188  | 381  | 0,2214  | 240  | 0,7770  | 492 | 1 | 0,3582  | 2435  | 1 | -0,1975 | 422  | 1 | -0,5557 |
| VAV3          | 1507  | -0,2370 | 334  | -0,2352 | 456  | -0,5944 | 494 | 1 | -0,3574 | 28539 | 1 | 0,0018  | 947  | 1 | 0,3592  |
| ABCA12        | 6568  | -0,0811 | 681  | -0,1761 | 861  | -0,4377 | 498 | 1 | -0,3565 | 6032  | 1 | -0,0950 | 1542 | 1 | 0,2615  |
| TSPAN13       | 1647  | -0,2221 | 256  | -0,2588 | 486  | -0,5780 | 502 | 1 | -0,3559 | 11432 | 1 | -0,0368 | 1138 | 1 | 0,3191  |



|          |       |         |       |         |      |         |     |   |         |       |   |         |       |   |         |
|----------|-------|---------|-------|---------|------|---------|-----|---|---------|-------|---|---------|-------|---|---------|
| MYO5C    | 440   | -0,4640 | 1698  | -0,1157 | 208  | -0,8187 | 507 | 1 | -0,3548 | 895   | 1 | 0,3483  | 248   | 1 | 0,7031  |
| GAS6     | 1476  | 0,2397  | 2414  | 0,0951  | 459  | 0,5936  | 510 | 1 | 0,3538  | 3800  | 1 | -0,1447 | 517   | 1 | -0,4985 |
| GULP1    | 1376  | -0,2503 | 2410  | -0,0951 | 437  | -0,6023 | 513 | 1 | -0,3520 | 3476  | 1 | 0,1552  | 502   | 1 | 0,5072  |
| MARC1    | 2106  | -0,1904 | 512   | -0,1986 | 571  | -0,5424 | 514 | 1 | -0,3520 | 21951 | 1 | -0,0083 | 1016  | 1 | 0,3438  |
| TUFT1    | 502   | 0,4324  | 8379  | 0,0278  | 233  | 0,7837  | 518 | 1 | 0,3514  | 681   | 1 | -0,4046 | 195   | 1 | -0,7560 |
| ALPK2    | 547   | 0,4147  | 57    | 0,4513  | 250  | 0,7656  | 521 | 1 | 0,3509  | 11452 | 1 | 0,0366  | 1164  | 1 | -0,3143 |
| KLHL29   | 734   | 0,3579  | 1887  | 0,1096  | 307  | 0,7086  | 524 | 1 | 0,3507  | 1664  | 1 | -0,2484 | 350   | 1 | -0,5990 |
| ECH1     | 1926  | -0,2014 | 1116  | -0,1424 | 543  | -0,5517 | 527 | 1 | -0,3504 | 8751  | 1 | 0,0590  | 749   | 1 | 0,4093  |
| ALCAM    | 3274  | 0,1441  | 198   | 0,2853  | 688  | 0,4922  | 530 | 1 | 0,3481  | 3922  | 1 | 0,1412  | 2124  | 1 | -0,2069 |
| HSD3B7   | 5101  | -0,1027 | 2312  | -0,0975 | 826  | -0,4491 | 536 | 1 | -0,3464 | 24164 | 1 | 0,0052  | 977   | 1 | 0,3516  |
| NXPE3    | 1874  | 0,2050  | 81    | 0,3953  | 544  | 0,5513  | 537 | 1 | 0,3463  | 2583  | 1 | 0,1903  | 3137  | 1 | -0,1560 |
| PIK3CD   | 206   | 0,6382  | 8693  | 0,0261  | 120  | 0,9837  | 540 | 1 | 0,3455  | 264   | 1 | -0,6121 | 88    | 1 | -0,9575 |
| NXPH4    | 237   | 0,6036  | 3108  | 0,0805  | 139  | 0,9479  | 542 | 1 | 0,3443  | 394   | 1 | -0,5231 | 121   | 1 | -0,8674 |
| PLS1     | 241   | -0,5953 | 340   | -0,2319 | 143  | -0,9389 | 547 | 1 | -0,3437 | 825   | 1 | 0,3633  | 246   | 1 | 0,7070  |
| COL6A3   | 3770  | 0,1311  | 19209 | 0,0044  | 746  | 0,4722  | 554 | 1 | 0,3411  | 4448  | 1 | -0,1267 | 581   | 1 | -0,4679 |
| ADAM19   | 18    | 1,2528  | 486   | 0,2031  | 24   | 1,5920  | 558 | 1 | 0,3392  | 43    | 1 | -1,0497 | 19    | 1 | -1,3889 |
| SGK223   | 306   | -0,5479 | 2856  | -0,0850 | 170  | -0,8870 | 560 | 1 | -0,3391 | 523   | 1 | 0,4629  | 164   | 1 | 0,8020  |
| TNFSF15  | 622   | -0,3888 | 158   | -0,3157 | 282  | -0,7277 | 561 | 1 | -0,3389 | 7477  | 1 | 0,0731  | 743   | 1 | 0,4120  |
| SLC7A1   | 742   | 0,3557  | 1230  | 0,1362  | 321  | 0,6945  | 562 | 1 | 0,3388  | 2052  | 1 | -0,2195 | 419   | 1 | -0,5583 |
| PDE8B    | 366   | -0,5086 | 1872  | -0,1099 | 193  | -0,8473 | 564 | 1 | -0,3387 | 705   | 1 | 0,3987  | 214   | 1 | 0,7374  |
| PC       | 2315  | -0,1796 | 644   | -0,1806 | 624  | -0,5174 | 567 | 1 | -0,3379 | 29078 | 1 | -0,0010 | 1054  | 1 | 0,3369  |
| ITGA5    | 168   | 0,6843  | 1327  | 0,1311  | 108  | 1,0218  | 568 | 1 | 0,3374  | 350   | 1 | -0,5532 | 112   | 1 | -0,8907 |
| MKNK2    | 5744  | -0,0928 | 3849  | -0,0686 | 893  | -0,4299 | 570 | 1 | -0,3371 | 14055 | 1 | 0,0242  | 939   | 1 | 0,3613  |
| MLLT11   | 889   | 0,3227  | 645   | 0,1804  | 359  | 0,6590  | 575 | 1 | 0,3363  | 3882  | 1 | -0,1423 | 558   | 1 | -0,4786 |
| EXT1     | 5253  | 0,1005  | 401   | 0,2175  | 862  | 0,4363  | 576 | 1 | 0,3357  | 4880  | 1 | 0,1169  | 1993  | 1 | -0,2188 |
| C12orf80 | 21981 | -0,0093 | 1146  | -0,1410 | 1283 | -0,3429 | 581 | 1 | -0,3337 | 4241  | 1 | -0,1317 | 2210  | 1 | 0,2019  |
| HSPA2    | 3913  | -0,1272 | 179   | -0,3026 | 782  | -0,4592 | 589 | 1 | -0,3320 | 2899  | 1 | -0,1754 | 3126  | 1 | 0,1566  |
| GRAMD1A  | 5221  | -0,1011 | 73    | -0,4106 | 878  | -0,4329 | 590 | 1 | -0,3318 | 1118  | 1 | -0,3096 | 14724 | 1 | 0,0223  |
| S100A4   | 3144  | -0,1485 | 694   | -0,1750 | 730  | -0,4803 | 591 | 1 | -0,3317 | 13514 | 1 | -0,0265 | 1222  | 1 | 0,3052  |
| IQGAP2   | 1063  | -0,2905 | 465   | -0,2055 | 414  | -0,6210 | 593 | 1 | -0,3305 | 6667  | 1 | 0,0850  | 729   | 1 | 0,4154  |
| CREB5    | 25486 | 0,0049  | 1011  | 0,1481  | 1326 | 0,3350  | 596 | 1 | 0,3301  | 3842  | 1 | 0,1432  | 2468  | 1 | -0,1869 |
| ISYNA1   | 4417  | -0,1161 | 669   | -0,1774 | 844  | -0,4448 | 603 | 1 | -0,3288 | 8535  | 1 | -0,0613 | 1493  | 1 | 0,2675  |
| PMP22    | 443   | -0,4633 | 298   | -0,2451 | 226  | -0,7919 | 604 | 1 | -0,3286 | 2068  | 1 | 0,2182  | 434   | 1 | 0,5468  |

|               |       |         |       |         |      |         |     |   |         |         |   |         |       |   |         |
|---------------|-------|---------|-------|---------|------|---------|-----|---|---------|---------|---|---------|-------|---|---------|
| FOSL2         | 7747  | 0,0671  | 82    | 0,3936  | 1031 | 0,3955  | 606 | 1 | 0,3283  | 1012    | 1 | 0,3264  | 28422 | 1 | -0,0019 |
| PRNP          | 1138  | 0,2781  | 518   | 0,1974  | 435  | 0,6059  | 607 | 1 | 0,3278  | 6940    | 1 | -0,0807 | 752   | 1 | -0,4084 |
| MAP2K6        | 2919  | -0,1557 | 1138  | -0,1414 | 724  | -0,4821 | 610 | 1 | -0,3264 | 17629   | 1 | 0,0143  | 1033  | 1 | 0,3407  |
| LIMA1         | 1427  | 0,2453  | 22383 | 0,0024  | 501  | 0,5712  | 612 | 1 | 0,3259  | 1730    | 1 | -0,2429 | 400   | 1 | -0,5689 |
| CDC42EP2      | 670   | 0,3755  | 3843  | 0,0688  | 312  | 0,7011  | 614 | 1 | 0,3256  | 1134    | 1 | -0,3067 | 312   | 1 | -0,6323 |
| RP11-244F12.3 | 488   | 0,4389  | 1662  | 0,1170  | 252  | 0,7645  | 615 | 1 | 0,3256  | 1031    | 1 | -0,3219 | 300   | 1 | -0,6475 |
| RP11-688I9.2  | 4753  | 0,1089  | 5483  | 0,0495  | 871  | 0,4345  | 616 | 1 | 0,3256  | 8712    | 1 | -0,0594 | 827   | 1 | -0,3850 |
| ARRB2         | 931   | -0,3133 | 211   | -0,2776 | 390  | -0,6379 | 620 | 1 | -0,3246 | 11626   | 1 | 0,0357  | 943   | 1 | 0,3603  |
| BCOR          | 1282  | 0,2595  | 1398  | 0,1281  | 478  | 0,5840  | 621 | 1 | 0,3246  | 4253    | 1 | -0,1314 | 619   | 1 | -0,4560 |
| ZIC2          | 732   | 0,3584  | 926   | 0,1546  | 334  | 0,6827  | 623 | 1 | 0,3243  | 2332    | 1 | -0,2039 | 466   | 1 | -0,5281 |
| TRIM36        | 4608  | 0,1118  | 1806  | 0,1119  | 864  | 0,4359  | 624 | 1 | 0,3241  | 29639   | 1 | 0,0001  | 1106  | 1 | -0,3240 |
| RUNX1         | 228   | 0,6133  | 244   | 0,2634  | 144  | 0,9364  | 627 | 1 | 0,3231  | 887     | 1 | -0,3499 | 273   | 1 | -0,6730 |
| FERMT1        | 2039  | 0,1934  | 2685  | 0,0884  | 631  | 0,5156  | 634 | 1 | 0,3222  | 5453    | 1 | -0,1050 | 694   | 1 | -0,4272 |
| EFNA1         | 1176  | 0,2733  | 4692  | 0,0576  | 453  | 0,5954  | 636 | 1 | 0,3221  | 2115    | 1 | -0,2157 | 449   | 1 | -0,5378 |
| C10orf54      | 154   | -0,6986 | 853   | -0,1604 | 109  | -1,0206 | 637 | 1 | -0,3219 | 372     | 1 | 0,5382  | 125   | 1 | 0,8601  |
| B9D1          | 1942  | -0,2003 | 1018  | -0,1478 | 611  | -0,5217 | 640 | 1 | -0,3214 | 9414    | 1 | 0,0524  | 876   | 1 | 0,3739  |
| MIEN1         | 11688 | -0,0362 | 1952  | -0,1076 | 1206 | -0,3571 | 644 | 1 | -0,3209 | 7632    | 1 | -0,0714 | 1646  | 1 | 0,2494  |
| PTPN6         | 5513  | -0,0965 | 1060  | -0,1453 | 941  | -0,4168 | 647 | 1 | -0,3204 | 9837    | 1 | -0,0488 | 1450  | 1 | 0,2715  |
| IQSEC2        | 3555  | -0,1366 | 4595  | -0,0587 | 792  | -0,4566 | 649 | 1 | -0,3200 | 7131    | 1 | 0,0779  | 780   | 1 | 0,3979  |
| TRIML2        | 4523  | -0,1137 | 2115  | -0,1028 | 873  | -0,4337 | 650 | 1 | -0,3199 | 19095   | 1 | 0,0109  | 1078  | 1 | 0,3309  |
| LZTS2         | 6598  | -0,0807 | 923   | -0,1548 | 1009 | -0,4006 | 651 | 1 | -0,3199 | 7419    | 1 | -0,0741 | 1675  | 1 | 0,2458  |
| LRP12         | 751   | 0,3530  | 2226  | 0,0997  | 345  | 0,6715  | 660 | 1 | 0,3186  | 1616    | 1 | -0,2533 | 394   | 1 | -0,5719 |
| IL11          | 7     | 1,4991  | 39    | 0,4887  | 7    | 1,8171  | 663 | 1 | 0,3180  | 50      | 1 | -1,0104 | 28    | 1 | -1,3284 |
| PSMD2         | 287   | 0,5590  | 5874  | 0,0459  | 177  | 0,8754  | 674 | 1 | 0,3163  | 409     | 1 | -0,5131 | 145   | 1 | -0,8295 |
| HS3ST3A1      | 15058 | 0,0213  | 11824 | 0,0141  | 1320 | 0,3361  | 681 | 1 | 0,3148  | 22715,5 | 1 | -0,0071 | 1118  | 1 | -0,3220 |
| SDC1          | 582   | 0,4037  | 9965  | 0,0203  | 291  | 0,7180  | 683 | 1 | 0,3142  | 749     | 1 | -0,3834 | 252   | 1 | -0,6977 |
| RAB27B        | 391   | -0,4866 | 25337 | -0,0019 | 220  | -0,8006 | 684 | 1 | -0,3140 | 469     | 1 | 0,4847  | 166   | 1 | 0,7988  |
| RAB3B         | 2420  | 0,1748  | 404   | 0,2171  | 698  | 0,4888  | 685 | 1 | 0,3139  | 10625   | 1 | 0,0423  | 1448  | 1 | -0,2717 |
| PDGFC         | 230   | 0,6088  | 3578  | 0,0726  | 154  | 0,9221  | 688 | 1 | 0,3132  | 374     | 1 | -0,5363 | 132   | 1 | -0,8495 |
| FOXP1         | 39    | 1,0066  | 378   | 0,2218  | 41   | 1,3184  | 696 | 1 | 0,3118  | 135     | 1 | -0,7848 | 54    | 1 | -1,0966 |
| INHBA         | 89    | 0,7975  | 17259 | 0,0056  | 72   | 1,1089  | 699 | 1 | 0,3114  | 129     | 1 | -0,7919 | 52    | 1 | -1,1033 |
| CDYL2         | 3478  | 0,1386  | 10967 | 0,0167  | 824  | 0,4496  | 702 | 1 | 0,3109  | 4662    | 1 | -0,1219 | 680   | 1 | -0,4328 |
| TPBG          | 3635  | -0,1344 | 75    | -0,4075 | 845  | -0,4446 | 706 | 1 | -0,3102 | 1414    | 1 | -0,2730 | 11383 | 1 | 0,0372  |

|              |       |         |       |         |      |         |     |   |         |       |   |         |      |   |         |
|--------------|-------|---------|-------|---------|------|---------|-----|---|---------|-------|---|---------|------|---|---------|
| NT5E         | 101   | 0,7699  | 867   | 0,1596  | 82   | 1,0787  | 713 | 1 | 0,3088  | 267   | 1 | -0,6103 | 100  | 1 | -0,9191 |
| ITPR2        | 934   | 0,3123  | 4892  | 0,0555  | 415  | 0,6204  | 715 | 1 | 0,3081  | 1578  | 1 | -0,2568 | 405  | 1 | -0,5650 |
| LPCAT1       | 3424  | -0,1403 | 11244 | -0,0157 | 829  | -0,4480 | 719 | 1 | -0,3077 | 4538  | 1 | 0,1246  | 682  | 1 | 0,4323  |
| MARCH4       | 43    | 0,9864  | 3821  | 0,0692  | 43   | 1,2939  | 721 | 1 | 0,3075  | 75    | 1 | -0,9172 | 37   | 1 | -1,2248 |
| KIF13B       | 1094  | -0,2857 | 78    | -0,4030 | 462  | -0,5908 | 736 | 1 | -0,3051 | 4860  | 1 | -0,1173 | 2453 | 1 | 0,1878  |
| ROCK1        | 6503  | 0,0819  | 277   | 0,2517  | 1059 | 0,3866  | 737 | 1 | 0,3047  | 3065  | 1 | 0,1698  | 3816 | 1 | -0,1348 |
| AKR1B10      | 33    | -1,0575 | 4920  | -0,0551 | 39   | -1,3606 | 744 | 1 | -0,3030 | 51    | 1 | 1,0024  | 30   | 1 | 1,3054  |
| OAS1         | 1971  | -0,1978 | 741   | -0,1696 | 662  | -0,5004 | 746 | 1 | -0,3026 | 13041 | 1 | 0,0282  | 1079 | 1 | 0,3309  |
| ETS2         | 571   | 0,4076  | 195   | 0,2907  | 304  | 0,7095  | 751 | 1 | 0,3018  | 4878  | 1 | -0,1170 | 722  | 1 | -0,4188 |
| MYO18A       | 2117  | -0,1898 | 494   | -0,2015 | 689  | -0,4916 | 752 | 1 | -0,3018 | 18822 | 1 | -0,0118 | 1314 | 1 | 0,2901  |
| ENTPD7       | 4824  | 0,1075  | 7749  | 0,0315  | 986  | 0,4085  | 755 | 1 | 0,3011  | 7257  | 1 | -0,0760 | 858  | 1 | -0,3771 |
| ACBD5        | 4207  | -0,1204 | 744   | -0,1694 | 918  | -0,4213 | 756 | 1 | -0,3010 | 9806  | 1 | -0,0491 | 1617 | 1 | 0,2519  |
| SLC45A3      | 864   | 0,3287  | 8208  | 0,0288  | 401  | 0,6295  | 759 | 1 | 0,3008  | 1170  | 1 | -0,2999 | 346  | 1 | -0,6007 |
| PERP         | 4577  | -0,1125 | 1087  | -0,1440 | 961  | -0,4132 | 760 | 1 | -0,3007 | 12405 | 1 | -0,0315 | 1472 | 1 | 0,2692  |
| CACNG6       | 2010  | -0,1949 | 352   | -0,2277 | 680  | -0,4952 | 762 | 1 | -0,3003 | 12155 | 1 | -0,0328 | 1492 | 1 | 0,2675  |
| TRIM6        | 882   | -0,3246 | 5390  | -0,0504 | 410  | -0,6247 | 764 | 1 | -0,3001 | 1402  | 1 | 0,2742  | 387  | 1 | 0,5743  |
| PAWR         | 1335  | 0,2543  | 1495  | 0,1240  | 535  | 0,5543  | 766 | 1 | 0,3000  | 4307  | 1 | -0,1303 | 690  | 1 | -0,4303 |
| SOX8         | 3776  | 0,1311  | 14730 | 0,0084  | 889  | 0,4308  | 767 | 1 | 0,2998  | 4623  | 1 | -0,1226 | 714  | 1 | -0,4224 |
| ADRA1B       | 1580  | -0,2287 | 2198  | -0,1006 | 599  | -0,5276 | 774 | 1 | -0,2989 | 4386  | 1 | 0,1281  | 695  | 1 | 0,4270  |
| RP11-688I9.4 | 12657 | 0,0304  | 6691  | 0,0391  | 1389 | 0,3272  | 782 | 1 | 0,2967  | 21684 | 1 | 0,0087  | 1326 | 1 | -0,2881 |
| MSN          | 819   | 0,3401  | 1569  | 0,1206  | 394  | 0,6364  | 788 | 1 | 0,2963  | 2051  | 1 | -0,2196 | 493  | 1 | -0,5159 |
| ALOX12P2     | 1416  | -0,2466 | 863   | -0,1598 | 575  | -0,5410 | 798 | 1 | -0,2944 | 6546  | 1 | 0,0868  | 842  | 1 | 0,3812  |
| UBB          | 8574  | -0,0583 | 1481  | -0,1247 | 1226 | -0,3526 | 799 | 1 | -0,2944 | 8084  | 1 | -0,0664 | 1890 | 1 | 0,2280  |
| TMC5         | 340   | -0,5217 | 1949  | -0,1077 | 210  | -0,8157 | 801 | 1 | -0,2940 | 648   | 1 | 0,4141  | 243  | 1 | 0,7080  |
| UCP2         | 6120  | -0,0872 | 4041  | -0,0657 | 1088 | -0,3802 | 810 | 1 | -0,2930 | 14784 | 1 | 0,0216  | 1160 | 1 | 0,3146  |
| HSPB8        | 766   | 0,3495  | 1448  | 0,1261  | 382  | 0,6424  | 811 | 1 | 0,2929  | 1990  | 1 | -0,2234 | 490  | 1 | -0,5163 |
| ANPEP        | 196   | 0,6516  | 855   | 0,1603  | 140  | 0,9444  | 812 | 1 | 0,2928  | 453   | 1 | -0,4914 | 176  | 1 | -0,7841 |
| COL4A2       | 45    | 0,9815  | 188   | 0,2956  | 48   | 1,2739  | 816 | 1 | 0,2925  | 203   | 1 | -0,6858 | 80   | 1 | -0,9783 |
| DLG3         | 1560  | -0,2317 | 233   | -0,2688 | 614  | -0,5212 | 836 | 1 | -0,2895 | 11375 | 1 | -0,0372 | 1613 | 1 | 0,2524  |
| LPAR1        | 380   | -0,4938 | 1658  | -0,1170 | 235  | -0,7830 | 839 | 1 | -0,2892 | 773   | 1 | 0,3768  | 280  | 1 | 0,6660  |
| SCRN2        | 9805  | -0,0480 | 422   | -0,2138 | 1313 | -0,3371 | 842 | 1 | -0,2891 | 3168  | 1 | -0,1658 | 4253 | 1 | 0,1233  |
| CALD1        | 481   | 0,4424  | 3194  | 0,0788  | 279  | 0,7315  | 843 | 1 | 0,2891  | 824   | 1 | -0,3635 | 296  | 1 | -0,6527 |
| HRH1         | 960   | 0,3066  | 4497  | 0,0599  | 455  | 0,5950  | 847 | 1 | 0,2884  | 1684  | 1 | -0,2467 | 455  | 1 | -0,5351 |

|          |       |         |      |         |      |         |      |   |         |       |   |         |       |   |         |
|----------|-------|---------|------|---------|------|---------|------|---|---------|-------|---|---------|-------|---|---------|
| LSMD1    | 1209  | -0,2687 | 467  | -0,2055 | 529  | -0,5567 | 855  | 1 | -0,2880 | 8352  | 1 | 0,0632  | 980   | 1 | 0,3512  |
| SALL4    | 6502  | -0,0819 | 818  | -0,1629 | 1149 | -0,3697 | 856  | 1 | -0,2877 | 6923  | 1 | -0,0809 | 2126  | 1 | 0,2068  |
| COL21A1  | 1289  | -0,2590 | 453  | -0,2074 | 559  | -0,5466 | 857  | 1 | -0,2875 | 9505  | 1 | 0,0516  | 1039  | 1 | 0,3391  |
| ICT1     | 2354  | -0,1781 | 489  | -0,2023 | 762  | -0,4652 | 860  | 1 | -0,2871 | 14056 | 1 | -0,0242 | 1533  | 1 | 0,2629  |
| MAST4    | 2499  | -0,1718 | 610  | -0,1837 | 783  | -0,4588 | 861  | 1 | -0,2870 | 18796 | 1 | -0,0119 | 1420  | 1 | 0,2751  |
| CHST7    | 1450  | 0,2428  | 3816 | 0,0692  | 598  | 0,5285  | 869  | 1 | 0,2857  | 2946  | 1 | -0,1736 | 604   | 1 | -0,4592 |
| AP1S2    | 446   | 0,4602  | 485  | 0,2031  | 270  | 0,7455  | 872  | 1 | 0,2852  | 1575  | 1 | -0,2571 | 443   | 1 | -0,5423 |
| LRRC23   | 9901  | -0,0473 | 2999 | -0,0825 | 1352 | -0,3321 | 877  | 1 | -0,2848 | 11729 | 1 | -0,0351 | 1642  | 1 | 0,2497  |
| SEPT9    | 1967  | -0,1981 | 265  | -0,2550 | 725  | -0,4820 | 881  | 1 | -0,2839 | 8939  | 1 | -0,0568 | 1903  | 1 | 0,2270  |
| GALM     | 1206  | -0,2696 | 234  | -0,2683 | 542  | -0,5519 | 893  | 1 | -0,2823 | 28691 | 1 | 0,0013  | 1368  | 1 | 0,2835  |
| SRPX     | 242   | 0,5936  | 3012 | 0,0822  | 176  | 0,8757  | 895  | 1 | 0,2821  | 413   | 1 | -0,5114 | 169   | 1 | -0,7935 |
| CDH1     | 244   | -0,5923 | 930  | -0,1542 | 178  | -0,8742 | 897  | 1 | -0,2819 | 584   | 1 | 0,4380  | 227   | 1 | 0,7199  |
| SHMT1    | 12121 | -0,0335 | 1618 | -0,1184 | 1482 | -0,3131 | 909  | 1 | -0,2796 | 6674  | 1 | -0,0849 | 2322  | 1 | 0,1947  |
| OLFML3   | 4195  | 0,1207  | 83   | 0,3918  | 1011 | 0,4001  | 910  | 1 | 0,2795  | 1434  | 1 | 0,2711  | 21832 | 1 | -0,0083 |
| AMZ2     | 2584  | -0,1686 | 586  | -0,1869 | 830  | -0,4478 | 913  | 1 | -0,2792 | 16017 | 1 | -0,0184 | 1549  | 1 | 0,2609  |
| ANXA8L1  | 2620  | 0,1672  | 3457 | 0,0746  | 837  | 0,4464  | 916  | 1 | 0,2791  | 6189  | 1 | -0,0926 | 886   | 1 | -0,3717 |
| CYB5A    | 712   | -0,3621 | 6508 | -0,0406 | 384  | -0,6407 | 923  | 1 | -0,2785 | 1033  | 1 | 0,3215  | 348   | 1 | 0,6001  |
| CAMK2D   | 363   | -0,5103 | 673  | -0,1770 | 228  | -0,7874 | 938  | 1 | -0,2770 | 973   | 1 | 0,3334  | 334   | 1 | 0,6104  |
| TGFB1I1  | 459   | 0,4484  | 263  | 0,2566  | 288  | 0,7225  | 958  | 1 | 0,2741  | 2550  | 1 | -0,1918 | 588   | 1 | -0,4659 |
| CPM      | 4802  | -0,1078 | 5494 | -0,0494 | 1083 | -0,3813 | 964  | 1 | -0,2736 | 8812  | 1 | 0,0584  | 1071  | 1 | 0,3320  |
| MTMR4    | 6103  | -0,0874 | 462  | -0,2061 | 1192 | -0,3610 | 965  | 1 | -0,2735 | 4802  | 1 | -0,1186 | 3172  | 1 | 0,1549  |
| C1orf116 | 180   | -0,6674 | 222  | -0,2732 | 142  | -0,9404 | 969  | 1 | -0,2730 | 721   | 1 | 0,3942  | 279   | 1 | 0,6671  |
| FAM107B  | 952   | -0,3072 | 2732 | -0,0873 | 482  | -0,5800 | 971  | 1 | -0,2728 | 2043  | 1 | 0,2200  | 529   | 1 | 0,4927  |
| VEGFA    | 103   | 0,7671  | 123  | 0,3499  | 99   | 1,0396  | 975  | 1 | 0,2725  | 641   | 1 | -0,4172 | 256   | 1 | -0,6897 |
| CHP1     | 824   | -0,3392 | 865  | -0,1598 | 425  | -0,6112 | 981  | 1 | -0,2720 | 2819  | 1 | 0,1795  | 628   | 1 | 0,4515  |
| RPPH1    | 518   | 0,4259  | 666  | 0,1779  | 4089 | 0,1549  | 990  | 1 | -0,2710 | 1669  | 1 | -0,2480 | 14489 | 1 | 0,0230  |
| SLC39A13 | 901   | 0,3199  | 3547 | 0,0732  | 464  | 0,5907  | 991  | 1 | 0,2708  | 1682  | 1 | -0,2467 | 488   | 1 | -0,5175 |
| KLF5     | 2225  | -0,1843 | 312  | -0,2403 | 807  | -0,4536 | 1002 | 1 | -0,2693 | 9020  | 1 | -0,0560 | 2048  | 1 | 0,2133  |
| MPP1     | 7430  | -0,0706 | 559  | -0,1913 | 1299 | -0,3389 | 1010 | 1 | -0,2683 | 4713  | 1 | -0,1206 | 3374  | 1 | 0,1476  |
| LARGE    | 1922  | 0,2015  | 2504 | 0,0928  | 755  | 0,4689  | 1021 | 1 | 0,2674  | 5280  | 1 | -0,1087 | 864   | 1 | -0,3760 |
| IGDCC4   | 2152  | -0,1880 | 1157 | -0,1407 | 798  | -0,4553 | 1022 | 1 | -0,2673 | 10010 | 1 | 0,0472  | 1161  | 1 | 0,3145  |
| FGL1     | 6655  | -0,0799 | 1296 | -0,1328 | 1258 | -0,3468 | 1028 | 1 | -0,2669 | 9365  | 1 | -0,0529 | 2041  | 1 | 0,2141  |
| ALDH3B1  | 724   | -0,3597 | 7809 | -0,0310 | 406  | -0,6260 | 1033 | 1 | -0,2663 | 1001  | 1 | 0,3287  | 353   | 1 | 0,5950  |



|               |       |         |       |         |       |         |      |   |         |       |   |         |       |   |         |
|---------------|-------|---------|-------|---------|-------|---------|------|---|---------|-------|---|---------|-------|---|---------|
| ANKEF1        | 378   | -0,4955 | 5151  | -0,0527 | 255   | -0,7614 | 1035 | 1 | -0,2659 | 570   | 1 | 0,4428  | 240   | 1 | 0,7088  |
| SETBP1        | 552   | 0,4130  | 1610  | 0,1189  | 335   | 0,6779  | 1043 | 1 | 0,2648  | 1215  | 1 | -0,2941 | 418   | 1 | -0,5590 |
| SNORA23       | 962   | 0,3062  | 6742  | 0,0386  | 11626 | 0,0422  | 1049 | 1 | -0,2640 | 1457  | 1 | -0,2676 | 24881 | 1 | -0,0036 |
| RP11-674N23.1 | 872   | -0,3265 | 1309  | -0,1320 | 466   | -0,5904 | 1051 | 1 | -0,2639 | 2499  | 1 | 0,1945  | 609   | 1 | 0,4584  |
| PECR          | 5774  | -0,0923 | 3877  | -0,0681 | 1212  | -0,3561 | 1053 | 1 | -0,2638 | 14054 | 1 | 0,0242  | 1329  | 1 | 0,2879  |
| FAM126A       | 2004  | 0,1953  | 1082  | 0,1442  | 784   | 0,4586  | 1058 | 1 | 0,2632  | 9575  | 1 | -0,0511 | 1163  | 1 | -0,3143 |
| THRA          | 10243 | -0,0448 | 696   | -0,1744 | 1523  | -0,3075 | 1065 | 1 | -0,2627 | 4331  | 1 | -0,1296 | 3880  | 1 | 0,1332  |
| PDGFD         | 702   | -0,3650 | 1849  | -0,1106 | 404   | -0,6266 | 1070 | 1 | -0,2616 | 1600  | 1 | 0,2544  | 492   | 1 | 0,5160  |
| HR            | 7866  | -0,0659 | 6523  | -0,0404 | 1386  | -0,3273 | 1074 | 1 | -0,2615 | 13771 | 1 | 0,0254  | 1337  | 1 | 0,2869  |
| MCFD2         | 1835  | 0,2077  | 1368  | 0,1297  | 756   | 0,4687  | 1077 | 1 | 0,2610  | 7123  | 1 | -0,0780 | 1043  | 1 | -0,3391 |
| FCGBP         | 6260  | -0,0851 | 2110  | -0,1029 | 1264  | -0,3460 | 1082 | 1 | -0,2608 | 16193 | 1 | -0,0177 | 1712  | 1 | 0,2431  |
| EVA1C         | 1101  | -0,2843 | 6302  | -0,0421 | 563   | -0,5448 | 1087 | 1 | -0,2605 | 1742  | 1 | 0,2421  | 508   | 1 | 0,5026  |
| IFT81         | 1610  | -0,2253 | 1648  | -0,1173 | 712   | -0,4844 | 1098 | 1 | -0,2591 | 5316  | 1 | 0,1080  | 911   | 1 | 0,3671  |
| GPX4          | 5469  | -0,0970 | 2799  | -0,0860 | 1214  | -0,3557 | 1101 | 1 | -0,2587 | 19086 | 1 | 0,0110  | 1469  | 1 | 0,2697  |
| PLAU          | 47    | 0,9648  | 368   | 0,2241  | 58    | 1,2225  | 1111 | 1 | 0,2577  | 160   | 1 | -0,7407 | 73    | 1 | -0,9984 |
| KALRN         | 566   | 0,4094  | 4472  | 0,0602  | 348   | 0,6671  | 1112 | 1 | 0,2577  | 892   | 1 | -0,3493 | 337   | 1 | -0,6069 |
| ZBTB38        | 1270  | 0,2614  | 386   | 0,2205  | 623   | 0,5183  | 1120 | 1 | 0,2569  | 10806 | 1 | -0,0409 | 1274  | 1 | -0,2978 |
| AVPI1         | 263   | -0,5743 | 987   | -0,1500 | 201   | -0,8309 | 1124 | 1 | -0,2565 | 623   | 1 | 0,4243  | 268   | 1 | 0,6808  |
| SOX2          | 910   | -0,3176 | 1029  | -0,1472 | 497   | -0,5737 | 1128 | 1 | -0,2561 | 3047  | 1 | 0,1705  | 696   | 1 | 0,4266  |
| NTRK3         | 7661  | 0,0682  | 9     | 0,7829  | 1408  | 0,3241  | 1129 | 1 | 0,2560  | 185   | 1 | 0,7147  | 607   | 1 | 0,4588  |
| FA2H          | 175   | -0,6742 | 913   | -0,1555 | 145   | -0,9291 | 1140 | 1 | -0,2549 | 401   | 1 | 0,5187  | 183   | 1 | 0,7735  |
| KDSR          | 979   | 0,3036  | 7687  | 0,0319  | 525   | 0,5582  | 1145 | 1 | 0,2546  | 1427  | 1 | -0,2717 | 468   | 1 | -0,5263 |
| SLC16A5       | 1552  | -0,2321 | 1358  | -0,1300 | 708   | -0,4858 | 1160 | 1 | -0,2537 | 5629  | 1 | 0,1021  | 961   | 1 | 0,3558  |
| VCL           | 1189  | 0,2712  | 139   | 0,3334  | 604   | 0,5248  | 1161 | 1 | 0,2537  | 8456  | 1 | 0,0622  | 2388  | 1 | -0,1914 |
| SYNDIG1       | 3760  | 0,1314  | 5501  | 0,0493  | 1064  | 0,3848  | 1164 | 1 | 0,2534  | 6852  | 1 | -0,0820 | 1056  | 1 | -0,3355 |
| NXN           | 564   | -0,4096 | 4708  | -0,0575 | 353   | -0,6627 | 1166 | 1 | -0,2531 | 874   | 1 | 0,3521  | 340   | 1 | 0,6053  |
| DUSP4         | 429   | -0,4688 | 3790  | -0,0696 | 289   | -0,7214 | 1170 | 1 | -0,2526 | 700   | 1 | 0,3992  | 297   | 1 | 0,6518  |
| MRPS23        | 2547  | -0,1701 | 309   | -0,2417 | 912   | -0,4225 | 1171 | 1 | -0,2525 | 7606  | 1 | -0,0717 | 2588  | 1 | 0,1808  |
| KCTD11        | 461   | 0,4480  | 20042 | 0,0038  | 314   | 0,7004  | 1173 | 1 | 0,2524  | 565   | 1 | -0,4443 | 253   | 1 | -0,6966 |
| FXYS5         | 627   | 0,3879  | 3772  | 0,0699  | 385   | 0,6402  | 1174 | 1 | 0,2523  | 1054  | 1 | -0,3180 | 397   | 1 | -0,5702 |
| FSTL4         | 2808  | -0,1599 | 1507  | -0,1234 | 969   | -0,4117 | 1177 | 1 | -0,2519 | 11509 | 1 | 0,0364  | 1324  | 1 | 0,2883  |
| ZC3H12A       | 2599  | 0,1680  | 1191  | 0,1387  | 921   | 0,4198  | 1178 | 1 | 0,2518  | 12830 | 1 | -0,0293 | 1386  | 1 | -0,2811 |
| ITGB3         | 355   | 0,5140  | 5858  | 0,0460  | 249   | 0,7657  | 1180 | 1 | 0,2517  | 505   | 1 | -0,4680 | 228   | 1 | -0,7197 |

|               |       |         |       |         |      |         |      |   |         |        |   |         |      |   |         |
|---------------|-------|---------|-------|---------|------|---------|------|---|---------|--------|---|---------|------|---|---------|
| PFKFB4        | 1827  | 0,2084  | 14616 | 0,0087  | 780  | 0,4594  | 1190 | 1 | 0,2511  | 2395   | 1 | -0,1997 | 631  | 1 | -0,4508 |
| CD274         | 2573  | 0,1690  | 1187  | 0,1389  | 927  | 0,4195  | 1196 | 1 | 0,2505  | 12675  | 1 | -0,0302 | 1389 | 1 | -0,2806 |
| PIEZO2        | 8882  | -0,0557 | 1558  | -0,1211 | 1549 | -0,3054 | 1207 | 1 | -0,2497 | 8165   | 1 | -0,0654 | 2527 | 1 | 0,1844  |
| SELM          | 1377  | 0,2500  | 4674  | 0,0578  | 667  | 0,4994  | 1213 | 1 | 0,2495  | 2541   | 1 | -0,1922 | 656  | 1 | -0,4417 |
| KDELC2        | 1566  | 0,2311  | 954   | 0,1520  | 732  | 0,4802  | 1215 | 1 | 0,2490  | 7037   | 1 | -0,0791 | 1094 | 1 | -0,3282 |
| GPRIN2        | 2889  | -0,1566 | 2753  | -0,0867 | 997  | -0,4043 | 1228 | 1 | -0,2477 | 7768   | 1 | 0,0699  | 1147 | 1 | 0,3176  |
| MUC5B         | 464   | -0,4472 | 329   | -0,2365 | 320  | -0,6948 | 1231 | 1 | -0,2477 | 2213   | 1 | 0,2107  | 610  | 1 | 0,4584  |
| UNC5B         | 7235  | 0,0727  | 10990 | 0,0167  | 1437 | 0,3203  | 1232 | 1 | 0,2476  | 9029,5 | 1 | -0,0559 | 1233 | 1 | -0,3036 |
| NAGLU         | 5974  | -0,0896 | 770   | -0,1666 | 1314 | -0,3371 | 1234 | 1 | -0,2475 | 7185   | 1 | -0,0770 | 2811 | 1 | 0,1705  |
| KANK1         | 1856  | -0,2062 | 199   | -0,2848 | 810  | -0,4524 | 1258 | 1 | -0,2462 | 7078   | 1 | -0,0786 | 2864 | 1 | 0,1676  |
| RP11-479G22.8 | 1365  | 0,2508  | 514   | 0,1978  | 675  | 0,4968  | 1260 | 1 | 0,2460  | 9362   | 1 | -0,0529 | 1266 | 1 | -0,2989 |
| C3orf52       | 132   | 0,7230  | 14618 | 0,0087  | 127  | 0,9689  | 1263 | 1 | 0,2459  | 186    | 1 | -0,7144 | 84   | 1 | -0,9603 |
| G3BP1         | 4227  | 0,1200  | 946   | 0,1529  | 1174 | 0,3649  | 1270 | 1 | 0,2449  | 12131  | 1 | 0,0329  | 2062 | 1 | -0,2120 |
| SIRT7         | 2594  | -0,1683 | 1141  | -0,1413 | 965  | -0,4125 | 1280 | 1 | -0,2442 | 13413  | 1 | 0,0270  | 1453 | 1 | 0,2712  |
| MRPS7         | 3573  | -0,1361 | 274   | -0,2525 | 1089 | -0,3801 | 1284 | 1 | -0,2440 | 4906   | 1 | -0,1164 | 4082 | 1 | 0,1276  |
| TC2N          | 2578  | -0,1688 | 1298  | -0,1327 | 967  | -0,4118 | 1292 | 1 | -0,2430 | 11573  | 1 | 0,0360  | 1395 | 1 | 0,2791  |
| TRAPPC6A      | 17072 | -0,0161 | 1227  | -0,1365 | 1989 | -0,2587 | 1293 | 1 | -0,2427 | 4722   | 1 | -0,1204 | 4312 | 1 | 0,1222  |
| TMEM184A      | 8503  | -0,0589 | 5701  | -0,0475 | 1576 | -0,3013 | 1297 | 1 | -0,2424 | 18957  | 1 | 0,0114  | 1602 | 1 | 0,2538  |
| SQRDL         | 1641  | -0,2223 | 4465  | -0,0602 | 763  | -0,4647 | 1298 | 1 | -0,2424 | 3263   | 1 | 0,1621  | 759  | 1 | 0,4044  |
| ASF1A         | 4759  | 0,1088  | 4250  | 0,0628  | 1237 | 0,3506  | 1301 | 1 | 0,2419  | 10158  | 1 | -0,0460 | 1331 | 1 | -0,2878 |
| ANKRD13A      | 1439  | 0,2442  | 1671  | 0,1166  | 711  | 0,4853  | 1310 | 1 | 0,2411  | 4407   | 1 | -0,1277 | 900  | 1 | -0,3688 |
| PLA2G16       | 1125  | -0,2807 | 388   | -0,2200 | 613  | -0,5213 | 1316 | 1 | -0,2406 | 8589   | 1 | 0,0607  | 1248 | 1 | 0,3013  |
| GDF15         | 139   | -0,7167 | 187   | -0,2971 | 132  | -0,9572 | 1317 | 1 | -0,2406 | 633    | 1 | 0,4196  | 285  | 1 | 0,6601  |
| IL15          | 606   | 0,3943  | 483   | 0,2034  | 396  | 0,6347  | 1322 | 1 | 0,2404  | 2571   | 1 | -0,1909 | 688  | 1 | -0,4313 |
| AXIN2         | 16749 | -0,0174 | 4912  | -0,0552 | 2011 | -0,2571 | 1333 | 1 | -0,2397 | 11285  | 1 | -0,0378 | 2212 | 1 | 0,2019  |
| ABHD15        | 9472  | -0,0506 | 1283  | -0,1335 | 1687 | -0,2900 | 1341 | 1 | -0,2394 | 6783   | 1 | -0,0829 | 3128 | 1 | 0,1565  |
| UPP1          | 279   | -0,5623 | 4818  | -0,0562 | 219  | -0,8012 | 1349 | 1 | -0,2389 | 429    | 1 | 0,5062  | 208  | 1 | 0,7450  |
| MXD1          | 1877  | 0,2049  | 17234 | 0,0056  | 847  | 0,4435  | 1352 | 1 | 0,2386  | 2404   | 1 | -0,1993 | 665  | 1 | -0,4379 |
| ZNF697        | 545   | 0,4160  | 6444  | 0,0411  | 366  | 0,6545  | 1353 | 1 | 0,2385  | 779    | 1 | -0,3750 | 329  | 1 | -0,6134 |
| SEC14L1       | 4718  | -0,1098 | 442   | -0,2099 | 1254 | -0,3474 | 1363 | 1 | -0,2376 | 5721   | 1 | -0,1002 | 3728 | 1 | 0,1374  |
| AP000479.1    | 6267  | 0,0851  | 24711 | 0,0021  | 1419 | 0,3224  | 1367 | 1 | 0,2373  | 6782   | 1 | -0,0829 | 1129 | 1 | -0,3203 |
| MB21D2        | 1748  | 0,2148  | 601   | 0,1853  | 814  | 0,4517  | 1371 | 1 | 0,2370  | 12816  | 1 | -0,0294 | 1503 | 1 | -0,2664 |
| GATM          | 9606  | -0,0493 | 833   | -0,1622 | 1724 | -0,2860 | 1374 | 1 | -0,2367 | 5093   | 1 | -0,1130 | 4237 | 1 | 0,1238  |

|          |       |         |       |         |      |         |      |   |         |       |   |         |      |   |         |
|----------|-------|---------|-------|---------|------|---------|------|---|---------|-------|---|---------|------|---|---------|
| KCNMA1   | 995   | 0,3014  | 1747  | 0,1139  | 581  | 0,5377  | 1378 | 1 | 0,2363  | 2642  | 1 | -0,1874 | 709  | 1 | -0,4238 |
| PRKD3    | 1749  | 0,2147  | 1013  | 0,1480  | 822  | 0,4500  | 1390 | 1 | 0,2353  | 8052  | 1 | -0,0667 | 1240 | 1 | -0,3020 |
| MRPL10   | 4949  | -0,1054 | 203   | -0,2817 | 1294 | -0,3405 | 1395 | 1 | -0,2350 | 2882  | 1 | -0,1763 | 8578 | 1 | 0,0588  |
| CASC15   | 6299  | 0,0847  | 10557 | 0,0182  | 1446 | 0,3193  | 1404 | 1 | 0,2346  | 8072  | 1 | -0,0665 | 1250 | 1 | -0,3011 |
| NDST1    | 510   | 0,4295  | 1687  | 0,1159  | 352  | 0,6638  | 1409 | 1 | 0,2343  | 1084  | 1 | -0,3136 | 432  | 1 | -0,5479 |
| FGA      | 3030  | -0,1523 | 948   | -0,1526 | 1058 | -0,3866 | 1410 | 1 | -0,2342 | 29594 | 1 | -0,0002 | 1820 | 1 | 0,2340  |
| ANXA8L2  | 2095  | 0,1909  | 5667  | 0,0478  | 906  | 0,4248  | 1412 | 1 | 0,2339  | 3844  | 1 | -0,1431 | 859  | 1 | -0,3770 |
| CACNA1G  | 374   | -0,4994 | 736   | -0,1703 | 278  | -0,7330 | 1417 | 1 | -0,2337 | 999   | 1 | 0,3291  | 411  | 1 | 0,5628  |
| PFKFB3   | 3483  | -0,1386 | 231   | -0,2691 | 1131 | -0,3722 | 1419 | 1 | -0,2336 | 4296  | 1 | -0,1305 | 5259 | 1 | 0,1031  |
| LINGO2   | 20936 | 0,0093  | 6753  | 0,0385  | 2199 | 0,2428  | 1421 | 1 | 0,2335  | 12838 | 1 | 0,0292  | 2169 | 1 | -0,2042 |
| CUEDC1   | 3445  | -0,1396 | 597   | -0,1857 | 1126 | -0,3731 | 1422 | 1 | -0,2335 | 10144 | 1 | -0,0461 | 2461 | 1 | 0,1874  |
| GDF6     | 218   | 0,6249  | 12044 | 0,0136  | 185  | 0,8573  | 1439 | 1 | 0,2324  | 265   | 1 | -0,6113 | 137  | 1 | -0,8437 |
| SLC6A17  | 888   | 0,3230  | 4288  | 0,0624  | 533  | 0,5549  | 1443 | 1 | 0,2319  | 1536  | 1 | -0,2606 | 531  | 1 | -0,4925 |
| SEMA4B   | 791   | -0,3439 | 5041  | -0,0539 | 490  | -0,5756 | 1448 | 1 | -0,2317 | 1252  | 1 | 0,2900  | 477  | 1 | 0,5217  |
| SLC25A1  | 4757  | -0,1089 | 506   | -0,1993 | 1295 | -0,3401 | 1454 | 1 | -0,2313 | 6318  | 1 | -0,0904 | 3593 | 1 | 0,1409  |
| ACP2     | 662   | 0,3777  | 9505  | 0,0223  | 430  | 0,6089  | 1456 | 1 | 0,2312  | 860   | 1 | -0,3554 | 364  | 1 | -0,5866 |
| AGFG2    | 445   | -0,4610 | 470   | -0,2048 | 322  | -0,6917 | 1464 | 1 | -0,2307 | 1588  | 1 | 0,2562  | 548  | 1 | 0,4869  |
| FAM102A  | 2344  | -0,1785 | 319   | -0,2389 | 982  | -0,4092 | 1465 | 1 | -0,2307 | 8623  | 1 | -0,0604 | 2816 | 1 | 0,1703  |
| ROBO1    | 802   | 0,3429  | 2773  | 0,0864  | 498  | 0,5731  | 1471 | 1 | 0,2302  | 1582  | 1 | -0,2565 | 550  | 1 | -0,4867 |
| FGG      | 6346  | -0,0841 | 1536  | -0,1222 | 1476 | -0,3142 | 1474 | 1 | -0,2301 | 11234 | 1 | -0,0381 | 2379 | 1 | 0,1920  |
| C8orf47  | 7263  | -0,0725 | 2713  | -0,0877 | 1568 | -0,3026 | 1475 | 1 | -0,2301 | 17226 | 1 | -0,0151 | 2031 | 1 | 0,2149  |
| ARHGAP27 | 4878  | -0,1068 | 4677  | -0,0577 | 1317 | -0,3367 | 1480 | 1 | -0,2299 | 9810  | 1 | 0,0490  | 1397 | 1 | 0,2789  |
| GSTM3    | 5172  | -0,1017 | 1552  | -0,1213 | 1370 | -0,3302 | 1494 | 1 | -0,2285 | 15312 | 1 | -0,0196 | 2103 | 1 | 0,2089  |
| C1orf115 | 2163  | -0,1877 | 3265  | -0,0774 | 948  | -0,4157 | 1505 | 1 | -0,2280 | 5202  | 1 | 0,1103  | 1050 | 1 | 0,3383  |
| SLC39A11 | 10251 | -0,0447 | 2473  | -0,0935 | 1847 | -0,2719 | 1517 | 1 | -0,2272 | 9840  | 1 | -0,0488 | 2643 | 1 | 0,1784  |
| SSBP3    | 219   | 0,6246  | 2721  | 0,0876  | 190  | 0,8513  | 1530 | 1 | 0,2267  | 373   | 1 | -0,5370 | 187  | 1 | -0,7637 |
| COL5A1   | 73    | 0,8317  | 4229  | 0,0630  | 93   | 1,0577  | 1544 | 1 | 0,2259  | 146   | 1 | -0,7687 | 74   | 1 | -0,9946 |
| BLVRB    | 3290  | -0,1438 | 9750  | -0,0212 | 1154 | -0,3692 | 1552 | 1 | -0,2253 | 4621  | 1 | 0,1227  | 993  | 1 | 0,3480  |
| SLFNL1   | 1062  | 0,2906  | 9195  | 0,0235  | 630  | 0,5157  | 1555 | 1 | 0,2251  | 1465  | 1 | -0,2671 | 532  | 1 | -0,4922 |
| CAV2     | 1283  | -0,2594 | 2466  | -0,0937 | 718  | -0,4837 | 1572 | 1 | -0,2243 | 3171  | 1 | 0,1657  | 803  | 1 | 0,3901  |
| MAMLD1   | 6028  | 0,0886  | 1159  | 0,1405  | 1484 | 0,3127  | 1578 | 1 | 0,2240  | 9478  | 1 | 0,0518  | 2767 | 1 | -0,1722 |
| CASP4    | 3182  | -0,1471 | 1562  | -0,1207 | 1147 | -0,3701 | 1590 | 1 | -0,2230 | 13568 | 1 | 0,0264  | 1647 | 1 | 0,2494  |
| DRD1     | 10522 | -0,0428 | 2763  | -0,0866 | 1917 | -0,2655 | 1593 | 1 | -0,2228 | 10443 | 1 | -0,0438 | 2626 | 1 | 0,1789  |

|          |       |         |       |         |      |         |      |   |         |       |   |         |        |   |         |
|----------|-------|---------|-------|---------|------|---------|------|---|---------|-------|---|---------|--------|---|---------|
| SNAI2    | 2948  | 0,1547  | 3313  | 0,0767  | 1103 | 0,3773  | 1595 | 1 | 0,2226  | 7122  | 1 | -0,0780 | 1254   | 1 | -0,3006 |
| PADI2    | 1284  | -0,2594 | 727   | -0,1711 | 726  | -0,4818 | 1600 | 1 | -0,2225 | 6446  | 1 | 0,0882  | 1191   | 1 | 0,3107  |
| AK3P5    | 12666 | 0,0303  | 12824 | 0,0118  | 2066 | 0,2526  | 1607 | 1 | 0,2223  | 15684 | 1 | -0,0186 | 1731   | 1 | -0,2408 |
| PGPEP1   | 7101  | -0,0741 | 5269  | -0,0515 | 1629 | -0,2962 | 1614 | 1 | -0,2221 | 14464 | 1 | 0,0226  | 1692   | 1 | 0,2447  |
| PDGFRL   | 1065  | -0,2901 | 1098  | -0,1434 | 639  | -0,5119 | 1621 | 1 | -0,2218 | 3736  | 1 | 0,1467  | 904    | 1 | 0,3685  |
| DFNA5    | 7181  | 0,0733  | 717   | 0,1727  | 1643 | 0,2945  | 1626 | 1 | 0,2212  | 5764  | 1 | 0,0994  | 4328   | 1 | -0,1218 |
| BCL3     | 1981  | -0,1969 | 4481  | -0,0600 | 937  | -0,4181 | 1629 | 1 | -0,2211 | 4067  | 1 | 0,1369  | 951    | 1 | 0,3580  |
| TMEM178B | 7414  | -0,0709 | 1885  | -0,1096 | 1668 | -0,2918 | 1631 | 1 | -0,2209 | 11148 | 1 | -0,0387 | 2560,5 | 1 | 0,1822  |
| LRIG3    | 1234  | 0,2653  | 6938  | 0,0371  | 707  | 0,4860  | 1636 | 1 | 0,2207  | 1923  | 1 | -0,2282 | 636    | 1 | -0,4489 |
| FBXO6    | 7043  | -0,0748 | 4535  | -0,0595 | 1640 | -0,2947 | 1644 | 1 | -0,2199 | 17043 | 1 | 0,0153  | 1800   | 1 | 0,2352  |
| TMC6     | 985   | -0,3031 | 889   | -0,1573 | 610  | -0,5219 | 1660 | 1 | -0,2188 | 3761  | 1 | 0,1458  | 919    | 1 | 0,3646  |
| TLCD1    | 1820  | -0,2090 | 6269  | -0,0425 | 898  | -0,4275 | 1666 | 1 | -0,2185 | 3148  | 1 | 0,1666  | 826    | 1 | 0,3851  |
| URB1     | 703   | 0,3649  | 5921  | 0,0454  | 479  | 0,5833  | 1669 | 1 | 0,2184  | 1043  | 1 | -0,3195 | 448    | 1 | -0,5379 |
| UNC93B1  | 798   | -0,3435 | 356   | -0,2269 | 516  | -0,5613 | 1677 | 1 | -0,2178 | 4899  | 1 | 0,1166  | 1061   | 1 | 0,3344  |
| PPM1H    | 726   | -0,3593 | 19310 | -0,0042 | 488  | -0,5767 | 1683 | 1 | -0,2173 | 862   | 1 | 0,3551  | 392    | 1 | 0,5725  |
| NHS      | 382   | 0,4914  | 806   | 0,1639  | 305  | 0,7087  | 1686 | 1 | 0,2172  | 1008  | 1 | -0,3275 | 437    | 1 | -0,5448 |
| ACSS2    | 2851  | -0,1580 | 706   | -0,1734 | 1114 | -0,3746 | 1697 | 1 | -0,2166 | 17034 | 1 | -0,0153 | 2221   | 1 | 0,2012  |
| BIN1     | 69    | -0,8431 | 424   | -0,2135 | 90   | -1,0597 | 1698 | 1 | -0,2166 | 240   | 1 | 0,6296  | 135    | 1 | 0,8462  |
| RAB3D    | 1434  | -0,2446 | 2899  | -0,0843 | 776  | -0,4611 | 1700 | 1 | -0,2165 | 3318  | 1 | 0,1603  | 860    | 1 | 0,3768  |
| MCU      | 1239  | -0,2647 | 753   | -0,1681 | 729  | -0,4809 | 1708 | 1 | -0,2162 | 5938  | 1 | 0,0965  | 1174   | 1 | 0,3127  |
| SAMD4A   | 12411 | 0,0319  | 291   | 0,2462  | 2131 | 0,2479  | 1711 | 1 | 0,2160  | 2144  | 1 | 0,2143  | 28485  | 1 | -0,0017 |
| PIK3C2B  | 1404  | -0,2476 | 6383  | -0,0416 | 771  | -0,4631 | 1721 | 1 | -0,2155 | 2285  | 1 | 0,2060  | 717    | 1 | 0,4215  |
| LIMS1    | 602   | 0,3954  | 685   | 0,1756  | 426  | 0,6108  | 1722 | 1 | 0,2154  | 2046  | 1 | -0,2197 | 670    | 1 | -0,4352 |
| SPTSSA   | 7613  | -0,0688 | 632   | -0,1817 | 1749 | -0,2836 | 1733 | 1 | -0,2148 | 5094  | 1 | -0,1129 | 5334   | 1 | 0,1018  |
| HMGCS1   | 5879  | -0,0910 | 118   | -0,3540 | 1544 | -0,3055 | 1740 | 1 | -0,2145 | 1515  | 1 | -0,2630 | 9788   | 1 | -0,0485 |
| CEP170   | 840   | 0,3345  | 19246 | 0,0043  | 555  | 0,5483  | 1755 | 1 | 0,2139  | 990   | 1 | -0,3302 | 440    | 1 | -0,5440 |
| KMT2C    | 5795  | 0,0921  | 828   | 0,1624  | 1553 | 0,3049  | 1779 | 1 | 0,2129  | 7727  | 1 | 0,0703  | 3554   | 1 | -0,1425 |
| CTGF     | 10    | 1,4510  | 1554  | 0,1213  | 18   | 1,6637  | 1783 | 1 | 0,2127  | 20    | 1 | -1,3297 | 12     | 1 | -1,5425 |
| FLOT2    | 3507  | -0,1381 | 6063  | -0,0442 | 1236 | -0,3507 | 1784 | 1 | -0,2126 | 6099  | 1 | 0,0939  | 1215   | 1 | 0,3065  |
| ABCG2    | 859   | -0,3299 | 1421  | -0,1273 | 572  | -0,5420 | 1793 | 1 | -0,2120 | 2347  | 1 | 0,2026  | 733    | 1 | 0,4147  |
| KCNK1    | 2046  | -0,1930 | 778   | -0,1658 | 996  | -0,4050 | 1794 | 1 | -0,2120 | 13353 | 1 | 0,0272  | 1749   | 1 | 0,2392  |
| G6PD     | 833   | -0,3372 | 4546  | -0,0594 | 551  | -0,5490 | 1798 | 1 | -0,2118 | 1372  | 1 | 0,2779  | 539    | 1 | 0,4896  |
| RBM47    | 642   | -0,3834 | 2347  | -0,0966 | 454  | -0,5951 | 1799 | 1 | -0,2117 | 1287  | 1 | 0,2867  | 518    | 1 | 0,4985  |



|               |       |         |       |         |      |         |      |   |         |       |   |         |       |   |         |
|---------------|-------|---------|-------|---------|------|---------|------|---|---------|-------|---|---------|-------|---|---------|
| ITGB8         | 946   | -0,3087 | 538   | -0,1946 | 620  | -0,5193 | 1809 | 1 | -0,2107 | 5035  | 1 | 0,1141  | 1105  | 1 | 0,3247  |
| NCOA7         | 120   | -0,7438 | 338   | -0,2329 | 136  | -0,9540 | 1815 | 1 | -0,2102 | 414   | 1 | 0,5109  | 226   | 1 | 0,7211  |
| TJP2          | 894   | -0,3221 | 4579  | -0,0589 | 592  | -0,5319 | 1821 | 1 | -0,2099 | 1514  | 1 | 0,2632  | 568   | 1 | 0,4731  |
| SMAD7         | 870   | 0,3270  | 10860 | 0,0170  | 583  | 0,5366  | 1826 | 1 | 0,2096  | 1114  | 1 | -0,3100 | 484   | 1 | -0,5196 |
| PSMB3         | 20056 | -0,0100 | 157   | -0,3158 | 2562 | -0,2189 | 1836 | 1 | -0,2089 | 1136  | 1 | -0,3058 | 5606  | 1 | -0,0969 |
| ADAM12        | 786   | 0,3446  | 1369  | 0,1296  | 539  | 0,5535  | 1837 | 1 | 0,2089  | 2128  | 1 | -0,2150 | 708   | 1 | -0,4239 |
| ZC4H2         | 8802  | 0,0563  | 14420 | 0,0091  | 1922 | 0,2649  | 1841 | 1 | 0,2087  | 10020 | 1 | -0,0472 | 1588  | 1 | -0,2558 |
| IL32          | 5436  | 0,0975  | 1090  | 0,1438  | 1551 | 0,3051  | 1858 | 1 | 0,2076  | 10103 | 1 | 0,0464  | 3013  | 1 | -0,1613 |
| MINK1         | 12262 | -0,0327 | 1025  | -0,1475 | 2248 | -0,2398 | 1866 | 1 | -0,2072 | 5002  | 1 | -0,1148 | 5910  | 1 | 0,0924  |
| PCNX          | 717   | 0,3607  | 5791  | 0,0467  | 509  | 0,5678  | 1867 | 1 | 0,2072  | 1081  | 1 | -0,3140 | 479   | 1 | -0,5212 |
| IFI44         | 9612  | 0,0493  | 9491  | 0,0223  | 2019 | 0,2563  | 1870 | 1 | 0,2071  | 13418 | 1 | -0,0269 | 1821  | 1 | -0,2340 |
| MED15         | 763   | 0,3499  | 3754  | 0,0701  | 527  | 0,5570  | 1871 | 1 | 0,2070  | 1349  | 1 | -0,2798 | 549   | 1 | -0,4869 |
| RAET1E        | 1151  | 0,2765  | 6345  | 0,0418  | 721  | 0,4835  | 1872 | 1 | 0,2070  | 1828  | 1 | -0,2347 | 655   | 1 | -0,4417 |
| COA3          | 3759  | -0,1314 | 212   | -0,2764 | 1310 | -0,3375 | 1890 | 1 | -0,2061 | 3794  | 1 | -0,1449 | 8335  | 1 | 0,0612  |
| RAB13         | 25392 | -0,0053 | 7601  | -0,0324 | 2690 | -0,2113 | 1893 | 1 | -0,2060 | 13393 | 1 | -0,0271 | 2627  | 1 | 0,1789  |
| RPL19         | 9800  | -0,0481 | 262   | -0,2570 | 2052 | -0,2539 | 1894 | 1 | -0,2058 | 2248  | 1 | -0,2089 | 26171 | 1 | -0,0031 |
| RBMS3         | 1052  | 0,2913  | 413   | 0,2153  | 674  | 0,4968  | 1902 | 1 | 0,2055  | 7256  | 1 | -0,0760 | 1383  | 1 | -0,2815 |
| TM7SF2        | 10104 | -0,0459 | 2969  | -0,0830 | 2083 | -0,2513 | 1905 | 1 | -0,2054 | 11377 | 1 | -0,0371 | 2853  | 1 | 0,1682  |
| CUL9          | 3414  | -0,1406 | 2422  | -0,0949 | 1265 | -0,3457 | 1908 | 1 | -0,2051 | 10202 | 1 | 0,0457  | 1631  | 1 | 0,2508  |
| FERMT2        | 342   | 0,5214  | 751   | 0,1682  | 283  | 0,7263  | 1909 | 1 | 0,2049  | 868   | 1 | -0,3532 | 420   | 1 | -0,5581 |
| CHPF2         | 1522  | 0,2353  | 1581  | 0,1203  | 855  | 0,4400  | 1912 | 1 | 0,2047  | 4991  | 1 | -0,1150 | 1133  | 1 | -0,3197 |
| FAM64A        | 914   | -0,3173 | 1572  | -0,1205 | 612  | -0,5215 | 1919 | 1 | -0,2041 | 2448  | 1 | 0,1968  | 772   | 1 | 0,4009  |
| SSH3          | 7035  | -0,0748 | 2168  | -0,1014 | 1792 | -0,2785 | 1928 | 1 | -0,2037 | 13500 | 1 | -0,0266 | 2675  | 1 | 0,1771  |
| SLC16A1       | 4354  | 0,1172  | 1258  | 0,1347  | 1439 | 0,3202  | 1944 | 1 | 0,2030  | 16399 | 1 | 0,0175  | 2497  | 1 | -0,1855 |
| ZEB1          | 1408  | 0,2472  | 4075  | 0,0653  | 819  | 0,4502  | 1946 | 1 | 0,2030  | 2770  | 1 | -0,1820 | 828   | 1 | -0,3849 |
| EML2          | 3237  | -0,1452 | 4923  | -0,0551 | 1249 | -0,3482 | 1951 | 1 | -0,2029 | 6334  | 1 | 0,0901  | 1298  | 1 | 0,2930  |
| NOG           | 1272  | 0,2612  | 25327 | 0,0019  | 768  | 0,4636  | 1959 | 1 | 0,2025  | 1548  | 1 | -0,2593 | 597   | 1 | -0,4618 |
| NT5C3B        | 4971  | -0,1051 | 414   | -0,2148 | 1522 | -0,3075 | 1960 | 1 | -0,2024 | 5232  | 1 | -0,1097 | 5885  | 1 | 0,0927  |
| RAB15         | 1829  | -0,2083 | 243   | -0,2640 | 980  | -0,4100 | 1983 | 1 | -0,2016 | 9056  | 1 | -0,0557 | 3435  | 1 | 0,1460  |
| THBD          | 1200  | 0,2700  | 1822  | 0,1113  | 750  | 0,4704  | 2017 | 1 | 0,2003  | 3364  | 1 | -0,1587 | 948   | 1 | -0,3591 |
| KCNA7         | 1470  | 0,2408  | 27142 | 0,0006  | 851  | 0,4410  | 2021 | 1 | 0,2002  | 1763  | 1 | -0,2402 | 657   | 1 | -0,4404 |
| RP11-806O11.1 | 5811  | -0,0918 | 2333  | -0,0970 | 1667 | -0,2918 | 2031 | 1 | -0,2000 | 24159 | 1 | -0,0052 | 2321  | 1 | 0,1948  |
| CHST11        | 537   | 0,4188  | 17153 | 0,0058  | 420  | 0,6173  | 2063 | 1 | 0,1985  | 654   | 1 | -0,4129 | 331   | 1 | -0,6115 |

|               |       |         |       |         |      |         |      |   |         |       |   |         |      |   |         |
|---------------|-------|---------|-------|---------|------|---------|------|---|---------|-------|---|---------|------|---|---------|
| FCHO1         | 28271 | -0,0002 | 1294  | -0,1329 | 2922 | -0,1987 | 2064 | 1 | -0,1985 | 4214  | 1 | -0,1328 | 7889 | 1 | 0,0657  |
| IRS2          | 619   | -0,3903 | 924   | -0,1547 | 473  | -0,5886 | 2070 | 1 | -0,1982 | 1815  | 1 | 0,2357  | 675  | 1 | 0,4339  |
| PPFIBP2       | 93    | -0,7945 | 382   | -0,2212 | 117  | -0,9919 | 2089 | 1 | -0,1974 | 314   | 1 | 0,5733  | 184  | 1 | 0,7707  |
| OSBPL8        | 728   | 0,3590  | 1661  | 0,1170  | 530  | 0,5563  | 2092 | 1 | 0,1973  | 1743  | 1 | -0,2421 | 660  | 1 | -0,4393 |
| SHROOM2       | 975   | 0,3040  | 7218  | 0,0350  | 658  | 0,5009  | 2096 | 1 | 0,1968  | 1449  | 1 | -0,2691 | 587  | 1 | -0,4659 |
| ARHGAP24      | 3398  | -0,1411 | 1829  | -0,1111 | 1307 | -0,3377 | 2100 | 1 | -0,1966 | 12710 | 1 | 0,0300  | 1907 | 1 | 0,2266  |
| SLC35F2       | 1479  | 0,2393  | 4220  | 0,0631  | 865  | 0,4358  | 2105 | 1 | 0,1964  | 2883  | 1 | -0,1762 | 879  | 1 | -0,3727 |
| CLIC4         | 1501  | 0,2372  | 641   | 0,1814  | 875  | 0,4334  | 2110 | 1 | 0,1962  | 9045  | 1 | -0,0558 | 1616 | 1 | -0,2520 |
| STEAP3        | 595   | 0,3972  | 2061  | 0,1042  | 460  | 0,5931  | 2119 | 1 | 0,1959  | 1225  | 1 | -0,2930 | 541  | 1 | -0,4889 |
| CHD5          | 740   | 0,3566  | 1583  | 0,1202  | 541  | 0,5522  | 2127 | 1 | 0,1956  | 1809  | 1 | -0,2363 | 684  | 1 | -0,4320 |
| NCR3LG1       | 3362  | 0,1425  | 2469  | 0,0936  | 1306 | 0,3378  | 2133 | 1 | 0,1953  | 9828  | 1 | -0,0489 | 1698 | 1 | -0,2443 |
| ALDH3A2       | 609   | -0,3937 | 815   | -0,1631 | 471  | -0,5890 | 2139 | 1 | -0,1952 | 1885  | 1 | 0,2307  | 698  | 1 | 0,4259  |
| CHD7          | 3629  | 0,1346  | 2384  | 0,0956  | 1371 | 0,3298  | 2140 | 1 | 0,1951  | 11085 | 1 | -0,0391 | 1815 | 1 | -0,2342 |
| LMTK3         | 2246  | -0,1834 | 1845  | -0,1107 | 1096 | -0,3785 | 2144 | 1 | -0,1951 | 7520  | 1 | 0,0728  | 1489 | 1 | 0,2678  |
| CTD-2267D19.3 | 9122  | -0,0535 | 2313  | -0,0975 | 2128 | -0,2484 | 2145 | 1 | -0,1949 | 10424 | 1 | -0,0439 | 3294 | 1 | 0,1510  |
| MEX3B         | 425   | 0,4708  | 3036  | 0,0818  | 349  | 0,6656  | 2147 | 1 | 0,1948  | 735   | 1 | -0,3890 | 368  | 1 | -0,5838 |
| COBL          | 1321  | -0,2558 | 3952  | -0,0669 | 820  | -0,4501 | 2159 | 1 | -0,1943 | 2603  | 1 | 0,1890  | 832  | 1 | 0,3833  |
| SPATA17       | 26888 | -0,0024 | 5861  | -0,0460 | 2987 | -0,1958 | 2179 | 1 | -0,1934 | 10466 | 1 | -0,0436 | 3314 | 1 | 0,1499  |
| GALNT18       | 701   | 0,3652  | 860   | 0,1599  | 526  | 0,5580  | 2192 | 1 | 0,1928  | 2301  | 1 | -0,2053 | 777  | 1 | -0,3981 |
| MPP4          | 12483 | 0,0313  | 8476  | 0,0273  | 2476 | 0,2236  | 2204 | 1 | 0,1923  | 25890 | 1 | -0,0040 | 2289 | 1 | -0,1963 |
| PHF17         | 1337  | 0,2542  | 782   | 0,1655  | 838  | 0,4464  | 2208 | 1 | 0,1921  | 6418  | 1 | -0,0887 | 1388 | 1 | -0,2808 |
| SYNGR2        | 915   | -0,3172 | 96    | -0,3789 | 645  | -0,5092 | 2213 | 1 | -0,1920 | 8505  | 1 | -0,0617 | 3975 | 1 | 0,1303  |
| CPNE4         | 3810  | -0,1303 | 1501  | -0,1239 | 1424 | -0,3220 | 2219 | 1 | -0,1917 | 23243 | 1 | 0,0064  | 2263 | 1 | 0,1981  |
| EVA1A         | 594   | 0,3977  | 1722  | 0,1147  | 470  | 0,5891  | 2224 | 1 | 0,1914  | 1320  | 1 | -0,2829 | 565  | 1 | -0,4744 |
| SLC9C1        | 2350  | 0,1782  | 25518 | 0,0018  | 1151 | 0,3696  | 2228 | 1 | 0,1914  | 2879  | 1 | -0,1764 | 910  | 1 | -0,3678 |
| RP4-794H19.1  | 1436  | 0,2445  | 18449 | 0,0050  | 867  | 0,4357  | 2233 | 1 | 0,1912  | 1775  | 1 | -0,2394 | 689  | 1 | -0,4306 |
| PEA15         | 293   | 0,5532  | 617   | 0,1833  | 271  | 0,7441  | 2237 | 1 | 0,1909  | 799   | 1 | -0,3699 | 417  | 1 | -0,5608 |
| PLEKHH3       | 2961  | -0,1543 | 4555  | -0,0592 | 1273 | -0,3448 | 2247 | 1 | -0,1905 | 6029  | 1 | 0,0951  | 1346 | 1 | 0,2856  |
| SH3KBP1       | 150   | 0,7051  | 1210  | 0,1377  | 165  | 0,8950  | 2263 | 1 | 0,1900  | 321   | 1 | -0,5674 | 193  | 1 | -0,7574 |
| C18orf25      | 2107  | 0,1904  | 10762 | 0,0174  | 1091 | 0,3795  | 2276 | 1 | 0,1892  | 2968  | 1 | -0,1730 | 931  | 1 | -0,3621 |
| PYCARD        | 27981 | -0,0011 | 3941  | -0,0670 | 3149 | -0,1890 | 2307 | 1 | -0,1879 | 8117  | 1 | -0,0659 | 4325 | 1 | 0,1220  |
| QPCT          | 249   | 0,5883  | 721   | 0,1718  | 242  | 0,7761  | 2308 | 1 | 0,1878  | 642   | 1 | -0,4165 | 341  | 1 | -0,6043 |
| PLEKHO1       | 1742  | 0,2152  | 1918  | 0,1088  | 1000 | 0,4030  | 2313 | 1 | 0,1878  | 5385  | 1 | -0,1064 | 1293 | 1 | -0,2941 |

|               |       |         |       |         |      |         |      |   |         |       |   |         |       |   |         |
|---------------|-------|---------|-------|---------|------|---------|------|---|---------|-------|---|---------|-------|---|---------|
| RPH3AL        | 3451  | -0,1395 | 716   | -0,1728 | 1391 | -0,3270 | 2322 | 1 | -0,1874 | 12082 | 1 | -0,0332 | 3191  | 1 | 0,1542  |
| CMBL          | 3309  | -0,1435 | 4863  | -0,0558 | 1362 | -0,3309 | 2323 | 1 | -0,1874 | 6481  | 1 | 0,0877  | 1419  | 1 | 0,2751  |
| LTBR          | 993   | -0,3016 | 4034  | -0,0657 | 700  | -0,4883 | 2337 | 1 | -0,1867 | 1812  | 1 | 0,2358  | 712   | 1 | 0,4226  |
| SH2D3A        | 2266  | -0,1822 | 11460 | -0,0151 | 1155 | -0,3687 | 2339 | 1 | -0,1865 | 3135  | 1 | 0,1672  | 969   | 1 | 0,3537  |
| WDR91         | 3135  | 0,1489  | 9993  | 0,0201  | 1330 | 0,3348  | 2346 | 1 | 0,1859  | 4359  | 1 | -0,1288 | 1158  | 1 | -0,3147 |
| GSTA4         | 10863 | -0,0404 | 11380 | -0,0154 | 2430 | -0,2261 | 2350 | 1 | -0,1857 | 13865 | 1 | 0,0251  | 2078  | 1 | 0,2108  |
| LGR6          | 2833  | -0,1587 | 2048  | -0,1045 | 1279 | -0,3443 | 2351 | 1 | -0,1856 | 9236  | 1 | 0,0541  | 1741  | 1 | 0,2397  |
| FAM102B       | 1421  | 0,2461  | 5105  | 0,0531  | 887  | 0,4315  | 2360 | 1 | 0,1853  | 2527  | 1 | -0,1930 | 854   | 1 | -0,3783 |
| SLC16A2       | 579   | 0,4047  | 232   | 0,2690  | 468  | 0,5900  | 2361 | 1 | 0,1853  | 4110  | 1 | -0,1356 | 1122  | 1 | -0,3209 |
| ZNF462        | 5015  | 0,1042  | 216   | 0,2753  | 1693 | 0,2894  | 2363 | 1 | 0,1853  | 3025  | 1 | 0,1711  | 17621 | 1 | -0,0142 |
| CTD-2207P18.2 | 6462  | 0,0824  | 8390  | 0,0277  | 1902 | 0,2669  | 2387 | 1 | 0,1846  | 9163  | 1 | -0,0546 | 1747  | 1 | -0,2392 |
| OSBP2         | 600   | -0,3958 | 9044  | -0,0243 | 484  | -0,5795 | 2403 | 1 | -0,1837 | 790   | 1 | 0,3715  | 425   | 1 | 0,5552  |
| DKK1          | 431   | -0,4677 | 130   | -0,3399 | 369  | -0,6507 | 2415 | 1 | -0,1829 | 4394  | 1 | 0,1279  | 1190  | 1 | 0,3108  |
| RDH10         | 621   | -0,3889 | 147   | -0,3228 | 499  | -0,5718 | 2416 | 1 | -0,1828 | 8092  | 1 | 0,0662  | 1649  | 1 | 0,2490  |
| TACO1         | 2831  | -0,1588 | 602   | -0,1853 | 1300 | -0,3388 | 2473 | 1 | -0,1800 | 13557 | 1 | -0,0264 | 3209  | 1 | 0,1536  |
| CYB5B         | 841   | -0,3342 | 119   | -0,3534 | 634  | -0,5141 | 2475 | 1 | -0,1799 | 15518 | 1 | -0,0192 | 3034  | 1 | 0,1607  |
| EPHB2         | 671   | 0,3748  | 2944  | 0,0835  | 534  | 0,5545  | 2479 | 1 | 0,1797  | 1241  | 1 | -0,2913 | 571   | 1 | -0,4710 |
| DBP           | 2302  | -0,1803 | 3715  | -0,0706 | 1197 | -0,3596 | 2489 | 1 | -0,1794 | 5235  | 1 | 0,1097  | 1319  | 1 | 0,2890  |
| CREB3L2       | 1534  | 0,2339  | 181   | 0,2994  | 963  | 0,4130  | 2501 | 1 | 0,1791  | 8147  | 1 | 0,0656  | 4724  | 1 | -0,1136 |
| ABCC1         | 533   | -0,4203 | 5018  | -0,0542 | 443  | -0,5991 | 2511 | 1 | -0,1788 | 810   | 1 | 0,3661  | 436   | 1 | 0,5449  |
| CCDC50        | 779   | 0,3458  | 707   | 0,1733  | 605  | 0,5246  | 2512 | 1 | 0,1788  | 2978  | 1 | -0,1725 | 979   | 1 | -0,3513 |
| SSR3          | 969   | 0,3049  | 2220  | 0,1000  | 722  | 0,4833  | 2521 | 1 | 0,1784  | 2312  | 1 | -0,2049 | 831   | 1 | -0,3833 |
| AMOTL1        | 14541 | -0,0225 | 191   | -0,2924 | 2892 | -0,2007 | 2527 | 1 | -0,1782 | 1445  | 1 | -0,2699 | 5949  | 1 | -0,0916 |
| GLP2R         | 727   | -0,3592 | 1268  | -0,1341 | 585  | -0,5362 | 2553 | 1 | -0,1769 | 1973  | 1 | 0,2251  | 767   | 1 | 0,4020  |
| GCSAM         | 655   | 0,3800  | 25633 | 0,0016  | 528  | 0,5569  | 2554 | 1 | 0,1769  | 766   | 1 | -0,3784 | 424   | 1 | -0,5553 |
| TMEM165       | 1599  | 0,2262  | 2889  | 0,0845  | 1002 | 0,4027  | 2559 | 1 | 0,1765  | 3904  | 1 | -0,1417 | 1143  | 1 | -0,3182 |
| EVPL          | 1344  | -0,2536 | 2938  | -0,0835 | 891  | -0,4300 | 2564 | 1 | -0,1764 | 3057  | 1 | 0,1700  | 1002  | 1 | 0,3465  |
| PLEKHH2       | 7653  | -0,0683 | 1972  | -0,1068 | 2173 | -0,2447 | 2566 | 1 | -0,1764 | 11182 | 1 | -0,0385 | 3713  | 1 | 0,1379  |
| IFNLR1        | 9796  | -0,0481 | 3856  | -0,0686 | 2467 | -0,2244 | 2571 | 1 | -0,1762 | 15118 | 1 | -0,0204 | 3141  | 1 | 0,1558  |
| RASSF9        | 5746  | -0,0927 | 2202  | -0,1005 | 1883 | -0,2689 | 2572 | 1 | -0,1761 | 22068 | 1 | -0,0078 | 2851  | 1 | 0,1684  |
| HIVEP2        | 303   | 0,5486  | 3155  | 0,0796  | 284  | 0,7247  | 2573 | 1 | 0,1761  | 498   | 1 | -0,4690 | 302   | 1 | -0,6451 |
| RAP1GAP       | 1055  | -0,2910 | 196   | -0,2875 | 760  | -0,4657 | 2605 | 1 | -0,1747 | 26712 | 1 | 0,0035  | 2649  | 1 | 0,1782  |
| PIM1          | 5037  | -0,1038 | 7496  | -0,0331 | 1794 | -0,2785 | 2608 | 1 | -0,1746 | 7706  | 1 | 0,0707  | 1682  | 1 | 0,2453  |

|            |       |         |       |         |      |         |      |   |         |         |   |         |      |   |         |
|------------|-------|---------|-------|---------|------|---------|------|---|---------|---------|---|---------|------|---|---------|
| KLF7       | 845   | 0,3332  | 10455 | 0,0185  | 647  | 0,5077  | 2612 | 1 | 0,1745  | 1075    | 1 | -0,3147 | 540  | 1 | -0,4892 |
| STON2      | 92    | 0,7955  | 14136 | 0,0097  | 126  | 0,9689  | 2646 | 1 | 0,1734  | 133     | 1 | -0,7858 | 85   | 1 | -0,9592 |
| MAMDC2     | 16252 | 0,0185  | 16535 | 0,0066  | 3093 | 0,1912  | 2664 | 1 | 0,1727  | 18741,5 | 1 | -0,0119 | 2523 | 1 | -0,1847 |
| MTHFR      | 5546  | -0,0958 | 3505  | -0,0739 | 1890 | -0,2683 | 2671 | 1 | -0,1725 | 14711   | 1 | 0,0219  | 2330 | 1 | 0,1944  |
| B4GALT1    | 891   | 0,3224  | 3000  | 0,0824  | 682  | 0,4945  | 2679 | 1 | 0,1721  | 1768    | 1 | -0,2399 | 742  | 1 | -0,4120 |
| TYRO3      | 551   | 0,4135  | 1484  | 0,1246  | 477  | 0,5855  | 2685 | 1 | 0,1720  | 1267    | 1 | -0,2888 | 599  | 1 | -0,4609 |
| PALLD      | 151   | 0,7023  | 91    | 0,3828  | 179  | 0,8736  | 2702 | 1 | 0,1713  | 1042    | 1 | -0,3195 | 535  | 1 | -0,4909 |
| LRP11      | 624   | 0,3882  | 3684  | 0,0710  | 521  | 0,5590  | 2714 | 1 | 0,1708  | 1060    | 1 | -0,3172 | 544  | 1 | -0,4880 |
| GNG4       | 444   | 0,4624  | 5233  | 0,0519  | 397  | 0,6329  | 2718 | 1 | 0,1705  | 657     | 1 | -0,4105 | 374  | 1 | -0,5810 |
| PMEPA1     | 316   | 0,5382  | 349   | 0,2292  | 306  | 0,7086  | 2719 | 1 | 0,1704  | 1123    | 1 | -0,3090 | 557  | 1 | -0,4794 |
| LAMA4      | 2432  | -0,1743 | 1955  | -0,1075 | 1278 | -0,3443 | 2735 | 1 | -0,1700 | 8047    | 1 | 0,0668  | 1778 | 1 | 0,2367  |
| EPPK1      | 26283 | 0,0033  | 6667  | 0,0393  | 3558 | 0,1730  | 2750 | 1 | 0,1697  | 11575   | 1 | 0,0360  | 3862 | 1 | -0,1336 |
| BCHE       | 17264 | -0,0151 | 3898  | -0,0677 | 3253 | -0,1843 | 2763 | 1 | -0,1693 | 9381    | 1 | -0,0527 | 4567 | 1 | 0,1166  |
| TPM1       | 87    | 0,7980  | 295   | 0,2455  | 129  | 0,9672  | 2764 | 1 | 0,1692  | 352     | 1 | -0,5525 | 225  | 1 | -0,7217 |
| CAV1       | 283   | -0,5611 | 3412  | -0,0752 | 280  | -0,7303 | 2767 | 1 | -0,1692 | 466     | 1 | 0,4859  | 292  | 1 | 0,6551  |
| STARD13    | 1243  | 0,2645  | 5772  | 0,0468  | 877  | 0,4329  | 2789 | 1 | 0,1684  | 2080    | 1 | -0,2177 | 822  | 1 | -0,3861 |
| AC017002.2 | 7213  | 0,0729  | 7406  | 0,0337  | 2230 | 0,2412  | 2793 | 1 | 0,1684  | 11065   | 1 | -0,0391 | 2121 | 1 | -0,2075 |
| ACBD4      | 10017 | -0,0465 | 1974  | -0,1068 | 2621 | -0,2148 | 2795 | 1 | -0,1683 | 8636    | 1 | -0,0603 | 4994 | 1 | 0,1081  |
| AC106801.1 | 7851  | 0,0660  | 12672 | 0,0120  | 2333 | 0,2338  | 2811 | 1 | 0,1678  | 9255,5  | 1 | -0,0540 | 1956 | 1 | -0,2218 |
| TXNDC17    | 1852  | -0,2067 | 419   | -0,2145 | 1116 | -0,3741 | 2821 | 1 | -0,1675 | 22053   | 1 | -0,0079 | 3065 | 1 | 0,1596  |
| AC006262.6 | 705   | 0,3641  | 8320  | 0,0282  | 595  | 0,5307  | 2847 | 1 | 0,1666  | 955     | 1 | -0,3359 | 509  | 1 | -0,5025 |
| AC012613.2 | 1014  | 0,2984  | 10966 | 0,0167  | 764  | 0,4643  | 2868 | 1 | 0,1660  | 1332    | 1 | -0,2816 | 639  | 1 | -0,4476 |
| LIPG       | 10235 | -0,0449 | 2541  | -0,0919 | 2709 | -0,2106 | 2877 | 1 | -0,1657 | 10038   | 1 | -0,0470 | 4466 | 1 | 0,1187  |
| JARID2     | 181   | 0,6665  | 2794  | 0,0861  | 199  | 0,8316  | 2891 | 1 | 0,1650  | 305     | 1 | -0,5805 | 207  | 1 | -0,7455 |
| VSTM4      | 117   | 0,7472  | 26435 | 0,0012  | 480  | 0,5831  | 2914 | 1 | -0,1640 | 155     | 1 | -0,7460 | 371  | 1 | -0,5819 |
| STK17B     | 1027  | 0,2952  | 4957  | 0,0549  | 781  | 0,4593  | 2915 | 1 | 0,1640  | 1761    | 1 | -0,2404 | 760  | 1 | -0,4044 |
| APOC1      | 9840  | -0,0477 | 3406  | -0,0753 | 2693 | -0,2112 | 2931 | 1 | -0,1635 | 13172   | 1 | -0,0276 | 3778 | 1 | 0,1359  |
| EGLN3      | 4858  | -0,1071 | 3488  | -0,0742 | 1865 | -0,2703 | 2944 | 1 | -0,1632 | 12120   | 1 | 0,0330  | 2293 | 1 | 0,1962  |
| ANKRD40    | 8108  | -0,0630 | 1196  | -0,1383 | 2429 | -0,2261 | 2946 | 1 | -0,1632 | 7305    | 1 | -0,0753 | 6170 | 1 | 0,0879  |
| HECTD2     | 1473  | 0,2404  | 8304  | 0,0283  | 1001 | 0,4029  | 2957 | 1 | 0,1625  | 2191    | 1 | -0,2121 | 874  | 1 | -0,3746 |
| SACS       | 1565  | 0,2312  | 1545  | 0,1215  | 1043 | 0,3933  | 2965 | 1 | 0,1621  | 5237    | 1 | -0,1096 | 1446 | 1 | -0,2718 |
| DGKI       | 15043 | 0,0213  | 19045 | 0,0044  | 3287 | 0,1832  | 2972 | 1 | 0,1619  | 16558   | 1 | -0,0168 | 2633 | 1 | -0,1787 |
| LTBP2      | 381   | 0,4920  | 8148  | 0,0291  | 367  | 0,6537  | 2985 | 1 | 0,1617  | 524     | 1 | -0,4629 | 318  | 1 | -0,6246 |



|          |       |         |       |         |      |         |        |   |         |       |   |         |       |   |         |
|----------|-------|---------|-------|---------|------|---------|--------|---|---------|-------|---|---------|-------|---|---------|
| ABLIM3   | 30    | 1,0930  | 1968  | 0,1070  | 54   | 1,2544  | 2995   | 1 | 0,1614  | 55    | 1 | -0,9860 | 45    | 1 | -1,1474 |
| LPCAT2   | 128   | 0,7290  | 976   | 0,1507  | 167  | 0,8903  | 3000   | 1 | 0,1613  | 306   | 1 | -0,5783 | 213   | 1 | -0,7396 |
| C11orf45 | 7042  | -0,0748 | 2654  | -0,0891 | 2298 | -0,2361 | 3001   | 1 | -0,1613 | 17635 | 1 | -0,0143 | 3403  | 1 | 0,1470  |
| ITGAV    | 148   | 0,7067  | 2641  | 0,0894  | 182  | 0,8674  | 3022   | 1 | 0,1607  | 261   | 1 | -0,6173 | 180   | 1 | -0,7780 |
| TFCP2L1  | 2386  | -0,1767 | 3491  | -0,0741 | 1318 | -0,3367 | 3039   | 1 | -0,1600 | 5596  | 1 | 0,1026  | 1535  | 1 | 0,2626  |
| FGF2     | 123   | 0,7390  | 527   | 0,1961  | 163  | 0,8989  | 3041   | 1 | 0,1600  | 363   | 1 | -0,5429 | 249   | 1 | -0,7028 |
| MAP2K4   | 1135  | -0,2784 | 556   | -0,1917 | 859  | -0,4384 | 3042   | 1 | -0,1600 | 6549  | 1 | 0,0868  | 1666  | 1 | 0,2467  |
| NT5C2    | 792   | -0,3439 | 2571  | -0,0912 | 654  | -0,5036 | 3051   | 1 | -0,1597 | 1621  | 1 | 0,2527  | 738   | 1 | 0,4125  |
| HOOK1    | 5827  | -0,0916 | 4813  | -0,0562 | 2080 | -0,2513 | 3052   | 1 | -0,1597 | 11686 | 1 | 0,0354  | 2313  | 1 | 0,1951  |
| CHDH     | 4154  | -0,1217 | 3518  | -0,0737 | 1769 | -0,2812 | 3060   | 1 | -0,1595 | 9936  | 1 | 0,0480  | 2120  | 1 | 0,2075  |
| TRIM69   | 3026  | -0,1524 | 8038  | -0,0297 | 1492 | -0,3116 | 3076   | 1 | -0,1592 | 4614  | 1 | 0,1227  | 1381  | 1 | 0,2819  |
| LMO7     | 507   | -0,4306 | 2123  | -0,1026 | 469  | -0,5897 | 3078   | 1 | -0,1591 | 1004  | 1 | 0,3281  | 547   | 1 | 0,4872  |
| MAP1B    | 1908  | 0,2022  | 335   | 0,2335  | 1191 | 0,3611  | 3089   | 1 | 0,1588  | 12436 | 1 | 0,0313  | 4084  | 1 | -0,1275 |
| CD38     | 659   | -0,3783 | 1748  | -0,1139 | 584  | -0,5364 | 3114   | 1 | -0,1580 | 1503  | 1 | 0,2644  | 713   | 1 | 0,4225  |
| VAMP8    | 11202 | -0,0382 | 3278  | -0,0772 | 2988 | -0,1958 | 3121   | 1 | -0,1576 | 11087 | 1 | -0,0391 | 4472  | 1 | 0,1186  |
| PPP1R13L | 393   | 0,4856  | 3386  | 0,0756  | 379  | 0,6431  | 3129   | 1 | 0,1574  | 659   | 1 | -0,4100 | 401   | 1 | -0,5675 |
| E2F7     | 924   | 0,3151  | 6604  | 0,0398  | 745  | 0,4723  | 3130   | 1 | 0,1572  | 1392  | 1 | -0,2752 | 681   | 1 | -0,4324 |
| SP140L   | 10648 | 0,0420  | 895   | 0,1570  | 2923 | 0,1986  | 3145   | 1 | 0,1567  | 4985  | 1 | 0,1151  | 10732 | 1 | -0,0416 |
| NUAK1    | 323   | 0,5303  | 2039  | 0,1048  | 329  | 0,6870  | 3146   | 1 | 0,1567  | 619   | 1 | -0,4255 | 370   | 1 | -0,5822 |
| ATP10D   | 2414  | 0,1753  | 2781  | 0,0863  | 1364 | 0,3308  | 3180   | 1 | 0,1556  | 6399  | 1 | -0,0890 | 1695  | 1 | -0,2445 |
| TRIM47   | 2810  | -0,1598 | 2302  | -0,0977 | 1464 | -0,3150 | 3191   | 1 | -0,1553 | 8475  | 1 | 0,0621  | 2011  | 1 | 0,2174  |
| FAH      | 1667  | -0,2208 | 3458  | -0,0746 | 1110 | -0,3758 | 3206,5 | 1 | -0,1549 | 3746  | 1 | 0,1462  | 1249  | 1 | 0,3012  |
| RHPN1    | 1668  | -0,2208 | 1428  | -0,1270 | 1111 | -0,3758 | 3206,5 | 1 | -0,1549 | 6102  | 1 | 0,0938  | 1650  | 1 | 0,2487  |
| CLSTN1   | 345   | 0,5186  | 3297  | 0,0770  | 342  | 0,6731  | 3221   | 1 | 0,1545  | 574   | 1 | -0,4416 | 352   | 1 | -0,5961 |
| CA11     | 5961  | -0,0898 | 9097  | -0,0240 | 2181 | -0,2439 | 3240   | 1 | -0,1541 | 8124  | 1 | 0,0658  | 1979  | 1 | 0,2199  |
| CTTNBP2  | 2793  | 0,1606  | 6794  | 0,0382  | 1481 | 0,3132  | 3294   | 1 | 0,1526  | 4637  | 1 | -0,1224 | 1422  | 1 | -0,2750 |
| ARHGEF37 | 5129  | -0,1022 | 3221  | -0,0783 | 2047 | -0,2543 | 3305   | 1 | -0,1521 | 14176 | 1 | 0,0239  | 2696  | 1 | 0,1759  |
| METTL16  | 2561  | -0,1697 | 259   | -0,2581 | 1426 | -0,3216 | 3309   | 1 | -0,1520 | 6436  | 1 | -0,0884 | 8087  | 1 | 0,0636  |
| PIR      | 1256  | -0,2630 | 9987  | -0,0202 | 951  | -0,4150 | 3310   | 1 | -0,1520 | 1734  | 1 | 0,2428  | 791   | 1 | 0,3948  |
| IGSF11   | 1866  | -0,2056 | 1215  | -0,1374 | 1205 | -0,3575 | 3313   | 1 | -0,1519 | 7916  | 1 | 0,0682  | 1975  | 1 | 0,2201  |
| INA      | 785   | -0,3447 | 3112  | -0,0804 | 676  | -0,4965 | 3314   | 1 | -0,1519 | 1505  | 1 | 0,2642  | 726   | 1 | 0,4161  |
| FOXA2    | 470   | -0,4456 | 14689 | -0,0086 | 448  | -0,5974 | 3315   | 1 | -0,1518 | 588   | 1 | 0,4370  | 362   | 1 | 0,5888  |
| RASGEF1A | 664   | -0,3773 | 838   | -0,1618 | 597  | -0,5288 | 3324   | 1 | -0,1515 | 2118  | 1 | 0,2156  | 912   | 1 | 0,3671  |

|             |       |         |       |         |      |         |      |   |         |         |   |         |       |   |         |
|-------------|-------|---------|-------|---------|------|---------|------|---|---------|---------|---|---------|-------|---|---------|
| MIR4435-1HG | 565   | 0,4095  | 2217  | 0,1002  | 518  | 0,5607  | 3345 | 1 | 0,1512  | 1120    | 1 | -0,3093 | 601   | 1 | -0,4605 |
| UPK3B       | 577   | -0,4054 | 1958  | -0,1072 | 531  | -0,5563 | 3360 | 1 | -0,1509 | 1184    | 1 | 0,2981  | 634   | 1 | 0,4490  |
| ZFH3        | 2455  | 0,1732  | 1619  | 0,1183  | 1415 | 0,3232  | 3390 | 1 | 0,1500  | 9141    | 1 | -0,0548 | 2162  | 1 | -0,2048 |
| SULF2       | 121   | 0,7409  | 1784  | 0,1126  | 168  | 0,8898  | 3429 | 1 | 0,1489  | 244     | 1 | -0,6284 | 181   | 1 | -0,7773 |
| ENDOD1      | 203   | 0,6397  | 3969  | 0,0667  | 692  | 0,4910  | 3437 | 1 | -0,1488 | 316     | 1 | -0,5731 | 705   | 1 | -0,4243 |
| HHIP        | 176   | 0,6707  | 20327 | 0,0033  | 207  | 0,8193  | 3444 | 1 | 0,1487  | 218     | 1 | -0,6673 | 156   | 1 | -0,8160 |
| PALMD       | 4331  | -0,1179 | 2518  | -0,0925 | 1908 | -0,2664 | 3449 | 1 | -0,1486 | 13798   | 1 | 0,0254  | 2734  | 1 | 0,1739  |
| SUSD2       | 162   | -0,6882 | 539   | -0,1944 | 198  | -0,8360 | 3475 | 1 | -0,1478 | 447     | 1 | 0,4938  | 305   | 1 | 0,6415  |
| CACHD1      | 719   | 0,3604  | 8422  | 0,0275  | 648  | 0,5075  | 3496 | 1 | 0,1470  | 978     | 1 | -0,3329 | 556   | 1 | -0,4799 |
| LIMCH1      | 9438  | 0,0507  | 318   | 0,2389  | 2943 | 0,1977  | 3498 | 1 | 0,1470  | 2628    | 1 | 0,1882  | 10798 | 1 | 0,0412  |
| OSBPL6      | 7141  | 0,0737  | 3511  | 0,0738  | 2543 | 0,2203  | 3513 | 1 | 0,1466  | 29676   | 1 | 0,0001  | 3422  | 1 | -0,1465 |
| IGFL2       | 201   | 0,6411  | 9111  | 0,0240  | 227  | 0,7875  | 3520 | 1 | 0,1464  | 262     | 1 | -0,6171 | 188   | 1 | -0,7635 |
| PNMAL1      | 1032  | -0,2942 | 2484  | -0,0933 | 854  | -0,4403 | 3541 | 1 | -0,1461 | 2379    | 1 | 0,2009  | 999   | 1 | 0,3469  |
| FDXR        | 1382  | -0,2495 | 393   | -0,2194 | 1033 | -0,3953 | 3550 | 1 | -0,1458 | 12683   | 1 | 0,0302  | 2693  | 1 | 0,1760  |
| SNAPC5      | 1409  | -0,2472 | 2311  | -0,0975 | 1045 | -0,3928 | 3557 | 1 | -0,1456 | 3625    | 1 | 0,1497  | 1288  | 1 | 0,2953  |
| ZNF117      | 7286  | 0,0722  | 5382  | 0,0505  | 2575 | 0,2178  | 3562 | 1 | 0,1455  | 14735   | 1 | -0,0218 | 2869  | 1 | -0,1673 |
| PKD1L2      | 6911  | -0,0764 | 4062  | -0,0654 | 2508 | -0,2218 | 3565 | 1 | -0,1454 | 19093   | 1 | 0,0109  | 3130  | 1 | 0,1564  |
| GLIPR2      | 745   | 0,3545  | 1587  | 0,1201  | 666  | 0,4996  | 3581 | 1 | 0,1451  | 1832    | 1 | -0,2344 | 848   | 1 | -0,3795 |
| PODXL       | 104   | 0,7666  | 2876  | 0,0846  | 158  | 0,9114  | 3597 | 1 | 0,1448  | 208     | 1 | -0,6820 | 148   | 1 | -0,8268 |
| KCNAB2      | 2962  | -0,1543 | 7938  | -0,0302 | 1594 | -0,2987 | 3605 | 1 | -0,1445 | 4557    | 1 | 0,1240  | 1481  | 1 | 0,2685  |
| CDH2        | 267   | 0,5733  | 941   | 0,1532  | 292  | 0,7176  | 3610 | 1 | 0,1443  | 632     | 1 | -0,4200 | 407   | 1 | -0,5643 |
| NGF         | 3512  | 0,1380  | 10405 | 0,0187  | 1757 | 0,2823  | 3611 | 1 | 0,1443  | 4772    | 1 | -0,1193 | 1528  | 1 | -0,2636 |
| PCDHAC2     | 1918  | -0,2017 | 1657  | -0,1171 | 1268 | -0,3452 | 3639 | 1 | -0,1436 | 6692    | 1 | 0,0846  | 1886  | 1 | 0,2282  |
| MN1         | 641   | 0,3835  | 2121  | 0,1027  | 600  | 0,5271  | 3642 | 1 | 0,1435  | 1339    | 1 | -0,2809 | 704   | 1 | -0,4244 |
| IER5        | 157   | -0,6967 | 5520  | -0,0492 | 537  | -0,5537 | 3662 | 1 | 0,1429  | 226     | 1 | 0,6475  | 506   | 1 | 0,5046  |
| DLC1        | 13389 | 0,0276  | 14009 | 0,0098  | 3633 | 0,1703  | 3671 | 1 | 0,1427  | 16181,5 | 1 | -0,0178 | 3045  | 1 | -0,1605 |
| NIPSNAP1    | 2825  | -0,1590 | 1812  | -0,1116 | 1574 | -0,3017 | 3674 | 1 | -0,1427 | 9994    | 1 | 0,0474  | 2417  | 1 | 0,1901  |
| NTF4        | 3463  | 0,1392  | 17269 | 0,0056  | 1779 | 0,2807  | 3710 | 1 | 0,1416  | 4193    | 1 | -0,1336 | 1418  | 1 | -0,2751 |
| ILDR2       | 16230 | 0,0185  | 14016 | 0,0098  | 3933 | 0,1597  | 3721 | 1 | 0,1412  | 21653,5 | 1 | -0,0087 | 3315  | 1 | -0,1498 |
| ITGB6       | 86    | 0,8014  | 3078  | 0,0810  | 141  | 0,9419  | 3747 | 1 | 0,1404  | 179     | 1 | -0,7204 | 124   | 1 | -0,8609 |
| GRAMD4      | 5135  | -0,1021 | 2119  | -0,1027 | 2208 | -0,2425 | 3751 | 1 | -0,1404 | 29173   | 1 | -0,0006 | 3641  | 1 | 0,1398  |
| GRIN2B      | 11050 | -0,0392 | 4071  | -0,0653 | 3428 | -0,1780 | 3811 | 1 | -0,1389 | 13609   | 1 | -0,0262 | 4767  | 1 | 0,1127  |
| CFD         | 1528  | -0,2346 | 1097  | -0,1434 | 1123 | -0,3734 | 3814 | 1 | -0,1388 | 6274    | 1 | 0,0912  | 1867  | 1 | 0,2300  |

|                |       |         |       |         |      |         |      |   |         |       |   |         |      |   |         |
|----------------|-------|---------|-------|---------|------|---------|------|---|---------|-------|---|---------|------|---|---------|
| BMPR2          | 172   | 0,6799  | 4541  | 0,0595  | 209  | 0,8177  | 3846 | 1 | 0,1378  | 258   | 1 | -0,6204 | 190  | 1 | -0,7582 |
| NOTCH3         | 25391 | -0,0053 | 6017  | -0,0447 | 4486 | -0,1425 | 3866 | 1 | -0,1372 | 11021 | 1 | -0,0394 | 5549 | 1 | 0,0978  |
| CCDC34         | 7301  | -0,0720 | 1102  | -0,1432 | 2739 | -0,2090 | 3878 | 1 | -0,1369 | 7663  | 1 | -0,0712 | 7882 | 1 | 0,0658  |
| MMD            | 5315  | -0,0995 | 705   | -0,1734 | 2290 | -0,2365 | 3879 | 1 | -0,1369 | 7437  | 1 | -0,0738 | 8144 | 1 | 0,0631  |
| MIR3167        | 9729  | 0,0484  | 8475  | 0,0273  | 3249 | 0,1844  | 3922 | 1 | 0,1360  | 14885 | 1 | -0,0211 | 3110 | 1 | -0,1572 |
| ZPLD1          | 10183 | 0,0454  | 16826 | 0,0066  | 3349 | 0,1808  | 3953 | 1 | 0,1354  | 11130 | 1 | -0,0388 | 2728 | 1 | -0,1742 |
| SEC24D         | 1478  | 0,2394  | 1062  | 0,1452  | 1115 | 0,3743  | 3972 | 1 | 0,1349  | 6073  | 1 | -0,0942 | 1876 | 1 | -0,2291 |
| TENM3          | 336   | 0,5234  | 237   | 0,2659  | 360  | 0,6576  | 4005 | 1 | 0,1342  | 1567  | 1 | -0,2576 | 796  | 1 | -0,3917 |
| CXCL16         | 2069  | -0,1920 | 3240  | -0,0780 | 1394 | -0,3262 | 4008 | 1 | -0,1341 | 5036  | 1 | 0,1141  | 1657 | 1 | 0,2482  |
| ENGASE         | 5092  | -0,1028 | 7467  | -0,0333 | 2289 | -0,2367 | 4018 | 1 | -0,1339 | 7805  | 1 | 0,0695  | 2182 | 1 | 0,2034  |
| BCAM           | 1293  | -0,2586 | 8284  | -0,0284 | 1046 | -0,3924 | 4025 | 1 | -0,1338 | 1891  | 1 | 0,2302  | 922  | 1 | 0,3640  |
| CES3           | 6946  | -0,0758 | 4118  | -0,0646 | 2734 | -0,2092 | 4045 | 1 | -0,1334 | 19006 | 1 | 0,0111  | 3485 | 1 | 0,1446  |
| FGF1           | 6881  | 0,0768  | 18587 | 0,0047  | 2727 | 0,2096  | 4071 | 1 | 0,1328  | 7565  | 1 | -0,0721 | 2160 | 1 | -0,2049 |
| NR4A3          | 700   | 0,3655  | 14917 | 0,0080  | 2342 | 0,2329  | 4081 | 1 | -0,1326 | 852   | 1 | -0,3574 | 1925 | 1 | -0,2249 |
| LINC00152      | 246   | 0,5911  | 2385  | 0,0955  | 286  | 0,7235  | 4085 | 1 | 0,1325  | 442   | 1 | -0,4955 | 316  | 1 | -0,6280 |
| GPR176         | 1662  | 0,2210  | 1352  | 0,1303  | 1225 | 0,3533  | 4093 | 1 | 0,1322  | 6299  | 1 | -0,0907 | 1944 | 1 | -0,2230 |
| CCDC106        | 1924  | -0,2014 | 1549  | -0,1213 | 1342 | -0,3335 | 4101 | 1 | -0,1321 | 6967  | 1 | 0,0801  | 2060 | 1 | 0,2122  |
| MALT1          | 2333  | 0,1789  | 3130  | 0,0801  | 1502 | 0,3108  | 4109 | 1 | 0,1320  | 5797  | 1 | -0,0988 | 1856 | 1 | -0,2308 |
| C17orf89       | 1586  | -0,2277 | 206   | -0,2800 | 1198 | -0,3594 | 4115 | 1 | -0,1317 | 9432  | 1 | -0,0523 | 6770 | 1 | 0,0795  |
| TRPC6          | 468   | -0,4460 | 448   | -0,2092 | 487  | -0,5776 | 4120 | 1 | -0,1316 | 1806  | 1 | 0,2368  | 905  | 1 | 0,3684  |
| CD83           | 5551  | 0,0958  | 3700  | 0,0708  | 2422 | 0,2265  | 4158 | 1 | 0,1307  | 13878 | 1 | -0,0250 | 3145 | 1 | -0,1557 |
| HSPA1A         | 1584  | -0,2281 | 11881 | -0,0140 | 1202 | -0,3588 | 4159 | 1 | -0,1307 | 2148  | 1 | 0,2141  | 1012 | 1 | 0,3448  |
| JAKMIP3        | 3129  | -0,1492 | 6025  | -0,0447 | 1786 | -0,2798 | 4161 | 1 | -0,1306 | 5476  | 1 | 0,1045  | 1801 | 1 | 0,2352  |
| HECW2          | 1072  | 0,2896  | 4542  | 0,0595  | 922  | 0,4197  | 4191 | 1 | 0,1300  | 1893  | 1 | -0,2302 | 944  | 1 | -0,3602 |
| TACC2          | 362   | -0,5106 | 395   | -0,2188 | 386  | -0,6402 | 4204 | 1 | -0,1296 | 1237  | 1 | 0,2918  | 718  | 1 | 0,4214  |
| RP11-1069G10.2 | 1948  | 0,1998  | 26798 | 0,0007  | 1376 | 0,3292  | 4217 | 1 | 0,1294  | 2408  | 1 | -0,1991 | 1092 | 1 | -0,3285 |
| EPB41L4B       | 695   | -0,3676 | 8393  | -0,0277 | 679  | -0,4956 | 4274 | 1 | -0,1280 | 935   | 1 | 0,3399  | 580  | 1 | 0,4679  |
| RP11-820L6.1   | 16740 | 0,0176  | 2787  | 0,0862  | 4382 | 0,1455  | 4276 | 1 | 0,1279  | 7879  | 1 | 0,0686  | 8519 | 1 | -0,0594 |
| ZP3            | 3303  | -0,1436 | 1919  | -0,1088 | 1852 | -0,2712 | 4301 | 1 | -0,1275 | 11794 | 1 | 0,0348  | 2984 | 1 | 0,1624  |
| AC005077.14    | 8180  | -0,0624 | 6136  | -0,0436 | 3128 | -0,1897 | 4308 | 1 | -0,1273 | 15638 | 1 | 0,0188  | 3429 | 1 | 0,1462  |
| MAML2          | 1116  | 0,2816  | 3663  | 0,0713  | 984  | 0,4089  | 4312 | 1 | 0,1273  | 2220  | 1 | -0,2103 | 1052 | 1 | -0,3375 |
| TFAP2C         | 320   | -0,5330 | 775   | -0,1660 | 356  | -0,6603 | 4313 | 1 | -0,1272 | 808   | 1 | 0,3671  | 524  | 1 | 0,4943  |
| RNF43          | 963   | -0,3058 | 1835  | -0,1109 | 879  | -0,4328 | 4322 | 1 | -0,1270 | 2488  | 1 | 0,1950  | 1119 | 1 | 0,3219  |

|            |       |         |       |         |      |         |      |   |         |         |   |         |       |   |         |
|------------|-------|---------|-------|---------|------|---------|------|---|---------|---------|---|---------|-------|---|---------|
| STAT3      | 1833  | -0,2080 | 227   | -0,2715 | 1333 | -0,3347 | 4336 | 1 | -0,1267 | 8335    | 1 | -0,0635 | 8132  | 1 | 0,0632  |
| USP36      | 2180  | -0,1869 | 1288  | -0,1332 | 1480 | -0,3132 | 4352 | 1 | -0,1263 | 9295    | 1 | 0,0537  | 2602  | 1 | 0,1800  |
| TTC39A     | 10236 | -0,0449 | 11163 | -0,0161 | 3603 | -0,1711 | 4354 | 1 | -0,1263 | 12932   | 1 | 0,0288  | 3164  | 1 | 0,1551  |
| ALOX5AP    | 970   | 0,3047  | 8991  | 0,0246  | 888  | 0,4309  | 4357 | 1 | 0,1262  | 1348    | 1 | -0,2802 | 756   | 1 | -0,4064 |
| MST1R      | 1277  | -0,2605 | 3110  | -0,0805 | 1057 | -0,3867 | 4358 | 1 | -0,1262 | 2807    | 1 | 0,1801  | 1217  | 1 | 0,3063  |
| ALDH1A3    | 6127  | -0,0871 | 4101  | -0,0650 | 2675 | -0,2121 | 4403 | 1 | -0,1250 | 14686   | 1 | 0,0221  | 3399  | 1 | 0,1471  |
| SERPINF2   | 13651 | -0,0274 | 1705  | -0,1154 | 4167 | -0,1522 | 4415 | 1 | -0,1248 | 6465    | 1 | -0,0880 | 11457 | 1 | 0,0369  |
| ZNF827     | 2462  | 0,1730  | 3103  | 0,0806  | 1622 | 0,2964  | 4474 | 1 | 0,1234  | 6199    | 1 | -0,0924 | 2022  | 1 | -0,2158 |
| ELK3       | 177   | 0,6705  | 2243  | 0,0993  | 225  | 0,7938  | 4480 | 1 | 0,1233  | 318     | 1 | -0,5712 | 254   | 1 | -0,6945 |
| RNFT2      | 665   | -0,3766 | 6491  | -0,0407 | 663  | -0,4998 | 4482 | 1 | -0,1233 | 956     | 1 | 0,3359  | 606   | 1 | 0,4592  |
| RASA1      | 2667  | 0,1655  | 787   | 0,1653  | 1705 | 0,2880  | 4528 | 1 | 0,1224  | 29592   | 1 | -0,0002 | 4291  | 1 | -0,1227 |
| STARD8     | 3459  | -0,1393 | 3482  | -0,0742 | 1964 | -0,2614 | 4549 | 1 | -0,1221 | 8189    | 1 | 0,0651  | 2465  | 1 | 0,1872  |
| FOXD1      | 13115 | 0,0288  | 13581 | 0,0104  | 4217 | 0,1506  | 4559 | 1 | 0,1218  | 15959   | 1 | -0,0185 | 3620  | 1 | -0,1403 |
| RAD51C     | 1523  | -0,2352 | 881   | -0,1585 | 1211 | -0,3563 | 4592 | 1 | -0,1211 | 7207    | 1 | 0,0767  | 2268  | 1 | 0,1978  |
| OBFC1      | 1574  | -0,2296 | 688   | -0,1752 | 1235 | -0,3507 | 4593 | 1 | -0,1210 | 9199    | 1 | 0,0544  | 2703  | 1 | 0,1754  |
| HEXIM1     | 3911  | -0,1272 | 2579  | -0,0910 | 2129 | -0,2481 | 4598 | 1 | -0,1209 | 11538   | 1 | 0,0363  | 3109  | 1 | 0,1572  |
| MYH15      | 253   | 0,5842  | 8338  | 0,0280  | 769  | 0,4633  | 4600 | 1 | -0,1209 | 345     | 1 | -0,5561 | 669   | 1 | -0,4353 |
| ANKRD1     | 65    | -0,8566 | 208   | -0,2786 | 122  | -0,9768 | 4631 | 1 | -0,1201 | 307     | 1 | 0,5780  | 251   | 1 | 0,6982  |
| PALM2      | 6545  | 0,0814  | 21034 | 0,0033  | 2873 | 0,2015  | 4632 | 1 | 0,1201  | 7114    | 1 | -0,0781 | 2261  | 1 | -0,1983 |
| PPL        | 535   | -0,4194 | 896   | -0,1569 | 580  | -0,5394 | 4636 | 1 | -0,1201 | 1518    | 1 | 0,2624  | 833   | 1 | 0,3825  |
| ROS1       | 4080  | 0,1235  | 10631 | 0,0178  | 2202 | 0,2427  | 4675 | 1 | 0,1192  | 5425    | 1 | -0,1057 | 1923  | 1 | -0,2249 |
| ARMC7      | 4293  | -0,1186 | 9543  | -0,0221 | 2277 | -0,2376 | 4686 | 1 | -0,1190 | 5940    | 1 | 0,0965  | 2023  | 1 | 0,2155  |
| HLA-B      | 2539  | 0,1702  | 1208  | 0,1378  | 1701 | 0,2885  | 4727 | 1 | 0,1183  | 12212   | 1 | -0,0325 | 3301  | 1 | -0,1508 |
| UBE2O      | 3722  | -0,1324 | 4683  | -0,0577 | 2091 | -0,2506 | 4736 | 1 | -0,1183 | 7361    | 1 | 0,0747  | 2356  | 1 | 0,1930  |
| SLCO4A1    | 654   | -0,3803 | 9509  | -0,0222 | 1956 | -0,2622 | 4741 | 1 | 0,1181  | 849     | 1 | 0,3580  | 1738  | 1 | 0,2399  |
| STARD13-AS | 8342  | 0,0607  | 4705  | 0,0575  | 3416 | 0,1786  | 4752 | 1 | 0,1179  | 27867   | 1 | -0,0032 | 4363  | 1 | -0,1211 |
| ITGB1      | 825   | 0,3390  | 862   | 0,1598  | 790  | 0,4569  | 4755 | 1 | 0,1179  | 2826    | 1 | -0,1792 | 1275  | 1 | -0,2970 |
| MICAL2     | 333   | 0,5247  | 1666  | 0,1167  | 383  | 0,6424  | 4767 | 1 | 0,1177  | 665     | 1 | -0,4079 | 469   | 1 | -0,5256 |
| STOM       | 325   | -0,5295 | 144   | -0,3274 | 377  | -0,6470 | 4777 | 1 | -0,1175 | 2355    | 1 | 0,2021  | 1134  | 1 | 0,3196  |
| RGAG1      | 27400 | 0,0017  | 15955 | 0,0071  | 5483 | 0,1184  | 4817 | 1 | 0,1167  | 23904,5 | 1 | 0,0054  | 4837  | 1 | -0,1113 |
| SYNPO2     | 1366  | -0,2507 | 2112  | -0,1028 | 1164 | -0,3670 | 4840 | 1 | -0,1163 | 3687    | 1 | 0,1479  | 1523  | 1 | 0,2642  |
| ALDH6A1    | 5361  | -0,0989 | 7774  | -0,0313 | 2620 | -0,2149 | 4854 | 1 | -0,1159 | 7964    | 1 | 0,0677  | 2537  | 1 | 0,1836  |
| SEMA3B     | 6700  | -0,0793 | 22339 | -0,0025 | 3015 | -0,1950 | 4873 | 1 | -0,1156 | 7200    | 1 | 0,0768  | 2367  | 1 | 0,1924  |



|               |       |         |       |         |      |         |      |   |         |       |   |         |        |   |         |
|---------------|-------|---------|-------|---------|------|---------|------|---|---------|-------|---|---------|--------|---|---------|
| PTPRH         | 4386  | -0,1166 | 5343  | -0,0508 | 2363 | -0,2317 | 4897 | 1 | -0,1151 | 8127  | 1 | 0,0658  | 2583   | 1 | 0,1809  |
| C1QBP         | 1093  | -0,2858 | 416   | -0,2146 | 1008 | -0,4008 | 4900 | 1 | -0,1151 | 7670  | 1 | 0,0711  | 2485   | 1 | 0,1862  |
| TOX2          | 1350  | -0,2525 | 2582  | -0,0909 | 1161 | -0,3672 | 4914 | 1 | -0,1147 | 3280  | 1 | 0,1616  | 1414   | 1 | 0,2763  |
| FIBCD1        | 122   | 0,7394  | 12121 | 0,0132  | 188  | 0,8537  | 4941 | 1 | 0,1143  | 176   | 1 | -0,7262 | 139    | 1 | -0,8404 |
| KCNE4         | 17240 | 0,0151  | 1415  | 0,1276  | 5013 | 0,1289  | 4965 | 1 | 0,1138  | 5108  | 1 | 0,1125  | 28546  | 1 | -0,0013 |
| FUT8          | 1533  | 0,2341  | 22171 | 0,0029  | 1251 | 0,3479  | 4966 | 1 | 0,1138  | 1878  | 1 | -0,2313 | 1010   | 1 | -0,3450 |
| PKP3          | 365   | -0,5093 | 10108 | -0,0198 | 1029 | -0,3957 | 4971 | 1 | 0,1136  | 457   | 1 | 0,4895  | 865    | 1 | 0,3759  |
| FES           | 7232  | -0,0727 | 2062  | -0,1042 | 3215 | -0,1860 | 4983 | 1 | -0,1133 | 12404 | 1 | -0,0315 | 6585   | 1 | 0,0818  |
| GATS          | 1178  | -0,2732 | 4195  | -0,0635 | 1060 | -0,3864 | 4988 | 1 | -0,1132 | 2232  | 1 | 0,2097  | 1114   | 1 | 0,3229  |
| RP6-99M1.3    | 26596 | 0,0030  | 6475  | 0,0408  | 5618 | 0,1155  | 5030 | 1 | 0,1124  | 11276 | 1 | 0,0378  | 7159   | 1 | -0,0746 |
| SCN9A         | 14020 | 0,0253  | 1538  | 0,1220  | 4673 | 0,1377  | 5031 | 1 | 0,1124  | 5918  | 1 | 0,0967  | 17065  | 1 | -0,0157 |
| KCNK5         | 3598  | -0,1353 | 3454  | -0,0747 | 2133 | -0,2473 | 5056 | 1 | -0,1120 | 8603  | 1 | 0,0606  | 2757   | 1 | 0,1726  |
| KHK           | 1806  | -0,2098 | 3049  | -0,0815 | 1430 | -0,3209 | 5093 | 1 | -0,1111 | 4377  | 1 | 0,1283  | 1745   | 1 | 0,2394  |
| CYB561        | 1554  | -0,2320 | 8480  | -0,0273 | 1287 | -0,3424 | 5139 | 1 | -0,1104 | 2319  | 1 | 0,2047  | 1155   | 1 | 0,3151  |
| COL12A1       | 13989 | 0,0253  | 174   | 0,3042  | 4758 | 0,1354  | 5161 | 1 | 0,1101  | 1356  | 1 | 0,2788  | 2846   | 1 | 0,1688  |
| IL1A          | 7320  | 0,0720  | 27131 | 0,0006  | 3331 | 0,1819  | 5166 | 1 | 0,1100  | 7645  | 1 | -0,0713 | 2576   | 1 | -0,1813 |
| RP11-757F18.5 | 687   | 0,3700  | 14464 | 0,0090  | 736  | 0,4787  | 5241 | 1 | 0,1087  | 834   | 1 | -0,3610 | 574    | 1 | -0,4697 |
| CITED2        | 1743  | -0,2151 | 10378 | -0,0188 | 1416 | -0,3231 | 5278 | 1 | -0,1080 | 2456  | 1 | 0,1964  | 1227   | 1 | 0,3043  |
| GRID1         | 4755  | 0,1089  | 9974  | 0,0203  | 2594 | 0,2162  | 5299 | 1 | 0,1073  | 6419  | 1 | -0,0886 | 2300   | 1 | -0,1959 |
| NLRP3         | 21054 | 0,0093  | 20990 | 0,0033  | 5584 | 0,1162  | 5319 | 1 | 0,1069  | 23538 | 1 | -0,0060 | 4759,5 | 1 | -0,1129 |
| OTUB2         | 760   | 0,3513  | 978   | 0,1505  | 789  | 0,4570  | 5385 | 1 | 0,1058  | 2381  | 1 | -0,2008 | 1213   | 1 | -0,3066 |
| SEPT10        | 543   | 0,4169  | 977   | 0,1506  | 609  | 0,5225  | 5399 | 1 | 0,1056  | 1477  | 1 | -0,2663 | 885    | 1 | -0,3719 |
| HS3ST6        | 5846  | -0,0913 | 4615  | -0,0584 | 2985 | -0,1958 | 5461 | 1 | -0,1045 | 12128 | 1 | 0,0329  | 3726,5 | 1 | 0,1374  |
| VPS37D        | 4961  | -0,1053 | 7597  | -0,0324 | 2725 | -0,2097 | 5464 | 1 | -0,1044 | 7507  | 1 | 0,0729  | 2670   | 1 | 0,1773  |
| TRIO          | 892   | 0,3221  | 687   | 0,1753  | 900  | 0,4263  | 5471 | 1 | 0,1042  | 3734  | 1 | -0,1468 | 1629   | 1 | -0,2510 |
| ANKLE2        | 959   | 0,3066  | 4412  | 0,0608  | 976  | 0,4101  | 5513 | 1 | 0,1035  | 1697  | 1 | -0,2458 | 986    | 1 | -0,3493 |
| DHRS11        | 2439  | -0,1738 | 1832  | -0,1110 | 1807 | -0,2771 | 5525 | 1 | -0,1033 | 8395  | 1 | 0,0628  | 2899   | 1 | 0,1661  |
| WBSCR27       | 8050  | -0,0638 | 6573  | -0,0400 | 3721 | -0,1666 | 5557 | 1 | -0,1028 | 14199 | 1 | 0,0237  | 4110   | 1 | 0,1266  |
| DZIP1L        | 1553  | 0,2321  | 8180  | 0,0289  | 1328 | 0,3349  | 5565 | 1 | 0,1028  | 2341  | 1 | -0,2032 | 1218   | 1 | -0,3059 |
| SLC16A9       | 4855  | -0,1072 | 3499  | -0,0741 | 2735 | -0,2092 | 5604 | 1 | -0,1020 | 12108 | 1 | 0,0331  | 3804   | 1 | 0,1351  |
| TGFBR3        | 192   | -0,6587 | 8302  | -0,0283 | 257  | -0,7606 | 5607 | 1 | -0,1020 | 239   | 1 | 0,6304  | 220    | 1 | 0,7324  |
| ZNF516        | 648   | 0,3820  | 1584  | 0,1202  | 717  | 0,4838  | 5618 | 1 | 0,1018  | 1523  | 1 | -0,2617 | 924    | 1 | -0,3636 |
| OBSCN         | 2126  | 0,1895  | 884   | 0,1581  | 1674 | 0,2912  | 5627 | 1 | 0,1017  | 12422 | 1 | -0,0314 | 3886   | 1 | -0,1331 |

|              |       |         |       |         |      |         |        |   |         |         |   |         |        |   |         |
|--------------|-------|---------|-------|---------|------|---------|--------|---|---------|---------|---|---------|--------|---|---------|
| ACSM3        | 1184  | -0,2715 | 2890  | -0,0845 | 1134 | -0,3718 | 5709   | 1 | -0,1003 | 2657    | 1 | 0,1870  | 1335   | 1 | 0,2873  |
| PARD6A       | 2017  | -0,1946 | 2796  | -0,0861 | 1641 | -0,2947 | 5723   | 1 | -0,1001 | 5288    | 1 | 0,1085  | 2109   | 1 | 0,2086  |
| PADI3        | 2937  | -0,1551 | 5438  | -0,0500 | 2035 | -0,2551 | 5730   | 1 | -0,1000 | 5450    | 1 | 0,1051  | 2158   | 1 | 0,2051  |
| ANK1         | 23    | -1,1787 | 2683  | -0,0884 | 47   | -1,2781 | 5765   | 1 | -0,0995 | 36      | 1 | 1,0902  | 39     | 1 | 1,1897  |
| NT5C         | 1740  | -0,2152 | 2607  | -0,0903 | 1473 | -0,3146 | 5774   | 1 | -0,0994 | 4526    | 1 | 0,1249  | 1930   | 1 | 0,2243  |
| AC007099.1   | 22139 | 0,0080  | 22050 | 0,0030  | 6055 | 0,1069  | 5802,5 | 1 | 0,0989  | 24191,5 | 1 | -0,0050 | 5218   | 1 | -0,1039 |
| MAP2K3       | 973   | -0,3041 | 2282  | -0,0983 | 2794 | -0,2058 | 5837   | 1 | 0,0983  | 2291    | 1 | 0,2058  | 5031   | 1 | 0,1075  |
| AC131025.8   | 16118 | 0,0185  | 20473 | 0,0033  | 5583 | 0,1162  | 5878   | 1 | 0,0977  | 17141   | 1 | -0,0152 | 4759,5 | 1 | -0,1129 |
| CMTM3        | 95    | 0,7867  | 933   | 0,1540  | 172  | 0,8843  | 5880   | 1 | 0,0977  | 237     | 1 | -0,6327 | 222    | 1 | -0,7304 |
| RP11-82L18.2 | 10317 | 0,0443  | 7165  | 0,0353  | 4502 | 0,1419  | 5890   | 1 | 0,0976  | 21550   | 1 | -0,0090 | 5070   | 1 | -0,1066 |
| ERV3-1       | 5866  | 0,0911  | 8507  | 0,0271  | 3179 | 0,1877  | 5943   | 1 | 0,0966  | 8284    | 1 | -0,0640 | 3038   | 1 | -0,1606 |
| LASP1        | 807   | -0,3422 | 7461  | -0,0334 | 857  | -0,4386 | 5954   | 1 | -0,0964 | 1125    | 1 | 0,3088  | 757    | 1 | 0,4053  |
| LUZP1        | 1456  | 0,2421  | 1154  | 0,1408  | 1303 | 0,3383  | 5964   | 1 | 0,0963  | 5668    | 1 | -0,1013 | 2271   | 1 | -0,1975 |
| TYSND1       | 1305  | -0,2574 | 3990  | -0,0664 | 1224 | -0,3534 | 5982   | 1 | -0,0959 | 2569    | 1 | 0,1910  | 1336   | 1 | 0,2869  |
| FOXA1        | 15796 | -0,0197 | 520   | -0,1972 | 5645 | -0,1150 | 6041   | 1 | -0,0952 | 2858    | 1 | -0,1775 | 6547   | 1 | -0,0822 |
| MALL         | 511   | -0,4283 | 9354  | -0,0229 | 1345 | -0,3333 | 6048   | 1 | 0,0951  | 678     | 1 | 0,4054  | 1195   | 1 | 0,3104  |
| DCAKD        | 2498  | -0,1718 | 497   | -0,2008 | 1910 | -0,2663 | 6081   | 1 | -0,0945 | 12882   | 1 | -0,0290 | 7906   | 1 | 0,0655  |
| CDH4         | 248   | 0,5900  | 1537  | 0,1221  | 332  | 0,6843  | 6106   | 1 | 0,0943  | 506     | 1 | -0,4679 | 414    | 1 | -0,5622 |
| ZIC5         | 865   | 0,3285  | 1541  | 0,1217  | 914  | 0,4223  | 6145   | 1 | 0,0937  | 2273    | 1 | -0,2068 | 1255   | 1 | -0,3005 |
| ATXN1        | 408   | 0,4768  | 14867 | 0,0082  | 1073 | 0,3831  | 6146   | 1 | -0,0937 | 502     | 1 | -0,4686 | 872    | 1 | -0,3749 |
| PER1         | 1834  | -0,2079 | 4070  | -0,0653 | 1577 | -0,3013 | 6161   | 1 | -0,0934 | 3866    | 1 | 0,1425  | 1789   | 1 | 0,2359  |
| RP11-438D8.2 | 7648  | 0,0683  | 12027 | 0,0136  | 3875 | 0,1613  | 6189   | 1 | 0,0930  | 9156    | 1 | -0,0547 | 3371   | 1 | -0,1477 |
| AP000462.2   | 15835 | 0,0194  | 13382 | 0,0105  | 5783 | 0,1120  | 6210,5 | 1 | 0,0926  | 21552,5 | 1 | -0,0090 | 5351   | 1 | -0,1015 |
| CNTNAP3      | 812   | -0,3409 | 1037  | -0,1463 | 876  | -0,4332 | 6224   | 1 | -0,0923 | 2498    | 1 | 0,1945  | 1338   | 1 | 0,2868  |
| PLD6         | 2528  | -0,1707 | 4821  | -0,0562 | 1951 | -0,2627 | 6240   | 1 | -0,0920 | 5022    | 1 | 0,1145  | 2130   | 1 | 0,2066  |
| RP11-160O5.1 | 3220  | -0,1456 | 3443  | -0,0748 | 2274 | -0,2376 | 6241   | 1 | -0,0920 | 7699    | 1 | 0,0708  | 2978   | 1 | 0,1628  |
| TLN2         | 113   | 0,7502  | 1387  | 0,1288  | 196  | 0,8422  | 6248   | 1 | 0,0919  | 255     | 1 | -0,6214 | 235    | 1 | -0,7133 |
| SOX13        | 4018  | -0,1247 | 2829  | -0,0855 | 2596 | -0,2161 | 6286   | 1 | -0,0914 | 11066   | 1 | 0,0391  | 3966   | 1 | 0,1306  |
| FAM83H       | 2694  | -0,1645 | 1660  | -0,1170 | 2032 | -0,2551 | 6338   | 1 | -0,0907 | 9988    | 1 | 0,0475  | 3705   | 1 | 0,1381  |
| PGD          | 749   | -0,3537 | 9109  | -0,0240 | 846  | -0,4438 | 6376   | 1 | -0,0902 | 993     | 1 | 0,3297  | 720    | 1 | 0,4198  |
| NOXA1        | 2786  | -0,1609 | 5949  | -0,0452 | 2085 | -0,2511 | 6380   | 1 | -0,0901 | 4939    | 1 | 0,1158  | 2146   | 1 | 0,2059  |
| RBFOX3       | 9965  | -0,0468 | 4854  | -0,0559 | 4717 | -0,1367 | 6402   | 1 | -0,0899 | 21544   | 1 | -0,0090 | 6655   | 1 | 0,0809  |
| GATA5        | 17288 | -0,0150 | 7869  | -0,0307 | 6193 | -0,1045 | 6429   | 1 | -0,0895 | 16986   | 1 | -0,0157 | 7213   | 1 | 0,0738  |

|            |       |         |       |         |      |         |        |   |         |        |   |         |        |   |         |
|------------|-------|---------|-------|---------|------|---------|--------|---|---------|--------|---|---------|--------|---|---------|
| ZDHC8P1    | 4724  | -0,1097 | 3337  | -0,0763 | 2925 | -0,1985 | 6472   | 1 | -0,0888 | 12029  | 1 | 0,0334  | 4314   | 1 | 0,1222  |
| NKX6-1     | 3194  | 0,1463  | 12270 | 0,0131  | 2313 | 0,2351  | 6478   | 1 | 0,0888  | 4201   | 1 | -0,1333 | 1953   | 1 | -0,2221 |
| RASSF6     | 8555  | -0,0585 | 5321  | -0,0510 | 4321 | -0,1472 | 6481,5 | 1 | -0,0888 | 22146  | 1 | 0,0074  | 5647   | 1 | 0,0962  |
| DMBX1      | 1446  | 0,2431  | 7395  | 0,0338  | 1356 | 0,3319  | 6485   | 1 | 0,0887  | 2242   | 1 | -0,2093 | 1270   | 1 | -0,2981 |
| IRF2BP2    | 1467  | -0,2409 | 4236  | -0,0629 | 1374 | -0,3296 | 6487   | 1 | -0,0887 | 2854   | 1 | 0,1779  | 1500   | 1 | 0,2666  |
| DCBLD1     | 268   | 0,5720  | 2865  | 0,0848  | 714  | 0,4840  | 6547   | 1 | -0,0880 | 464    | 1 | -0,4872 | 774    | 1 | -0,3992 |
| NR1D2      | 557   | 0,4119  | 640   | 0,1814  | 665  | 0,4997  | 6569   | 1 | 0,0877  | 1889   | 1 | -0,2305 | 1142   | 1 | -0,3183 |
| TGFB2      | 899   | 0,3201  | 390   | 0,2198  | 2326 | 0,2344  | 6716   | 1 | -0,0856 | 5718   | 1 | -0,1002 | 17485  | 1 | -0,0146 |
| SELENBP1   | 16616 | -0,0183 | 7174  | -0,0352 | 6284 | -0,1032 | 6776   | 1 | -0,0849 | 16516  | 1 | -0,0169 | 7702   | 1 | 0,0679  |
| NOTCH2     | 2392  | 0,1765  | 5862  | 0,0459  | 1969 | 0,2610  | 6796   | 1 | 0,0845  | 4293   | 1 | -0,1305 | 2029   | 1 | -0,2150 |
| ST6GALNAC5 | 27845 | 0,0017  | 12073 | 0,0136  | 7420 | 0,0852  | 6880,5 | 1 | 0,0835  | 18802  | 1 | 0,0119  | 7380,5 | 1 | -0,0716 |
| UGDH       | 890   | -0,3224 | 3486  | -0,0742 | 995  | -0,4052 | 6943   | 1 | -0,0827 | 1666   | 1 | 0,2483  | 1077   | 1 | 0,3310  |
| MTAP       | 7423  | 0,0707  | 18301 | 0,0051  | 4154 | 0,1525  | 7018   | 1 | 0,0818  | 8149   | 1 | -0,0655 | 3383   | 1 | -0,1474 |
| FLYWCH2    | 834   | -0,3369 | 3125  | -0,0802 | 932  | -0,4187 | 7025   | 1 | -0,0818 | 1580   | 1 | 0,2568  | 1049   | 1 | 0,3385  |
| SLAIN1     | 9777  | -0,0482 | 5763  | -0,0469 | 4997 | -0,1293 | 7090   | 1 | -0,0810 | 28673  | 1 | 0,0013  | 6542   | 1 | 0,0824  |
| A4GALT     | 9833  | -0,0477 | 6862  | -0,0377 | 5028 | -0,1286 | 7098   | 1 | -0,0809 | 19648  | 1 | 0,0100  | 5985   | 1 | 0,0909  |
| IGFBP1     | 7267  | -0,0724 | 13692 | -0,0101 | 4136 | -0,1531 | 7120   | 1 | -0,0807 | 8449   | 1 | 0,0623  | 3528   | 1 | 0,1430  |
| DAGLA      | 2632  | -0,1667 | 8587  | -0,0267 | 2158 | -0,2458 | 7242   | 1 | -0,0791 | 3966   | 1 | 0,1400  | 1989   | 1 | 0,2191  |
| RHPN2      | 25396 | -0,0052 | 1335  | -0,1307 | 7588 | -0,0830 | 7351   | 1 | -0,0778 | 4495   | 1 | -0,1256 | 9887   | 1 | -0,0477 |
| COPRS      | 5346  | -0,0991 | 545   | -0,1932 | 3463 | -0,1766 | 7377   | 1 | -0,0775 | 6087   | 1 | -0,0940 | 16728  | 1 | -0,0166 |
| AC005355.2 | 3963  | -0,1259 | 9518  | -0,0222 | 2836 | -0,2030 | 7409   | 1 | -0,0771 | 5523   | 1 | 0,1038  | 2585   | 1 | 0,1809  |
| GUCY1A2    | 4213  | -0,1202 | 3588  | -0,0725 | 2967 | -0,1968 | 7453   | 1 | -0,0766 | 9955   | 1 | 0,0477  | 4213,5 | 1 | 0,1243  |
| TPPP3      | 8570  | -0,0583 | 8220  | -0,0287 | 4799 | -0,1344 | 7499,5 | 1 | -0,0761 | 12787  | 1 | 0,0296  | 5112   | 1 | 0,1057  |
| IFIH1      | 8564  | -0,0583 | 7690  | -0,0318 | 4796 | -0,1344 | 7499,5 | 1 | -0,0761 | 13511  | 1 | 0,0265  | 5285   | 1 | 0,1026  |
| CA12       | 210   | -0,6346 | 8938  | -0,0249 | 300  | -0,7102 | 7537   | 1 | -0,0756 | 270    | 1 | 0,6098  | 264    | 1 | 0,6853  |
| SULT2B1    | 5090  | -0,1029 | 5143  | -0,0527 | 3429 | -0,1780 | 7556   | 1 | -0,0752 | 9694   | 1 | 0,0501  | 4162   | 1 | 0,1253  |
| PCDH10     | 5985  | 0,0895  | 25440 | 0,0018  | 3794 | 0,1643  | 7580   | 1 | 0,0748  | 6484   | 1 | -0,0877 | 2983   | 1 | -0,1625 |
| FAM195A    | 558   | -0,4118 | 14482 | -0,0089 | 1311 | -0,3373 | 7605   | 1 | 0,0746  | 689    | 1 | 0,4029  | 1093   | 1 | 0,3284  |
| ADAM11     | 10290 | -0,0445 | 11746 | -0,0144 | 5452 | -0,1190 | 7606   | 1 | -0,0745 | 12688  | 1 | 0,0301  | 5177   | 1 | 0,1047  |
| ZNF525     | 9741  | 0,0484  | 4321  | 0,0618  | 5278 | 0,1229  | 7610,5 | 1 | 0,0745  | 17908  | 1 | 0,0134  | 8341   | 1 | -0,0611 |
| PCDHAC1    | 5349  | -0,0991 | 6814  | -0,0380 | 3606 | -0,1711 | 7805,5 | 1 | -0,0720 | 8554,5 | 1 | 0,0611  | 3887,5 | 1 | 0,1331  |
| MDGA1      | 307   | 0,5478  | 2801  | 0,0860  | 738  | 0,4759  | 7820   | 1 | -0,0719 | 525    | 1 | -0,4618 | 804    | 1 | -0,3899 |
| WRAP53     | 3725  | -0,1324 | 321   | -0,2382 | 2819 | -0,2039 | 7841   | 1 | -0,0715 | 5420   | 1 | -0,1059 | 11909  | 1 | -0,0343 |

|               |       |         |       |         |       |         |        |   |         |         |   |         |        |   |         |
|---------------|-------|---------|-------|---------|-------|---------|--------|---|---------|---------|---|---------|--------|---|---------|
| TRAF4         | 3318  | -0,1433 | 3864  | -0,0683 | 2639  | -0,2141 | 7907   | 1 | -0,0708 | 7337    | 1 | 0,0749  | 3449   | 1 | 0,1457  |
| PPM1B         | 1214  | -0,2683 | 3287  | -0,0771 | 1301  | -0,3388 | 7917   | 1 | -0,0705 | 2561    | 1 | 0,1912  | 1538   | 1 | 0,2617  |
| AIFM3         | 11734 | -0,0358 | 9300  | -0,0231 | 6107  | -0,1058 | 7969,5 | 1 | -0,0700 | 18529   | 1 | 0,0127  | 6509   | 1 | 0,0827  |
| SPRY1         | 10754 | -0,0413 | 11277 | -0,0156 | 5906  | -0,1095 | 8126   | 1 | -0,0682 | 13728   | 1 | 0,0257  | 5803   | 1 | 0,0939  |
| GPR37         | 9070  | -0,0541 | 5879  | -0,0458 | 5319  | -0,1221 | 8145   | 1 | -0,0680 | 21950   | 1 | 0,0083  | 7024,5 | 1 | 0,0762  |
| NCKAP5        | 14948 | 0,0220  | 228   | 0,2703  | 7117  | 0,0893  | 8217   | 1 | 0,0673  | 1662    | 1 | 0,2484  | 2579   | 1 | 0,1811  |
| LIMD1         | 394   | -0,4853 | 11034 | -0,0163 | 936   | -0,4181 | 8229   | 1 | 0,0672  | 499     | 1 | 0,4690  | 768    | 1 | 0,4018  |
| AGMO          | 2616  | 0,1675  | 9025  | 0,0244  | 6417  | 0,1008  | 8278   | 1 | -0,0667 | 3849    | 1 | -0,1431 | 7012   | 1 | -0,0764 |
| C4orf26       | 4442  | 0,1156  | 15906 | 0,0071  | 3330  | 0,1819  | 8312   | 1 | 0,0664  | 5291    | 1 | -0,1084 | 2717   | 1 | -0,1748 |
| CTD-2560E9.5  | 13385 | 0,0276  | 16471 | 0,0066  | 6844  | 0,0938  | 8323,5 | 1 | 0,0662  | 14918,5 | 1 | -0,0210 | 6205,5 | 1 | -0,0873 |
| CACNG7        | 5330  | -0,0993 | 5022  | -0,0542 | 3762  | -0,1653 | 8346   | 1 | -0,0660 | 10287   | 1 | 0,0451  | 4842   | 1 | 0,1111  |
| PYGL          | 209   | 0,6353  | 7443  | 0,0335  | 504   | 0,5699  | 8385   | 1 | -0,0654 | 276     | 1 | -0,6018 | 452    | 1 | -0,5364 |
| FRYL          | 2713  | 0,1637  | 5282  | 0,0514  | 2390  | 0,2291  | 8388   | 1 | 0,0653  | 5111    | 1 | -0,1123 | 2664   | 1 | -0,1777 |
| CRIP1         | 28269 | -0,0002 | 6567  | -0,0401 | 8956  | -0,0654 | 8393   | 1 | -0,0653 | 10954   | 1 | -0,0399 | 13795  | 1 | 0,0254  |
| NPTX1         | 1     | 1,7606  | 1143  | 0,1411  | 15    | 1,6954  | 8398   | 1 | -0,0652 | 8       | 1 | -1,6195 | 11     | 1 | -1,5543 |
| HLA-DMB       | 3339  | -0,1427 | 3807  | -0,0694 | 2754  | -0,2079 | 8399   | 1 | -0,0652 | 7462    | 1 | 0,0734  | 3689   | 1 | 0,1386  |
| RP11-807H7.1  | 16468 | 0,0185  | 9391  | 0,0227  | 7618  | 0,0825  | 8493   | 1 | 0,0640  | 25814,5 | 1 | 0,0042  | 8471   | 1 | -0,0598 |
| RP11-131L23.1 | 19023 | 0,0123  | 10787 | 0,0173  | 8105  | 0,0758  | 8542   | 1 | 0,0635  | 24203   | 1 | 0,0050  | 8609   | 1 | -0,0585 |
| TSEN54        | 1131  | -0,2792 | 856   | -0,1603 | 1288  | -0,3423 | 8594   | 1 | -0,0630 | 4785    | 1 | 0,1190  | 2567   | 1 | 0,1820  |
| VLDLR         | 1117  | 0,2815  | 1614  | 0,1186  | 1280  | 0,3440  | 8647   | 1 | 0,0625  | 3237    | 1 | -0,1629 | 1916   | 1 | -0,2254 |
| MIR22HG       | 276   | 0,5645  | 5056  | 0,0537  | 655   | 0,5026  | 8710   | 1 | -0,0619 | 415     | 1 | -0,5108 | 635    | 1 | -0,4489 |
| PPP1R14C      | 588   | 0,4008  | 11224 | 0,0157  | 772   | 0,4627  | 8719   | 1 | 0,0619  | 745     | 1 | -0,3851 | 642    | 1 | -0,4470 |
| DNAAF3        | 5775  | -0,0923 | 5551  | -0,0488 | 4123  | -0,1536 | 8793   | 1 | -0,0613 | 10472   | 1 | 0,0435  | 5171   | 1 | 0,1047  |
| NPTXR         | 388   | 0,4873  | 4609  | 0,0585  | 556   | 0,5483  | 8829   | 1 | 0,0609  | 609     | 1 | -0,4289 | 538    | 1 | -0,4898 |
| SEMA3C        | 217   | 0,6268  | 934   | 0,1537  | 328   | 0,6874  | 8853   | 1 | 0,0606  | 491     | 1 | -0,4731 | 459    | 1 | -0,5337 |
| MLXIPL        | 14372 | -0,0234 | 8386  | -0,0277 | 7534  | -0,0837 | 8903   | 1 | -0,0602 | 25804   | 1 | -0,0043 | 8893   | 1 | 0,0560  |
| TAS2R14       | 6941  | 0,0758  | 6399  | 0,0414  | 17882 | 0,0156  | 8907   | 1 | -0,0602 | 11840   | 1 | -0,0344 | 13633  | 1 | 0,0258  |
| ANGPT1        | 10450 | -0,0432 | 6768  | -0,0384 | 6278  | -0,1032 | 8943,5 | 1 | -0,0599 | 24224,5 | 1 | 0,0049  | 7975,5 | 1 | 0,0648  |
| SPTBN4        | 14437 | -0,0231 | 7382  | -0,0339 | 7649  | -0,0822 | 9040   | 1 | -0,0591 | 19124   | 1 | -0,0108 | 9809   | 1 | 0,0483  |
| PTPRE         | 581   | 0,4041  | 1263  | 0,1343  | 1271  | 0,3451  | 9049   | 1 | -0,0591 | 1446    | 1 | -0,2698 | 2079   | 1 | -0,2107 |
| IFI35         | 4189  | -0,1207 | 6869  | -0,0377 | 3387  | -0,1797 | 9064   | 1 | -0,0590 | 6774    | 1 | 0,0831  | 3565   | 1 | 0,1420  |
| PER2          | 284   | -0,5595 | 573   | -0,1891 | 659   | -0,5007 | 9082   | 1 | 0,0588  | 794     | 1 | 0,3704  | 1182   | 1 | 0,3116  |
| RP11-265N7.1  | 11326 | 0,0377  | 15988 | 0,0071  | 6690  | 0,0964  | 9085   | 1 | 0,0587  | 12602,5 | 1 | -0,0305 | 6075   | 1 | -0,0893 |



|                |       |         |       |         |       |         |        |   |         |         |   |         |       |   |         |
|----------------|-------|---------|-------|---------|-------|---------|--------|---|---------|---------|---|---------|-------|---|---------|
| SNX8           | 1551  | -0,2322 | 886   | -0,1579 | 1680  | -0,2906 | 9100   | 1 | -0,0585 | 7402    | 1 | 0,0743  | 3891  | 1 | 0,1328  |
| ANXA13         | 4246  | -0,1196 | 4853  | -0,0559 | 3427  | -0,1780 | 9102   | 1 | -0,0584 | 8315    | 1 | 0,0637  | 4317  | 1 | 0,1222  |
| LRP1           | 578   | 0,4052  | 4566  | 0,0591  | 1256  | 0,3470  | 9126   | 1 | -0,0583 | 904     | 1 | -0,3461 | 1330  | 1 | -0,2879 |
| RP11-1002K11.1 | 1147  | 0,2766  | 1260  | 0,1345  | 1334  | 0,3347  | 9138   | 1 | 0,0581  | 3885    | 1 | -0,1422 | 2230  | 1 | -0,2003 |
| RNF144B        | 2863  | -0,1575 | 4988  | -0,0545 | 2612  | -0,2153 | 9162   | 1 | -0,0578 | 5573    | 1 | 0,1030  | 3028  | 1 | 0,1608  |
| ELMO1          | 27931 | -0,0015 | 8739  | -0,0258 | 9562  | -0,0591 | 9185,5 | 1 | -0,0576 | 14004   | 1 | -0,0244 | 12111 | 1 | 0,0332  |
| NRG1           | 1420  | 0,2464  | 4476  | 0,0601  | 1560  | 0,3039  | 9190   | 1 | 0,0575  | 2672    | 1 | -0,1863 | 1703  | 1 | -0,2438 |
| PM20D2         | 983   | -0,3034 | 5688  | -0,0476 | 1194  | -0,3600 | 9273   | 1 | -0,0566 | 1591    | 1 | 0,2557  | 1176  | 1 | 0,3123  |
| BEAN1          | 111   | 0,7508  | 4485  | 0,0600  | 216   | 0,8060  | 9422   | 1 | 0,0553  | 198     | 1 | -0,6908 | 204   | 1 | -0,7461 |
| TUBG2          | 2702  | -0,1641 | 766   | -0,1668 | 2557  | -0,2193 | 9429   | 1 | -0,0552 | 28169   | 1 | -0,0026 | 9278  | 1 | 0,0526  |
| GCHFR          | 2277  | -0,1818 | 4736  | -0,0572 | 2303  | -0,2357 | 9586   | 1 | -0,0539 | 4540    | 1 | 0,1246  | 2642  | 1 | 0,1785  |
| CDC42BPG       | 3146  | -0,1485 | 4987  | -0,0545 | 2862  | -0,2019 | 9646   | 1 | -0,0534 | 6094    | 1 | 0,0940  | 3382  | 1 | 0,1474  |
| GOLT1A         | 4905  | -0,1063 | 5301  | -0,0512 | 3948  | -0,1593 | 9682   | 1 | -0,0530 | 9123    | 1 | 0,0550  | 4995  | 1 | 0,1081  |
| SLC25A10       | 298   | -0,5504 | 1506  | -0,1234 | 673   | -0,4977 | 9714   | 1 | 0,0528  | 616     | 1 | 0,4270  | 875   | 1 | 0,3742  |
| MSC            | 575   | 0,4067  | 3280  | 0,0772  | 786   | 0,4584  | 9885   | 1 | 0,0516  | 995     | 1 | -0,3295 | 843   | 1 | -0,3812 |
| TSPAN5         | 709   | 0,3626  | 5472  | 0,0497  | 1498  | 0,3111  | 9902   | 1 | -0,0515 | 1090    | 1 | -0,3129 | 1544  | 1 | -0,2614 |
| LRP5           | 455   | -0,4523 | 2852  | -0,0851 | 1006  | -0,4014 | 9953   | 1 | 0,0509  | 807     | 1 | 0,3672  | 1152  | 1 | 0,3163  |
| WISP2          | 5561  | -0,0957 | 6595  | -0,0399 | 4350  | -0,1466 | 9967   | 1 | -0,0508 | 9041    | 1 | 0,0558  | 5068  | 1 | 0,1067  |
| TNFRSF9        | 26548 | 0,0033  | 564   | 0,1907  | 10103 | 0,0541  | 9978   | 1 | 0,0508  | 2646    | 1 | 0,1873  | 3753  | 1 | 0,1366  |
| REEP1          | 3702  | 0,1328  | 9749  | 0,0212  | 3290  | 0,1831  | 10050  | 1 | 0,0503  | 5142    | 1 | -0,1116 | 2998  | 1 | -0,1619 |
| EPB41L1        | 1108  | -0,2825 | 7490  | -0,0332 | 1348  | -0,3327 | 10062  | 1 | -0,0502 | 1653    | 1 | 0,2493  | 1262  | 1 | 0,2995  |
| ADAMTS9-AS1    | 12292 | 0,0325  | 10480 | 0,0183  | 7666  | 0,0819  | 10163  | 1 | 0,0494  | 17640,5 | 1 | -0,0142 | 8085  | 1 | -0,0636 |
| RP1-74M1.3     | 227   | 0,6154  | 2329  | 0,0971  | 351   | 0,6640  | 10265  | 1 | 0,0486  | 402     | 1 | -0,5182 | 403   | 1 | -0,5669 |
| SNAI1          | 282   | 0,5615  | 7228  | 0,0349  | 428   | 0,6100  | 10288  | 1 | 0,0485  | 387     | 1 | -0,5266 | 385   | 1 | -0,5751 |
| DUSP10         | 48    | 0,9566  | 1604  | 0,1191  | 113   | 1,0050  | 10306  | 1 | 0,0483  | 106     | 1 | -0,8376 | 115   | 1 | -0,8859 |
| CYP4F12        | 3336  | -0,1428 | 4702  | -0,0575 | 3109  | -0,1906 | 10370  | 1 | -0,0478 | 6644    | 1 | 0,0853  | 3885  | 1 | 0,1331  |
| PREX1          | 997   | -0,3011 | 3562  | -0,0729 | 1248  | -0,3482 | 10470  | 1 | -0,0471 | 1922    | 1 | 0,2282  | 1417  | 1 | 0,2753  |
| PRODH          | 1458  | -0,2418 | 3903  | -0,0677 | 1696  | -0,2889 | 10479  | 1 | -0,0470 | 2933    | 1 | 0,1742  | 1967  | 1 | 0,2212  |
| SLC22A4        | 2030  | 0,1939  | 2947  | 0,0834  | 2239  | 0,2405  | 10529  | 1 | 0,0466  | 5193    | 1 | -0,1105 | 3112  | 1 | -0,1571 |
| ACTBL2         | 7315  | 0,0720  | 26917 | 0,0006  | 5482  | 0,1184  | 10553  | 1 | 0,0464  | 7645    | 1 | -0,0713 | 4500  | 1 | -0,1178 |
| U8             | 12680 | 0,0302  | 4023  | 0,0659  | 8051  | 0,0765  | 10589  | 1 | 0,0462  | 11632   | 1 | 0,0356  | 20084 | 1 | -0,0106 |
| AC096677.1     | 886   | 0,3230  | 10499 | 0,0183  | 1152  | 0,3692  | 10593  | 1 | 0,0462  | 1143    | 1 | -0,3048 | 983   | 1 | -0,3510 |
| EPHA10         | 2838  | -0,1585 | 7707  | -0,0317 | 2830  | -0,2033 | 10768  | 1 | -0,0448 | 4446    | 1 | 0,1268  | 2782  | 1 | 0,1716  |

|               |       |         |       |         |       |         |       |   |         |         |   |         |         |   |         |
|---------------|-------|---------|-------|---------|-------|---------|-------|---|---------|---------|---|---------|---------|---|---------|
| TGFA          | 790   | -0,3440 | 6355  | -0,0417 | 1052  | -0,3888 | 10770 | 1 | -0,0448 | 1151    | 1 | 0,3023  | 998     | 1 | 0,3471  |
| GLIPR1        | 222   | 0,6208  | 637   | 0,1815  | 350   | 0,6656  | 10776 | 1 | 0,0447  | 583     | 1 | -0,4394 | 553     | 1 | -0,4841 |
| PHLDB1        | 26    | 1,1293  | 6969  | 0,0368  | 59    | 1,1739  | 10793 | 1 | 0,0446  | 35      | 1 | -1,0925 | 47      | 1 | -1,1371 |
| CD14          | 1099  | -0,2844 | 1349  | -0,1304 | 1378  | -0,3289 | 10810 | 1 | -0,0445 | 3510    | 1 | 0,1540  | 2255    | 1 | 0,1985  |
| TMOD2         | 666   | 0,3765  | 6429  | 0,0411  | 925   | 0,4195  | 11018 | 1 | 0,0431  | 960     | 1 | -0,3353 | 853     | 1 | -0,3784 |
| CUTC          | 835   | -0,3368 | 1622  | -0,1182 | 1090  | -0,3798 | 11023 | 1 | -0,0430 | 2064    | 1 | 0,2186  | 1540    | 1 | 0,2616  |
| ANKRD30A      | 7188  | -0,0732 | 6156  | -0,0434 | 5604  | -0,1158 | 11077 | 1 | -0,0427 | 12770   | 1 | 0,0298  | 7314    | 1 | 0,0725  |
| CYP4F3        | 1431  | -0,2450 | 3348  | -0,0761 | 1721  | -0,2861 | 11319 | 1 | -0,0411 | 3093    | 1 | 0,1688  | 2089    | 1 | 0,2100  |
| HMCN1         | 6525  | 0,0817  | 437   | 0,2109  | 5297  | 0,1225  | 11355 | 1 | 0,0409  | 4345    | 1 | 0,1292  | 6137    | 1 | 0,0883  |
| CTNNAL1       | 105   | -0,7644 | 7037  | -0,0362 | 285   | -0,7237 | 11374 | 1 | 0,0407  | 172     | 1 | 0,7282  | 260     | 1 | 0,6875  |
| DNAJB4        | 371   | 0,5008  | 9110  | 0,0240  | 775   | 0,4612  | 11524 | 1 | -0,0396 | 483     | 1 | -0,4769 | 667     | 1 | -0,4372 |
| CBLN2         | 3266  | 0,1444  | 17189 | 0,0057  | 3268  | 0,1839  | 11547 | 1 | 0,0395  | 4007    | 1 | -0,1387 | 2651    | 1 | -0,1782 |
| INHBB         | 353   | -0,5151 | 1135  | -0,1415 | 538   | -0,5536 | 11683 | 1 | -0,0385 | 784     | 1 | 0,3736  | 740     | 1 | 0,4122  |
| RP11-53B2.2   | 1880  | 0,2047  | 16711 | 0,0066  | 2200  | 0,2428  | 11756 | 1 | 0,0380  | 2426    | 1 | -0,1982 | 1785    | 1 | -0,2362 |
| FMN2          | 1623  | -0,2243 | 7701  | -0,0318 | 1966  | -0,2613 | 11946 | 1 | -0,0370 | 2536    | 1 | 0,1925  | 1873    | 1 | 0,2295  |
| HIP1          | 538   | -0,4186 | 932   | -0,1541 | 797   | -0,4554 | 11969 | 1 | -0,0368 | 1501    | 1 | 0,2646  | 1245    | 1 | 0,3014  |
| SNORD112      | 3765  | 0,1312  | 12463 | 0,0125  | 6764  | 0,0950  | 12060 | 1 | -0,0362 | 4797    | 1 | -0,1187 | 6526    | 1 | -0,0825 |
| ACOX2         | 2110  | -0,1901 | 6275  | -0,0424 | 2435  | -0,2258 | 12138 | 1 | -0,0357 | 3695    | 1 | 0,1477  | 2541    | 1 | 0,1834  |
| GOS2          | 1039  | -0,2931 | 3886  | -0,0679 | 2004  | -0,2575 | 12188 | 1 | 0,0356  | 1969    | 1 | 0,2252  | 2428    | 1 | 0,1896  |
| LTBP3         | 136   | 0,7183  | 2635  | 0,0896  | 264   | 0,7535  | 12322 | 1 | 0,0352  | 242     | 1 | -0,6286 | 282     | 1 | -0,6638 |
| S100P         | 17374 | -0,0150 | 12819 | -0,0118 | 10602 | -0,0500 | 12380 | 1 | -0,0350 | 27857,5 | 1 | 0,0032  | 11242,5 | 1 | 0,0382  |
| NFASC         | 2418  | 0,1749  | 11801 | 0,0141  | 2728  | 0,2096  | 12471 | 1 | 0,0347  | 3305    | 1 | -0,1607 | 2308    | 1 | -0,1955 |
| SPTLC2        | 978   | 0,3038  | 11141 | 0,0162  | 1304  | 0,3382  | 12533 | 1 | 0,0344  | 1277    | 1 | -0,2876 | 1117    | 1 | -0,3221 |
| KCTD12        | 8376  | -0,0604 | 7577  | -0,0325 | 6791  | -0,0947 | 12588 | 1 | -0,0343 | 13135   | 1 | 0,0279  | 8241    | 1 | 0,0622  |
| TTLL6         | 8381  | -0,0604 | 6320  | -0,0420 | 6794  | -0,0947 | 12588 | 1 | -0,0343 | 15995   | 1 | 0,0184  | 9256    | 1 | 0,0527  |
| AQP3          | 3548  | -0,1369 | 4228  | -0,0630 | 3622  | -0,1708 | 12686 | 1 | -0,0339 | 7429    | 1 | 0,0739  | 5009    | 1 | 0,1078  |
| TES           | 426   | 0,4707  | 7364  | 0,0340  | 656   | 0,5024  | 13103 | 1 | 0,0317  | 589     | 1 | -0,4367 | 578     | 1 | -0,4684 |
| TRERF1        | 674   | -0,3741 | 3494  | -0,0741 | 1286  | -0,3427 | 13136 | 1 | 0,0314  | 1168    | 1 | 0,3000  | 1476    | 1 | 0,2686  |
| TSPAN1        | 1229  | -0,2661 | 3254  | -0,0776 | 1608  | -0,2974 | 13137 | 1 | -0,0313 | 2623    | 1 | 0,1885  | 1980    | 1 | 0,2198  |
| RP11-1055B8.7 | 921   | -0,3156 | 28099 | 0,0000  | 1740  | -0,2843 | 13142 | 1 | 0,0313  | 1070    | 1 | 0,3155  | 1360    | 1 | 0,2842  |
| C5            | 699   | -0,3658 | 1002  | -0,1487 | 1024  | -0,3968 | 13171 | 1 | -0,0309 | 2091    | 1 | 0,2171  | 1660    | 1 | 0,2481  |
| SH2D5         | 685   | -0,3718 | 10081 | -0,0199 | 1003  | -0,4023 | 13230 | 1 | -0,0305 | 877     | 1 | 0,3518  | 836     | 1 | 0,3824  |
| AREG          | 1813  | -0,2095 | 9037  | -0,0244 | 2252  | -0,2395 | 13356 | 1 | -0,0300 | 2686    | 1 | 0,1851  | 2028    | 1 | 0,2151  |

|               |       |         |       |         |       |         |         |   |         |         |   |         |        |   |         |
|---------------|-------|---------|-------|---------|-------|---------|---------|---|---------|---------|---|---------|--------|---|---------|
| RP11-392B6.1  | 5925  | 0,0903  | 7729  | 0,0316  | 5404  | 0,1202  | 13380   | 1 | 0,0299  | 8772    | 1 | -0,0587 | 6120   | 1 | -0,0886 |
| TJP3          | 2073  | -0,1918 | 3590  | -0,0725 | 2519  | -0,2214 | 13424   | 1 | -0,0296 | 4771    | 1 | 0,1193  | 3343,5 | 1 | 0,1489  |
| HSPA1B        | 2229  | -0,1842 | 18993 | -0,0045 | 2646  | -0,2138 | 13434   | 1 | -0,0296 | 2816    | 1 | 0,1797  | 2096   | 1 | 0,2093  |
| AIF1L         | 5826  | -0,0916 | 3855  | -0,0686 | 9258  | -0,0621 | 13452   | 1 | 0,0295  | 14367   | 1 | 0,0230  | 23038  | 1 | -0,0064 |
| RP11-36N20.1  | 5951  | 0,0900  | 22462 | 0,0024  | 9407  | 0,0608  | 13494   | 1 | -0,0292 | 6486    | 1 | -0,0876 | 8619,5 | 1 | -0,0584 |
| STXBP5-AS1    | 4838  | 0,1073  | 12887 | 0,0115  | 4728  | 0,1364  | 13514   | 1 | 0,0291  | 5991    | 1 | -0,0958 | 4187,5 | 1 | -0,1248 |
| EZR           | 312   | -0,5420 | 2434  | -0,0945 | 502   | -0,5705 | 13601   | 1 | -0,0285 | 552     | 1 | 0,4475  | 561    | 1 | 0,4760  |
| KRT15         | 4730  | -0,1096 | 5129  | -0,0529 | 4665  | -0,1379 | 13620   | 1 | -0,0284 | 8954    | 1 | 0,0567  | 6345   | 1 | 0,0851  |
| HTRA1         | 229   | 0,6108  | 9430  | 0,0226  | 387   | 0,6390  | 13630   | 1 | 0,0283  | 292     | 1 | -0,5882 | 326    | 1 | -0,6165 |
| RP11-170N16.3 | 4025  | 0,1245  | 14149 | 0,0097  | 4166  | 0,1523  | 13763   | 1 | 0,0278  | 4997    | 1 | -0,1149 | 3546   | 1 | -0,1426 |
| SPRY3         | 4067  | 0,1238  | 7086  | 0,0358  | 4218  | 0,1506  | 14050   | 1 | 0,0268  | 6463    | 1 | -0,0880 | 4661   | 1 | -0,1148 |
| RASSF7        | 1232  | -0,2658 | 1416  | -0,1276 | 1661  | -0,2925 | 14062   | 1 | -0,0267 | 4030    | 1 | 0,1382  | 2932   | 1 | 0,1649  |
| METRNL        | 631   | 0,3872  | 6797  | 0,0382  | 957   | 0,4136  | 14121   | 1 | 0,0264  | 893     | 1 | -0,3490 | 867    | 1 | -0,3754 |
| PHLDB2        | 767   | 0,3490  | 5294  | 0,0513  | 1418  | 0,3226  | 14154   | 1 | -0,0263 | 1189    | 1 | -0,2977 | 1452   | 1 | -0,2713 |
| LPHN3         | 20940 | 0,0093  | 8149  | 0,0291  | 12600 | 0,0356  | 14176   | 1 | 0,0263  | 15271,5 | 1 | 0,0198  | 22986  | 1 | -0,0065 |
| CTD-2066L21.1 | 1250  | 0,2637  | 22408 | 0,0024  | 1689  | 0,2898  | 14263   | 1 | 0,0261  | 1527    | 1 | -0,2613 | 1332   | 1 | -0,2874 |
| ST6GALNAC3    | 17029 | 0,0165  | 4960  | 0,0548  | 11591 | 0,0425  | 14296   | 1 | 0,0260  | 11200   | 1 | 0,0383  | 18742  | 1 | 0,0123  |
| UNC13A        | 5410  | -0,0980 | 19226 | -0,0044 | 5245  | -0,1238 | 14506   | 1 | -0,0258 | 6111    | 1 | 0,0937  | 4431   | 1 | 0,1195  |
| SLC25A45      | 5283  | -0,1001 | 8495  | -0,0271 | 5146  | -0,1258 | 14511,5 | 1 | -0,0257 | 7504    | 1 | 0,0729  | 5489   | 1 | 0,0987  |
| MB            | 2540  | -0,1702 | 4616  | -0,0584 | 2986  | -0,1958 | 14520   | 1 | -0,0256 | 5130    | 1 | 0,1118  | 3726,5 | 1 | 0,1374  |
| SLC22A3       | 984   | 0,3032  | 9171  | 0,0237  | 1802  | 0,2777  | 14535   | 1 | -0,0254 | 1350    | 1 | -0,2795 | 1599   | 1 | -0,2541 |
| CD151         | 379   | 0,4945  | 4156  | 0,0641  | 619   | 0,5197  | 14632   | 1 | 0,0252  | 607     | 1 | -0,4304 | 621    | 1 | -0,4556 |
| RHOV          | 1156  | -0,2757 | 13138 | -0,0110 | 1589  | -0,2998 | 14813   | 1 | -0,0241 | 1499    | 1 | 0,2647  | 1321   | 1 | 0,2888  |
| RP11-70J12.1  | 7787  | 0,0668  | 7769  | 0,0313  | 11552 | 0,0427  | 14828   | 1 | -0,0240 | 11671   | 1 | -0,0354 | 19808  | 1 | -0,0114 |
| AC006262.4    | 124   | 0,7346  | 20334 | 0,0033  | 260   | 0,7582  | 15182   | 1 | 0,0236  | 168     | 1 | -0,7313 | 197    | 1 | -0,7549 |
| PVR           | 1016  | 0,2983  | 985   | 0,1502  | 1425  | 0,3217  | 15365   | 1 | 0,0234  | 3675    | 1 | -0,1481 | 2784   | 1 | -0,1715 |
| AKAP12        | 328   | 0,5279  | 258   | 0,2583  | 546   | 0,5504  | 15565   | 1 | 0,0225  | 1447    | 1 | -0,2696 | 1302   | 1 | -0,2921 |
| C17orf96      | 3475  | -0,1388 | 608   | -0,1838 | 3880  | -0,1612 | 15576   | 1 | -0,0224 | 10307   | 1 | -0,0450 | 14605  | 1 | -0,0226 |
| FAM84B        | 1150  | -0,2765 | 12133 | -0,0132 | 1593  | -0,2987 | 15594   | 1 | -0,0222 | 1512    | 1 | 0,2634  | 1347   | 1 | 0,2856  |
| FGFBP1        | 477   | -0,4436 | 4953  | -0,0549 | 761   | -0,4657 | 15602   | 1 | -0,0221 | 736     | 1 | 0,3887  | 746    | 1 | 0,4108  |
| MMP24         | 161   | -0,6884 | 6258  | -0,0426 | 301   | -0,7101 | 15651   | 1 | -0,0217 | 228     | 1 | 0,6459  | 278    | 1 | 0,6676  |
| SLCO1B1       | 7056  | 0,0747  | 2060  | 0,1042  | 6700  | 0,0963  | 15680   | 1 | 0,0216  | 12801   | 1 | 0,0295  | 21915  | 1 | 0,0079  |
| CDC42EP4      | 694   | -0,3676 | 4429  | -0,0607 | 1253  | -0,3474 | 15992   | 1 | 0,0202  | 1130    | 1 | 0,3070  | 1339   | 1 | 0,2867  |

|               |      |         |       |         |      |         |         |   |         |         |   |         |        |   |         |
|---------------|------|---------|-------|---------|------|---------|---------|---|---------|---------|---|---------|--------|---|---------|
| CNTNAP3B      | 815  | -0,3407 | 177   | -0,3027 | 1432 | -0,3207 | 16019   | 1 | 0,0200  | 11264   | 1 | 0,0379  | 16230  | 1 | 0,0179  |
| ANKRD2        | 2505 | -0,1714 | 9910  | -0,0206 | 3102 | -0,1909 | 16084   | 1 | -0,0195 | 3593    | 1 | 0,1509  | 2817   | 1 | 0,1703  |
| PPAPDC1A      | 3406 | 0,1408  | 16572 | 0,0066  | 3934 | 0,1597  | 16242   | 1 | 0,0189  | 4165    | 1 | -0,1342 | 3228   | 1 | -0,1531 |
| RP11-292F22.7 | 1532 | 0,2343  | 16958 | 0,0062  | 2603 | 0,2158  | 16301   | 1 | -0,0185 | 1925    | 1 | -0,2281 | 2092   | 1 | -0,2096 |
| PLCD3         | 498  | -0,4354 | 7822  | -0,0310 | 808  | -0,4530 | 17076   | 1 | -0,0176 | 684     | 1 | 0,4045  | 716    | 1 | 0,4220  |
| BCL2L15       | 9135 | -0,0534 | 16156 | -0,0068 | 8541 | -0,0704 | 17238   | 1 | -0,0170 | 10074   | 1 | 0,0466  | 8079,5 | 1 | 0,0636  |
| LIN28B        | 7765 | -0,0668 | 7837  | -0,0309 | 7533 | -0,0837 | 17366,5 | 1 | -0,0169 | 11593,5 | 1 | 0,0360  | 9244,5 | 1 | 0,0528  |
| EXOC3L4       | 6170 | -0,0865 | 13736 | -0,0100 | 6280 | -0,1032 | 17448   | 1 | -0,0166 | 7218    | 1 | 0,0765  | 5855   | 1 | 0,0932  |
| EDIL3         | 9056 | 0,0541  | 1602  | 0,1192  | 8616 | 0,0696  | 17932   | 1 | 0,0155  | 8187    | 1 | 0,0651  | 9659   | 1 | 0,0497  |
| PDLIM5        | 644  | -0,3826 | 53    | -0,4625 | 1159 | -0,3677 | 18211   | 1 | 0,0149  | 6991    | 1 | -0,0798 | 5742   | 1 | -0,0947 |
| MGAM          | 6341 | -0,0841 | 6468  | -0,0409 | 6577 | -0,0982 | 18758,5 | 1 | -0,0141 | 10495   | 1 | 0,0432  | 8744   | 1 | 0,0573  |
| DSE           | 243  | 0,5933  | 3142  | 0,0798  | 485  | 0,5792  | 18762   | 1 | -0,0141 | 408     | 1 | -0,5134 | 516    | 1 | -0,4993 |
| RNF135        | 5232 | -0,1009 | 723   | -0,1717 | 5653 | -0,1148 | 18776   | 1 | -0,0139 | 7695    | 1 | -0,0709 | 8787   | 1 | -0,0569 |
| SLC12A2       | 370  | -0,5019 | 29    | -0,5243 | 629  | -0,5158 | 18784   | 1 | -0,0139 | 14519   | 1 | -0,0224 | 21774  | 1 | -0,0085 |
| AKR1B10P1     | 729  | -0,3589 | 11219 | -0,0157 | 1127 | -0,3728 | 18787   | 1 | -0,0139 | 919     | 1 | 0,3432  | 957    | 1 | 0,3571  |
| SGSM1         | 3673 | -0,1335 | 5656  | -0,0479 | 4322 | -0,1472 | 18803   | 1 | -0,0137 | 6631    | 1 | 0,0856  | 5464   | 1 | 0,0993  |
| BCL6          | 4173 | -0,1211 | 1734  | -0,1145 | 4785 | -0,1347 | 18819   | 1 | -0,0136 | 22954   | 1 | 0,0067  | 15425  | 1 | 0,0203  |
| PLAUR         | 231  | 0,6087  | 7089  | 0,0358  | 412  | 0,6222  | 18836   | 1 | 0,0135  | 317     | 1 | -0,5729 | 365    | 1 | -0,5864 |
| ZNF467        | 2153 | -0,1880 | 9406  | -0,0227 | 2888 | -0,2009 | 18907   | 1 | -0,0129 | 3181    | 1 | 0,1653  | 2648   | 1 | 0,1782  |
| PAPLN         | 4982 | -0,1048 | 28050 | -0,0002 | 5522 | -0,1176 | 19006   | 1 | -0,0127 | 5470    | 1 | 0,1047  | 4521   | 1 | 0,1174  |
| GDA           | 3429 | -0,1401 | 4645  | -0,0581 | 4152 | -0,1525 | 19142   | 1 | -0,0124 | 6854    | 1 | 0,0820  | 5763   | 1 | 0,0945  |
| TERT          | 1912 | -0,2021 | 5008  | -0,0543 | 3131 | -0,1897 | 19144   | 1 | 0,0124  | 3690    | 1 | 0,1478  | 3797   | 1 | 0,1354  |
| GCLC          | 636  | -0,3863 | 771   | -0,1664 | 1118 | -0,3740 | 19202   | 1 | 0,0123  | 2044    | 1 | 0,2199  | 2117   | 1 | 0,2076  |
| RP11-114F10.3 | 2640 | 0,1664  | 28066 | 0,0001  | 3447 | 0,1774  | 20909   | 1 | 0,0109  | 3154    | 1 | -0,1663 | 2671   | 1 | -0,1772 |
| RP11-170N16.2 | 8385 | 0,0604  | 12024 | 0,0136  | 8536 | 0,0704  | 21109   | 1 | 0,0100  | 10060   | 1 | -0,0468 | 8796,5 | 1 | -0,0568 |
| LIMK2         | 572  | 0,4075  | 7613  | 0,0323  | 939  | 0,4172  | 21213   | 1 | 0,0097  | 777     | 1 | -0,3752 | 829    | 1 | -0,3849 |
| KCNF1         | 1031 | -0,2945 | 13137 | -0,0110 | 1710 | -0,2874 | 23457   | 1 | 0,0071  | 1311    | 1 | 0,2835  | 1412   | 1 | 0,2764  |
| CSF2RA        | 675  | -0,3740 | 13101 | -0,0111 | 1087 | -0,3805 | 24139   | 1 | -0,0065 | 828     | 1 | 0,3629  | 898    | 1 | 0,3694  |
| NR2F6         | 1136 | -0,2784 | 1126  | -0,1420 | 1844 | -0,2721 | 24473   | 1 | 0,0063  | 4086    | 1 | 0,1364  | 3980   | 1 | 0,1301  |
| NEDD4L        | 517  | -0,4260 | 2501  | -0,0929 | 884  | -0,4318 | 24681   | 1 | -0,0058 | 976     | 1 | 0,3331  | 1044   | 1 | 0,3388  |
| SPDEF         | 194  | -0,6531 | 285   | -0,2472 | 374  | -0,6494 | 25346   | 1 | 0,0038  | 673     | 1 | 0,4059  | 766    | 1 | 0,4021  |
| FRMD3         | 3310 | -0,1435 | 1399  | -0,1280 | 4547 | -0,1408 | 26398   | 1 | 0,0027  | 17027   | 1 | 0,0155  | 18257  | 1 | 0,0127  |
| RP11-361F15.2 | 1498 | 0,2375  | 13249 | 0,0107  | 2284 | 0,2372  | 28764   | 1 | -0,0003 | 1946    | 1 | -0,2268 | 1908   | 1 | -0,2265 |



|        |      |         |      |         |       |         |       |   |         |       |   |         |       |   |         |
|--------|------|---------|------|---------|-------|---------|-------|---|---------|-------|---|---------|-------|---|---------|
| MBOAT1 | 9416 | -0,0510 | 3422 | -0,0751 | 10423 | -0,0512 | 29357 | 1 | -0,0002 | 14116 | 1 | -0,0240 | 14293 | 1 | -0,0238 |
|--------|------|---------|------|---------|-------|---------|-------|---|---------|-------|---|---------|-------|---|---------|

<sup>1</sup> order of identified genes

<sup>2</sup> indicates agreement or difference in expression change relative to A549scr
