# Supplementary material for: Identification of AGR2 Gene-Specific Expression Patterns Associated with Epithelial-Mesenchymal Transition
Source: MDPI journal article supplement (doi:10.3390/ijms231810845), 2022-09-16
Supplement: s1 [file s1]

**Table S3:** List of RT-qPCR primers and their sequences

| Primer    | Sequence                   |
|-----------|----------------------------|
| COL4A1_F  | TCTTCCTTTGAAAGACTGTGCTGTCC |
| COL4A1_R  | ACCTGGGTTTGGTTTTGGCAACA    |
| COLRA2_F  | CCCGGGCTAAAAGGAGATAG       |
| COL4A2_R  | GACCGGGTATTCCGAAAAAT       |
| FLNA_F    | CCATGACAACACCTACACAGTCA    |
| FLNA_R    | CTTGGAGATACTGCCACTGAGAA    |
| VAV3_F    | GGACCAATGGACTGCGAAGAA      |
| VAV3_R    | CTGGAGCTGTAAAGGGGGTC       |
| VEGFA_F   | CTGCTGTCTTGGGTGCATTGG      |
| VEGFA_R   | CACCGCCTCGGCTTGTCACAT      |
| VINC_F    | AAACACAGTTACACTTGTGCACCC   |
| VINC_R    | AACAGAGGGAAGTGTCCCCT       |
| GPX2_F    | GGTAGATTTCAATACGTTCCGGG    |
| GPX2_R    | TGACAGTTCTCCTGATGTCCAAA    |
| PLA2G4A_F | ATGGCCTTGGTGAGTGATTC       |
| PLA2G4A_R | TCAGGATCTGCTACAGCTGC       |
| PTGS2_F   | CCTGTGCCTGATGATTGC         |
| PTGS2_R   | CTGATGCGTGAAGTGCTG         |
| GAPDH_F   | TACTAGCGGTTTTACGGGCG       |
| GAPDH_R   | TCGAACAGGAGGAGCAGAGAG      |
