# Supplementary material for: Identification of AGR2 Gene-Specific Expression Patterns Associated with Epithelial-Mesenchymal Transition
Source: MDPI journal article supplement (doi:10.3390/ijms231810845), 2022-09-16
Supplement: s1 [file s1]

**Table S2.** Summary of all identified pathway results with analysis conditions depicted in Figure 2, their corresponding number of genes, and P-level

| Experimental definition                        | Kegg pathways                                                           | p value   | Number of genes |
|------------------------------------------------|-------------------------------------------------------------------------|-----------|-----------------|
| A: scr TGFβ vs scr ; 0.67 > FC > 1.5; p < 0.05 | Focal adhesion                                                          | 7,50E-10* | 33              |
|                                                | Proteoglycans in cancer                                                 | 2,60E-07* | 29              |
|                                                | ECM-receptor interaction                                                | 4,90E-07* | 18              |
|                                                | AGE-RAGE signaling pathway in diabetic complications                    | 6,80E-07* | 19              |
|                                                | Pathways in cancer                                                      | 1,20E-06* | 51              |
|                                                | Small cell lung cancer                                                  | 4,50E-06* | 17              |
|                                                | PI3K-Akt signaling pathway                                              | 7,60E-06* | 37              |
|                                                | Human papillomavirus infection                                          | 1,10E-05* | 35              |
|                                                | Hippo signaling pathway                                                 | 1,20E-05* | 22              |
|                                                | Axon guidance                                                           | 1,20E-05* | 24              |
|                                                | MAPK signaling pathway                                                  | 1,70E-05* | 32              |
|                                                | Rap1 signaling pathway                                                  | 4,20E-05* | 25              |
|                                                | Regulation of actin cytoskeleton                                        | 7,70E-05* | 25              |
|                                                | Arrhythmogenic right ventricular cardiomyopathy                         | 2,10E-04* | 13              |
|                                                | Transcriptional misregulation in cancer                                 | 6,20E-04* | 21              |
|                                                | Amoebiasis                                                              | 8,80E-04* | 14              |
|                                                | Hypertrophic cardiomyopathy                                             | 9,20E-04* | 13              |
|                                                | EGFR tyrosine kinase inhibitor resistance                               | 1,00E-03* | 12              |
|                                                | TGF-beta signaling pathway (KEGG)                                       | 1,40E-03* | 13              |
|                                                | Glycosaminoglycan biosynthesis - chondroitin sulfate / dermatan sulfate | 1,90E-03* | 6               |
|                                                | Fluid shear stress and atherosclerosis                                  | 2,00E-03* | 16              |
|                                                | TNF signaling pathway                                                   | 2,10E-03* | 14              |
|                                                | Tight junction                                                          | 2,30E-03* | 18              |
|                                                | Pancreatic cancer                                                       | 2,70E-03* | 11              |
|                                                | Relaxin signaling pathway                                               | 2,70E-03* | 15              |

|                                                          |           |    |
|----------------------------------------------------------|-----------|----|
| Dilated cardiomyopathy                                   | 5,00E-03  | 12 |
| MicroRNAs in cancer                                      | 5,30E-03  | 26 |
| Melanoma                                                 | 6,10E-03  | 10 |
| TGF beta signaling pathway (Biocarta)                    | 6,80E-03  | 6  |
| Gastric cancer                                           | 9,70E-03  | 15 |
| Lipid and atherosclerosis                                | 1,20E-02  | 19 |
| Platelet Amyloid Precursor Protein Pathway               | 1,50E-02  | 5  |
| Hematopoietic cell lineage                               | 1,70E-02  | 11 |
| Calcium signaling pathway                                | 1,70E-02  | 20 |
| VEGF signaling pathway                                   | 1,90E-02  | 8  |
| p53 signaling pathway                                    | 2,00E-02  | 9  |
| Chronic myeloid leukemia                                 | 2,50E-02  | 9  |
| Glycosaminoglycan biosynthesis - keratan sulfate         | 2,50E-02  | 4  |
| Bacterial invasion of epithelial cells                   | 2,70E-02  | 9  |
| Estrogen signaling pathway                               | 2,80E-02  | 13 |
| 114.Genomic_reformatting_Brain_Ischemia                  | 2,80E-02  | 4  |
| Integrin Signaling Pathway                               | 3,40E-02  | 7  |
| Role of Tob in T-cell activation                         | 3,40E-02  | 5  |
| Signaling pathways regulating pluripotency of stem cells | 3,50E-02  | 13 |
| Toxoplasmosis                                            | 3,60E-02  | 11 |
| Inflammatory mediator regulation of TRP channels         | 3,90E-02  | 10 |
| Chemical carcinogenesis - receptor activation            | 3,90E-02  | 17 |
| Bladder cancer                                           | 4,10E-02  | 6  |
| Complement and coagulation cascades                      | 4,40E-02  | 9  |
| Colorectal cancer                                        | 4,70E-02  | 9  |
| Focal adhesion                                           | 7,30E-06* | 17 |
| AGE-RAGE signaling pathway in diabetic complications     | 1,00E-05* | 12 |

|                                                 |           |    |
|-------------------------------------------------|-----------|----|
| Pathways in cancer                              | 5,00E-04* | 25 |
| ECM-receptor interaction                        | 6,40E-04* | 9  |
| TNF signaling pathway                           | 7,30E-04* | 10 |
| Platelet Amyloid Precursor Protein Pathway      | 1,70E-03  | 5  |
| Regulation of actin cytoskeleton                | 2,90E-03  | 13 |
| Proteoglycans in cancer                         | 5,20E-03  | 12 |
| Amoebiasis                                      | 6,80E-03  | 8  |
| Relaxin signaling pathway                       | 7,10E-03  | 9  |
| Leukocyte transendothelial migration            | 1,20E-02  | 8  |
| Human papillomavirus infection                  | 1,30E-02  | 15 |
| Hypertrophic cardiomyopathy                     | 1,40E-02  | 7  |
| Small cell lung cancer                          | 1,50E-02  | 7  |
| Rheumatoid arthritis                            | 1,60E-02  | 7  |
| Dilated cardiomyopathy                          | 1,80E-02  | 7  |
| Chagas disease                                  | 2,40E-02  | 7  |
| Pancreatic cancer                               | 2,50E-02  | 6  |
| Arrhythmogenic right ventricular cardiomyopathy | 2,60E-02  | 6  |
| Cytokine-cytokine receptor interaction          | 2,80E-02  | 13 |
| TGF beta signaling pathway                      | 3,10E-02  | 4  |
| Role of Tob in T-cell activation                | 3,10E-02  | 4  |
| Tight junction                                  | 3,10E-02  | 9  |
| MicroRNAs in cancer                             | 3,80E-02  | 13 |
| Arachidonic acid metabolism                     | 4,40E-02  | 5  |
| Axon guidance                                   | 4,60E-02  | 9  |
| PI3K-Akt signaling pathway                      | 4,60E-02  | 14 |
| Regulators of Bone Mineralization               | 5,00E-02  | 3  |

C: KOAGR2  $\cap$  scr TGF $\beta$ ; 0.67 > FC > 1.5; p < 0.05

|                    |           |    |
|--------------------|-----------|----|
| Pathways in cancer | 1,70E-04* | 15 |
|--------------------|-----------|----|

|                                                          |                                                      |           |    |
|----------------------------------------------------------|------------------------------------------------------|-----------|----|
|                                                          | Proteoglycans in cancer                              | 3,90E-04* | 9  |
|                                                          | Relaxin signaling pathway                            | 8,90E-04  | 7  |
|                                                          | AGE-RAGE signaling pathway in diabetic complications | 1,80E-03  | 6  |
|                                                          | Focal adhesion                                       | 1,80E-03  | 8  |
|                                                          | Arachidonic acid metabolism                          | 1,90E-03  | 5  |
|                                                          | Human papillomavirus infection                       | 8,00E-03  | 9  |
|                                                          | MAPK signaling pathway                               | 1,40E-02  | 8  |
|                                                          | MicroRNAs in cancer                                  | 1,80E-02  | 8  |
|                                                          | Platelet Amyloid Precursor Protein Pathway           | 2,40E-02  | 3  |
|                                                          | Kaposi sarcoma-associated herpesvirus infection      | 2,70E-02  | 6  |
|                                                          | Pancreatic cancer                                    | 2,90E-02  | 4  |
|                                                          | PI3K-Akt signaling pathway                           | 3,40E-02  | 8  |
|                                                          | Chemical carcinogenesis - receptor activation        | 3,80E-02  | 6  |
|                                                          | Hypertrophic cardiomyopathy                          | 4,40E-02  | 4  |
|                                                          | Small cell lung cancer                               | 4,60E-02  | 4  |
|                                                          | GnRH signaling pathway                               | 4,80E-02  | 4  |
|                                                          | Rheumatoid arthritis                                 | 4,80E-02  | 4  |
|                                                          | Bladder cancer                                       | 5,00E-02  | 3  |
| D: KOAGR2 TGF- $\beta$ vs scr; 0.67 > FC > 1.5; p < 0.05 | Focal adhesion                                       | 4,40E-10* | 41 |
|                                                          | Axon guidance                                        | 1,60E-07* | 34 |
|                                                          | ECM-receptor interaction                             | 2,80E-07* | 22 |
|                                                          | Pathways in cancer                                   | 8,00E-07* | 67 |
|                                                          | Proteoglycans in cancer                              | 2,70E-06* | 34 |
|                                                          | AGE-RAGE signaling pathway in diabetic complications | 2,70E-06* | 22 |
|                                                          | MAPK signaling pathway                               | 2,90E-06* | 43 |
|                                                          | PI3K-Akt signaling pathway                           | 5,90E-06* | 48 |
|                                                          | Hippo signaling pathway                              | 6,20E-06* | 28 |

|                                                                         |           |    |
|-------------------------------------------------------------------------|-----------|----|
| Human papillomavirus infection                                          | 1,10E-05* | 45 |
| Regulation of actin cytoskeleton                                        | 2,70E-05* | 33 |
| Small cell lung cancer                                                  | 3,80E-05* | 19 |
| Hypertrophic cardiomyopathy                                             | 9,90E-05* | 18 |
| Arrhythmogenic right ventricular cardiomyopathy                         | 1,80E-04* | 16 |
| Rap1 signaling pathway                                                  | 1,90E-04* | 30 |
| TNF signaling pathway                                                   | 5,10E-04* | 19 |
| Amoebiasis                                                              | 1,30E-03* | 17 |
| 114.Genomic_reformatting_Brain_Ischemia                                 | 1,60E-03* | 6  |
| Dilated cardiomyopathy                                                  | 2,00E-03* | 16 |
| Tight junction                                                          | 2,40E-03* | 23 |
| EGFR tyrosine kinase inhibitor resistance                               | 2,40E-03* | 14 |
| Fluid shear stress and atherosclerosis                                  | 2,70E-03* | 20 |
| Other types of O-glycan biosynthesis                                    | 3,90E-03  | 10 |
| TGF-beta signaling pathway (KEGG)                                       | 4,30E-03  | 15 |
| Complement and coagulation cascades                                     | 4,60E-03  | 14 |
| Transcriptional misregulation in cancer                                 | 5,50E-03  | 24 |
| Calcium signaling pathway                                               | 6,60E-03  | 28 |
| Hematopoietic cell lineage                                              | 6,80E-03  | 15 |
| Melanoma                                                                | 8,90E-03  | 12 |
| Glycosaminoglycan biosynthesis - chondroitin sulfate / dermatan sulfate | 9,40E-03  | 6  |
| p53 signaling pathway                                                   | 9,90E-03  | 12 |
| Lipid and atherosclerosis                                               | 1,10E-02  | 25 |
| Gastric cancer                                                          | 1,20E-02  | 19 |
| Relaxin signaling pathway                                               | 1,40E-02  | 17 |
| Glyoxylate and dicarboxylate metabolism                                 | 1,40E-02  | 7  |
| Chemical carcinogenesis - receptor activation                           | 1,70E-02  | 24 |
| Toxoplasmosis                                                           | 1,90E-02  | 15 |

|                                                            |           |     |
|------------------------------------------------------------|-----------|-----|
| Ferroptosis                                                | 1,90E-02  | 8   |
| Glycosaminoglycan biosynthesis - heparan sulfate / heparin | 2,10E-02  | 6   |
| Arginine and proline metabolism                            | 2,10E-02  | 9   |
| Platelet activation                                        | 2,10E-02  | 16  |
| Rheumatoid arthritis                                       | 2,30E-02  | 13  |
| TGF beta signaling pathway (Biocarta)                      | 2,40E-02  | 6   |
| Cell adhesion molecules                                    | 2,40E-02  | 18  |
| Basal cell carcinoma                                       | 2,60E-02  | 10  |
| Pancreatic cancer                                          | 3,20E-02  | 11  |
| Signaling pathways regulating pluripotency of stem cells   | 3,30E-02  | 17  |
| Inflammatory mediator regulation of TRP channels           | 3,30E-02  | 13  |
| Cellular senescence                                        | 3,60E-02  | 18  |
| Hepatocellular carcinoma                                   | 3,60E-02  | 19  |
| Legionellosis                                              | 3,80E-02  | 9   |
| Platelet Amyloid Precursor Protein Pathway                 | 4,10E-02  | 5   |
| Breast cancer                                              | 4,10E-02  | 17  |
| Glutathione metabolism                                     | 4,10E-02  | 9   |
| Ras signaling pathway                                      | 4,30E-02  | 24  |
| Yersinia infection                                         | 4,50E-02  | 16  |
| Integrin Signaling Pathway                                 | 4,50E-02  | 8   |
| Metabolic pathways                                         | 4,60E-02  | 121 |
| Protein digestion and absorption                           | 4,60E-02  | 13  |
| Antifolate resistance                                      | 5,00E-02  | 6   |
| Pathways in cancer                                         | 1,70E-04* | 15  |
| Proteoglycans in cancer                                    | 3,90E-04* | 9   |
| Relaxin signaling pathway                                  | 8,90E-04  | 7   |
| AGE-RAGE signaling pathway in diabetic complications       | 1,80E-03  | 6   |

E: KOAGR2  $\cap$  scr TGF $\beta$   $\cap$  KOAGR2 TGF  $\beta$ ; 0.67 > FC > 1.5; p < 0.05

|                                                 |          |   |
|-------------------------------------------------|----------|---|
| Focal adhesion                                  | 1,80E-03 | 8 |
| Arachidonic acid metabolism                     | 1,90E-03 | 5 |
| Human papillomavirus infection                  | 8,00E-03 | 9 |
| MAPK signaling pathway                          | 1,40E-02 | 8 |
| MicroRNAs in cancer                             | 1,80E-02 | 8 |
| Platelet Amyloid Precursor Protein Pathway      | 2,40E-02 | 3 |
| Kaposi sarcoma-associated herpesvirus infection | 2,70E-02 | 6 |
| Pancreatic cancer                               | 2,90E-02 | 4 |
| PI3K-Akt signaling pathway                      | 3,40E-02 | 8 |
| Chemical carcinogenesis - receptor activation   | 3,80E-02 | 6 |
| Hypertrophic cardiomyopathy                     | 4,40E-02 | 4 |
| Small cell lung cancer                          | 4,60E-02 | 4 |
| GnRH signaling pathway                          | 4,80E-02 | 4 |
| Rheumatoid arthritis                            | 4,80E-02 | 4 |
| Bladder cancer                                  | 5,00E-02 | 3 |

---

\*  $p_{HB} < 0.05$
