# Supplementary material for: Identification of AGR2 Gene-Specific Expression Patterns Associated with Epithelial-Mesenchymal Transition
Source: Int J Mol Sci. 2022 Sep 16;23(18):10845. doi: 10.3390/ijms231810845 (PMC9504245; doi:10.3390/ijms231810845)
Supplement: Supplementary file 1 [file ijms-23-10845-s001.zip]

Archive with 4 entries (4 files):
- SI FIGURES together_220830.pdf
- Table S1.pdf
- Table S2 - analysis summary.pdf
- Table S3 primer sequences.pdf
